# Supplementary material for: The Anti-Inflammatory Effect of Bovine Bone-Gelatin-Derived Peptides in LPS-Induced RAW264.7 Macrophages Cells and Dextran Sulfate Sodium-Induced C57BL/6 Mice
Source: MDPI journal article supplement (doi:10.3390/nu14071479), 2022-04-01
Supplement: s1 [file s1]

The anti-inflammatory effect of bovine bone collagen derived peptides in  
LPS-induced RAW264.7 cells and dextran sulfate sodium-induced  
C57BL/6 mice

Lujuan Xing<sup>a</sup>, Lijuan Fu<sup>a</sup>, Songmin Cao<sup>b</sup>, Yantao Yin<sup>a</sup>, Lanlan Wei<sup>c</sup>, Wangang Zhang<sup>a\*</sup>

<sup>a</sup> *Key Laboratory of Meat Processing and Quality Control, MOE; Jiangsu Synergetic Innovation  
Center of Meat Processing and Quality Control; Nanjing Agricultural University; Nanjing, 210095,*

*P.R. China; Contact information: [wangang.zhang@njau.edu.cn](mailto:wangang.zhang@njau.edu.cn)*

<sup>b</sup> *School of Food and Wine; Ningxia University; Yinchuan, 750021, P.R. China*

<sup>c</sup> *College of Food Engineering, Anhui Science and Technology University; Fengyang, 233100, P.R.*

*China*

**Table S1 The composition of peptides in GP**

Shown in the EXCLE

**Table S2 Primer sequences used in RT-PCR assay**

| Gene          | Forward primer (5'-3')    | Reverse primer (5'-3')   |
|---------------|---------------------------|--------------------------|
| GAPDH         | ATCACTGCCACCCAGAAG        | TCCACGACGGACACATTG       |
| TNF- $\alpha$ | CATCTTCTCAAAATTCGAGTGACAA | TGGGAGTAGACAAGGTACAACCC  |
| IL-1 $\beta$  | TCAAATCTCGCAGCAGCACATC-3' | CCAGCAGGTTATCATCATCATCCC |
| COX-2         | CCCATTAGCAGCCAGTTGTC      | CAGGATGCAGTGCTGAGTTC     |
| MCP-1         | AACTGCATCTGCCCTAAGGT      | CTGTCACACTGGTCACTCCT     |
| TLR-4         | GCTCTCAGCCATCCACAAAG      | GAGTCGGGAAGAGGAAGAGG     |
| ZO-1          | TGAGTGCGTTTCTCTCCCTT      | CCCTCTGTGTTCTCATGGT      |
| Occludin      | AGCACTTAACCTGCCTGGAT      | AGCCTGTGGAAGCAAGAGAT     |

**Table S3.** The scoring criteria for histopathological values

| Score | Inflammation                                                                                                          | Crypt damage                                                                  | Ulceration                             | Edema   |
|-------|-----------------------------------------------------------------------------------------------------------------------|-------------------------------------------------------------------------------|----------------------------------------|---------|
| 0     | No infiltrate                                                                                                         | None                                                                          | None                                   | None    |
| 1     | Occasional cell limited to submucosa                                                                                  | Some crypt damage, spaces between crypts                                      | Small, focal ulcers                    | Absent  |
| 2     | Significant presence of inflammatory cells in submucosa, limited to focal areas                                       | Larger spaces between crypts, loss of goblet cells, some shortening of crypts | Frequent small ulcers                  | Present |
| 3     | Infiltrate present in both submucosa and lamina propria, limited to focal areas                                       | Large areas without crypts, surrounded by normal crypts                       | Large areas lacking surface epithelium |         |
| 4     | Large amount of infiltrate in submucosa, lamina propria and surrounding blood vessels, covering large areas of mucosa | No crypts                                                                     |                                        |         |
| 5     | Transmural inflammation (mucosa to muscularis)                                                                        |                                                                               |                                        |         |

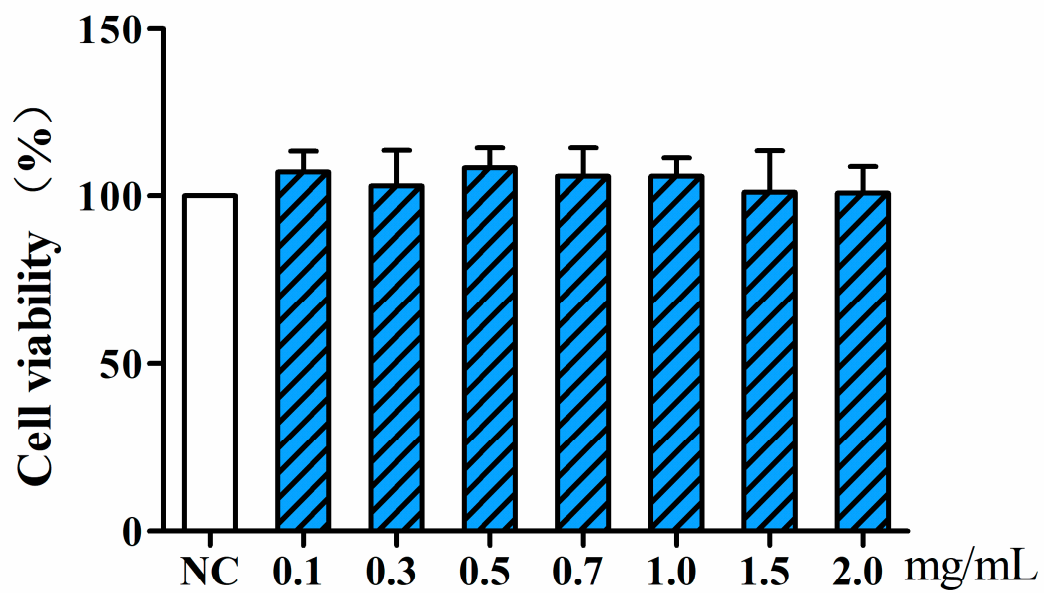

**Figure S1.** Effects of the GP in RAW264.7 cell viability.

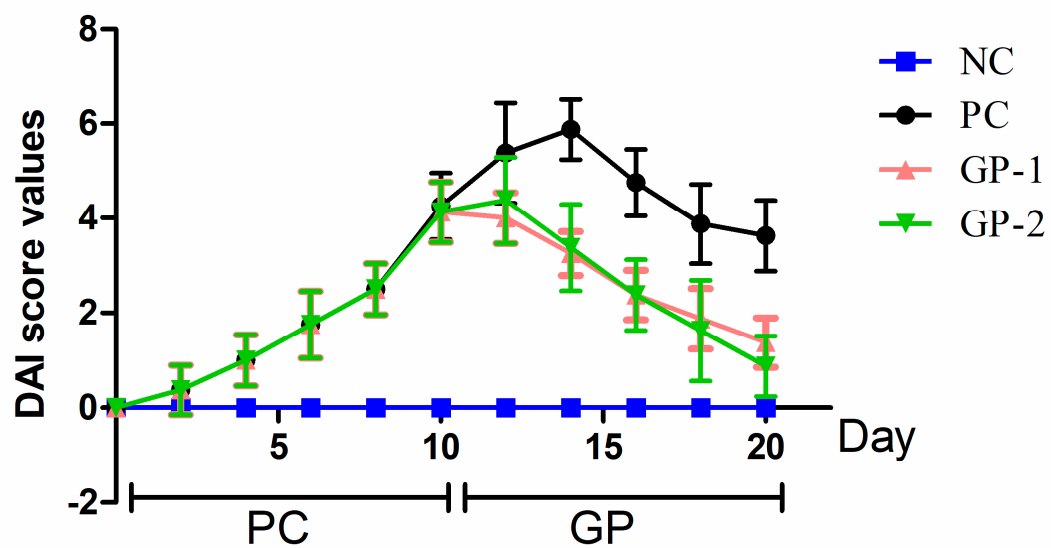

**Figure S2.** The DAI scores of mice in different groups.

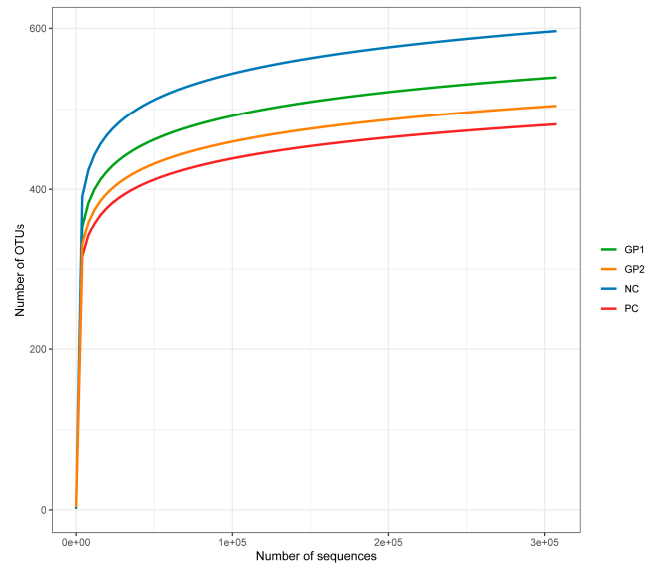

(A)

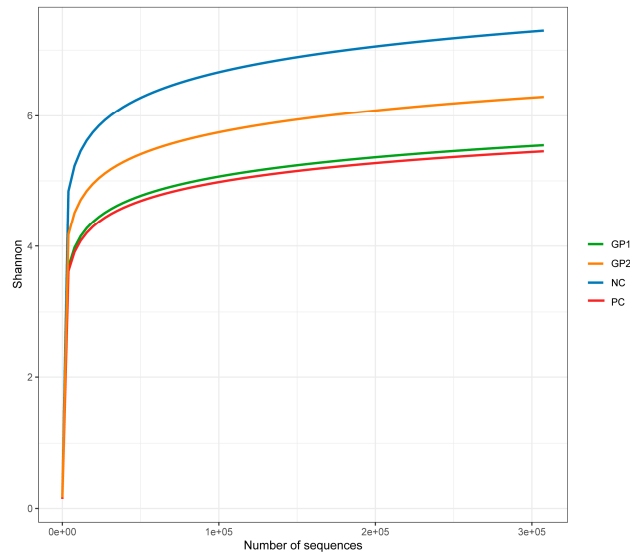

(B)

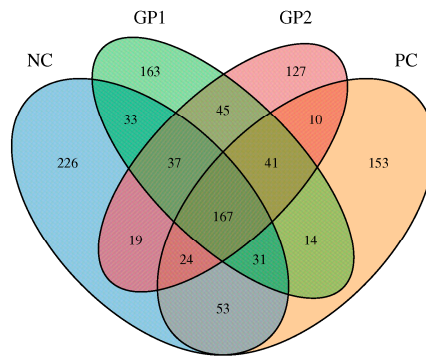

(C)

**Figure S3.** The OTU numbers (A), Shannon Rarefaction curves (B) and Venn diagram of OTU(C)

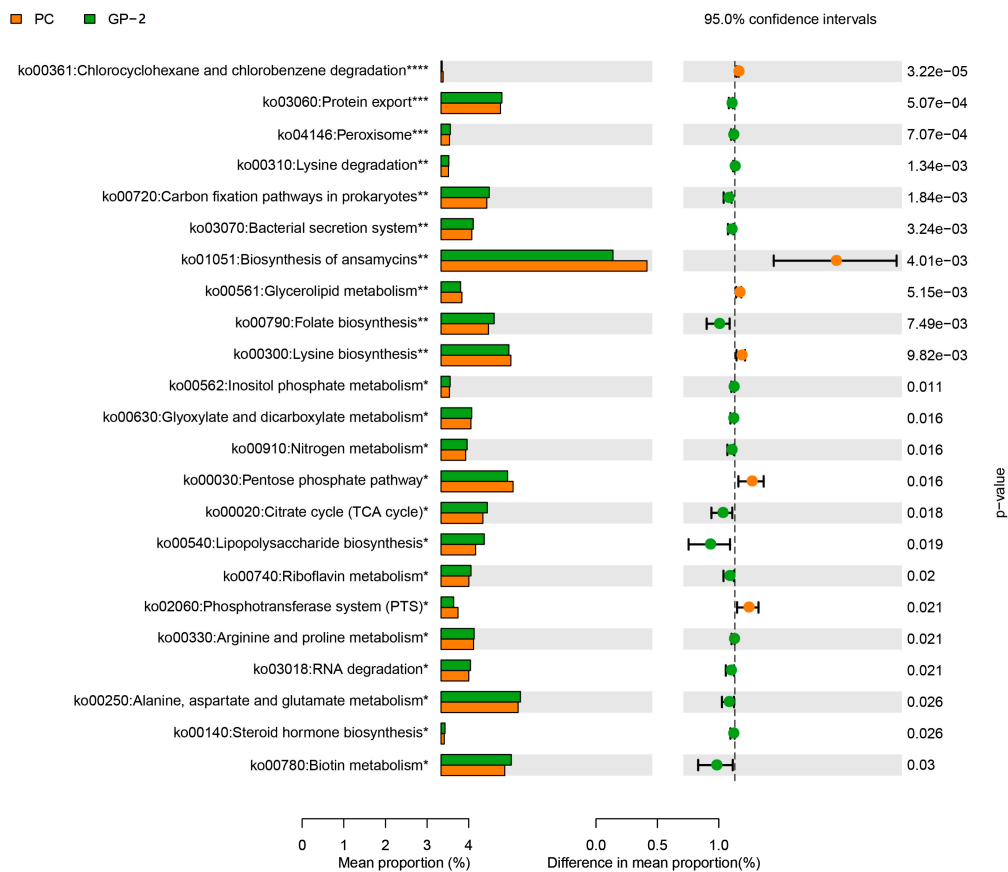

**Figure. S4.** Predicted and functions annotation was performed by PICRUSt. The supplement of GP-2 (300 mg/kg/day) on predicted functions in DSS-treated mice.
