# Supplementary material for: The Anti-Inflammatory Effect of Bovine Bone-Gelatin-Derived Peptides in LPS-Induced RAW264.7 Macrophages Cells and Dextran Sulfate Sodium-Induced C57BL/6 Mice
Source: Nutrients. 2022 Apr 1;14(7):1479. doi: 10.3390/nu14071479 (PMC9003490; doi:10.3390/nu14071479)
Supplement: Supplementary file 1 [file nutrients-14-01479-s001.zip › Table S1 The peptides composition of GP .csv]

Table S1 The peptides composition of GP
Peptide	-10lgP	Mass	Length	ppm	m/z	RT	Accession	PTM	AScore
NNIPGER	18.42	798.3984	7	10.3	400.2078	23.24
GSPGISGPK	21.22	798.4235	9	1.5	400.2169	9.28	Q08E14|Q08E14_BOVIN
LGGTAPGAR	17.92	798.4348	9	9.6	400.2258	17.13
GKGEQGPAG	19.98	799.3824	9	-0.1	400.6957	1.38	sp|P02465|CO1A2_BOVIN
GPPGYRGP	19.93	799.3976	8	-0.8	400.703	15.02
LGPDGVSR	23.31	799.4188	8	0.9	400.7143	20.84
GLGNGGLGR	15.11	799.4301	9	-14.7	400.7137	24.68
GRGPPLGF	16.96	799.434	8	0.5	400.7217	27.4
SLCPSGHT	18.68	800.3487	8	-2.5	401.1779	13.33
GEKGAPGAD	27.44	800.3664	9	-0.8	401.1874	4.41	sp|P02453|CO1A1_BOVIN
GEKGSPGIG	15.67	800.4028	9	0.4	401.2061	9.18	A0A3Q1M1R0|A0A3Q1M1R0_BOVIN:A0A3Q1M906|A0A3Q1M906_BOVIN:F1MJY9|F1MJY9_BOVIN:A0A3Q1NK51|A0A3Q1NK51_BOVIN
GEKGSPGLG	15.67	800.4028	9	0.4	401.2061	9.18	F1N7K7|F1N7K7_BOVIN
VAPGAFAGL	20.06	801.4385	9	-3.2	401.7225	78.85
RGVLPGGF	22.1	801.4497	8	-13.8	401.7238	77
GWTLGRL	16.23	801.4497	7	14.4	401.7352	19.09
GEEGKRGA	23.38	802.3933	8	-4.8	402.1992	6.69	sp|P02453|CO1A1_BOVIN
FGFDGDF	23.26	803.3126	7	3.3	402.6621	77.36	sp|P02465|CO1A2_BOVIN
KSPGPDGF	17.29	803.3813	8	14	402.7008	18.02
GPRGPPGPA	19.86	804.4242	9	0.4	403.2168	8.95
GFGMIGPK	16.44	805.4156	8	-3.7	403.7108	31.87
PLGPKHGT	16.79	805.4446	8	-3.8	403.7253	14.07	F1MKR5|F1MKR5_BOVIN
KSSGWSR	15.64	806.4035	7	14.4	404.2121	1.8
PAGIPPQE	16.22	807.4126	8	0.5	404.711	56.15
LPQPPQE	19.76	807.4127	7	-1.8	404.7101	24.78	sp|P02453|CO1A1_BOVIN
GPSVIAAPP	23.98	807.449	9	0.5	404.7292	52.74
GPPGPAGEK	15.59	808.4078	9	0.5	405.2086	7.11	sp|P02453|CO1A1_BOVIN:G3MZI7|G3MZI7_BOVIN:F1N0K0|F1N0K0_BOVIN:sp|Q28083|COBA1_BOVIN
GPAGPPGEK	17.98	808.4078	9	13.6	405.2139	7.79
GPSGLPGAPG	25.49	808.4079	10	1.3	405.209	56.99	A0A3Q1M1R0|A0A3Q1M1R0_BOVIN:A0A3Q1M906|A0A3Q1M906_BOVIN:F1MJY9|F1MJY9_BOVIN:A0A3Q1NK51|A0A3Q1NK51_BOVIN
GPSGPQGPL	24.43	808.4079	9	4.5	405.2103	15.28	sp|Q32S24|COBA2_BOVIN
PGSPARGAP	15.8	808.4191	9	-8.1	405.2108	10.71
GPSAGRPPA	16.94	808.4191	9	-3	405.2129	9.45
GPIGQPGIA	16.58	808.4443	9	-0.1	405.2266	50.91	F1N0K0|F1N0K0_BOVIN:sp|Q28083|COBA1_BOVIN
GPPGPGTPM	16.7	809.3741	9	2.3	405.6925	65.88
IQAPPGPM	17.61	809.4105	8	0.5	405.71	52.84	A0A3Q1M1R0|A0A3Q1M1R0_BOVIN:A0A3Q1M906|A0A3Q1M906_BOVIN:F1MJY9|F1MJY9_BOVIN:A0A3Q1NK51|A0A3Q1NK51_BOVIN
GPMGPAGPAG	16.12	810.3694	10	-4.6	406.1873	20.18
GPSGPPGKD	20.96	810.3871	9	2.7	406.1992	67.64	Q08E14|Q08E14_BOVIN
GPSGDPGKP	15.67	810.3871	9	9.8	406.202	24.36	W0SK50|W0SK50_BOVIN
GPAGLPGKD	23.57	810.4235	9	13.4	406.2217	13.46	G3MZI7|G3MZI7_BOVIN
GLAGPGRPS	18.79	810.4348	9	0.3	406.222	10.06
GPAATARPA	16.39	810.4348	9	2	406.2227	9.81
LGPGLGQGL	17.27	810.4599	9	1.3	406.235	23.01
ASLPSPKI	22.97	811.4803	8	2	406.7455	28.17	A0A3Q1MHT0|A0A3Q1MHT0_BOVIN:F1MCK2|F1MCK2_BOVIN:A0A3Q1NE82|A0A3Q1NE82_BOVIN
PGAGAGESPA	15.87	812.3664	10	10.6	407.192	3.58
FSMPGFK	29.99	812.389	7	1.3	407.1995	43.76	A0A3Q1MHT0|A0A3Q1MHT0_BOVIN:F1MCK2|F1MCK2_BOVIN:A0A3Q1NE82|A0A3Q1NE82_BOVIN
GPSGVATAPG	22.19	812.4028	10	13.9	407.2115	7.54
GLPGADGRA	17.94	812.414	9	0.6	407.2117	15.46	sp|P02465|CO1A2_BOVIN
LDDLPGAL	20.67	812.428	8	2.8	407.2196	67.09	sp|P01966|HBA_BOVIN:A0A1K0FUD3|A0A1K0FUD3_BOVIN:A0A452DIQ5|A0A452DIQ5_BOVIN
GPTGVTGPK	24.96	812.4392	9	0.1	407.2241	10.42
DARVKGPA	15.44	812.4504	8	10	407.2338	3.11
GQAGEKGPA	16.57	813.3981	9	-9.8	407.6995	5.84	E1BKJ9|E1BKJ9_BOVIN
GERGIPGE	20.31	813.3981	8	2.2	407.7044	12.78	sp|P02465|CO1A2_BOVIN
GERGLPGE	20.31	813.3981	8	2.2	407.7044	12.78
MDKPPGGL	17.35	813.4055	8	-8.1	407.7039	53.25
LNLGNNGL	21.55	813.4344	8	0.7	407.722	18.96
LGPGGFPGI	17.3	813.4385	9	0.1	407.7238	81.44	sp|P04985|ELN_BOVIN
GPSGKEGSP	18.58	814.3821	9	-4	408.1939	0.15	F1N2Y2|F1N2Y2_BOVIN:A0A3Q1LSX2|A0A3Q1LSX2_BOVIN:A0A3Q1LL95|A0A3Q1LL95_BOVIN:A0A3Q1MDT9|A0A3Q1MDT9_BOVIN:A0A3Q1MUF0|A0A3Q1MUF0_BOVIN
GGGGLGGGLGN	15.1	814.3933	11	12.2	408.2061	20.29
AENKGISP	15.87	814.4185	8	14.5	408.2196	2.36
QAGVLSGLA	20.67	814.4548	9	2.7	408.233	19.72
REGGGGAGR	18.38	815.3998	9	5.3	408.7065	7.5
GIPGRDGF	18.15	817.4082	8	-0.8	409.7083	25.61
GPDGGFLR	19.14	817.4082	8	1.6	409.7092	27.17
RGFPGER	29.3	817.4194	7	0.6	409.7144	8.99	sp|P02453|CO1A1_BOVIN:sp|Q32S24|COBA2_BOVIN:F1N0K0|F1N0K0_BOVIN:sp|Q28083|COBA1_BOVIN
GPLAAYNL	21.5	817.4333	8	-1.5	409.7206	66.97
FDGAPGQK	17.81	818.3922	8	0	410.2006	34.06	sp|Q7SIB2|CO4A1_BOVIN
DLSFLPQ	17.89	818.4174	7	-0.1	410.2131	74.49	sp|P02453|CO1A1_BOVIN
APGRGPPPA	26.19	818.4398	9	0.2	410.2245	11.08
GFDGDFY	19.64	819.3075	7	1.1	410.6587	55.8	sp|P02465|CO1A2_BOVIN
GPPGEPGLP	19.13	819.4126	9	1.5	410.7114	32.38	A0A3Q1M1R0|A0A3Q1M1R0_BOVIN:A0A3Q1M906|A0A3Q1M906_BOVIN:F1MJY9|F1MJY9_BOVIN:A0A3Q1NK51|A0A3Q1NK51_BOVIN
GPLGPPGLI	15.06	819.4854	9	2.9	410.7484	77.31	A0A3Q1M1R0|A0A3Q1M1R0_BOVIN:A0A3Q1M906|A0A3Q1M906_BOVIN:F1MJY9|F1MJY9_BOVIN:A0A3Q1NK51|A0A3Q1NK51_BOVIN
RGFDGRN	32.14	820.394	7	-1.9	411.2007	5.5	Q08E14|Q08E14_BOVIN
GPGATPPGAP	22.14	820.4079	10	13.3	411.2139	8.54
GPPGRPGSP	20.68	820.4191	9	2.4	411.215	10.26
VGGPGIPGAP	20.84	820.4443	10	3.8	411.2282	37.18	sp|P04985|ELN_BOVIN
PGALAPAGAP	20.99	820.4443	10	12.3	411.2317	25.4
GLPGPRGPA	27.7	820.4555	9	-2.3	411.2313	18.02
GRPGPIGPA	32.86	820.4555	9	1.2	411.2327	12.91	sp|P02465|CO1A2_BOVIN
NSIPQYT	16.2	821.3919	7	-7.8	411.6972	16.78
GFGFPQGI	15.92	821.4072	8	0.5	411.7083	27.24
LPGEPGPR	21.27	821.4395	8	-1.6	411.7236	21.47	G3MZI7|G3MZI7_BOVIN
FSYPGPR	25.7	822.4024	7	0.3	412.2058	21.42	Q1JQB0|Q1JQB0_BOVIN
PGSGIPGAPA	18.78	822.4235	10	0.8	412.2166	47.88
PQPPQEK	24.6	822.4235	7	1.6	412.2169	26.53	sp|P02453|CO1A1_BOVIN
PGAIGPSGPA	18.43	822.4235	10	13	412.2216	6.28	Q08E14|Q08E14_BOVIN
FTMPSLK	22.15	822.431	7	0.8	412.2203	38.97	A0A3Q1MHT0|A0A3Q1MHT0_BOVIN:F1MCK2|F1MCK2_BOVIN:A0A3Q1NE82|A0A3Q1NE82_BOVIN
GRVGPPGPS	29.41	822.4348	9	-0.2	412.2217	10.88	sp|P02453|CO1A1_BOVIN
GPRGPVGPS	27.51	822.4348	9	0.7	412.2221	10.18	Q08E14|Q08E14_BOVIN
GLPGGPGLR	31.78	822.4711	9	-0.5	412.2398	22.24	Q08E14|Q08E14_BOVIN
GPIGPVGAR	24.85	822.4711	9	0.5	412.2402	16.6	sp|P02453|CO1A1_BOVIN
SGGMGYPR	24.16	823.3646	8	1.6	412.6874	15.08
AAGPSGPNGP	16.2	823.3824	10	12.5	412.7008	1.96	sp|P02465|CO1A2_BOVIN
IDGRPGPI	29.42	823.4551	8	1.3	412.7326	23.1	sp|P02465|CO1A2_BOVIN
GPSGISGPPG	23.07	824.4028	10	1.9	413.2066	5.31	sp|P02465|CO1A2_BOVIN
GSPGIGIGAP	18.15	824.4392	10	0.4	413.2242	11.18	A0A3Q1M1R0|A0A3Q1M1R0_BOVIN:A0A3Q1M906|A0A3Q1M906_BOVIN:F1MJY9|F1MJY9_BOVIN:A0A3Q1NK51|A0A3Q1NK51_BOVIN
GLPGIPGSK	16.03	824.4756	9	-1	413.2418	25.9	F1N474|F1N474_BOVIN:A0A3Q1M0M2|A0A3Q1M0M2_BOVIN:A0A3Q1M970|A0A3Q1M970_BOVIN
GPIGSIGPK	19.92	824.4756	9	11.3	413.2469	20.2	E1BB91|E1BB91_BOVIN
VVGLPGQR	29.43	824.4868	8	-0.2	413.2478	19.83	sp|P02453|CO1A1_BOVIN
NKEGPGGPA	15.58	825.3981	9	9.8	413.7075	0.88
GSPGNIGPAG	17.52	825.3981	10	9.8	413.7075	45.62	sp|P02465|CO1A2_BOVIN
FLPQPPQ	26.21	825.4385	7	1.6	413.7243	39.9	sp|P02453|CO1A1_BOVIN
MGPRIGPV	27.96	825.4531	8	-1.5	413.7303	27.74
PGSGLSVGPG	21.14	826.4185	10	-6.5	414.211	15.5
FLPAGPPE	19.51	826.4225	8	1.4	414.2163	43.52
GAPGFPGPK	21.54	826.4337	9	-2.1	414.2204	18.54	F1N474|F1N474_BOVIN:A0A3Q1M0M2|A0A3Q1M0M2_BOVIN:A0A3Q1M970|A0A3Q1M970_BOVIN:A0A3Q1M1R0|A0A3Q1M1R0_BOVIN:A0A3Q1M906|A0A3Q1M906_BOVIN:F1MJY9|F1MJY9_BOVIN:A0A3Q1NK51|A0A3Q1NK51_BOVIN
GLRGPRGD	23.07	826.4409	8	0.2	414.225	7.3	sp|P02465|CO1A2_BOVIN
KGDIGPAGL	15.63	826.4548	9	-1.9	414.2311	4.62
GIMGEKGH	20.85	827.3959	8	0	414.7024	8.02	F1MTP1|F1MTP1_BOVIN
GFPGLPGPS	32.46	827.4177	9	-0.4	414.7131	63.82	sp|P02453|CO1A1_BOVIN
KGDVKGPQ	15.81	827.4501	8	-0.3	414.7294	1.3	A0A3Q1MHT0|A0A3Q1MHT0_BOVIN:F1MCK2|F1MCK2_BOVIN:A0A3Q1NE82|A0A3Q1NE82_BOVIN
GSPGRDGSP	23.49	828.3726	9	-1.3	415.1902	1.71	sp|P02453|CO1A1_BOVIN
KGDMGPPGA	17.04	828.3799	9	-14	415.1886	1.47	F1N7K7|F1N7K7_BOVIN
GPTGEKGSP	16.11	828.3977	9	-3.4	415.2019	0.63
GISPGDQR	15.95	828.4089	8	0.9	415.2093	11.47
PGMKGPSGV	15.66	828.4164	9	3	415.2139	74.95	F1N474|F1N474_BOVIN:A0A3Q1M0M2|A0A3Q1M0M2_BOVIN:A0A3Q1M970|A0A3Q1M970_BOVIN
GAPGFPGAR	26.79	828.4242	9	0.3	415.2167	17.72	sp|P02453|CO1A1_BOVIN
GIDKDGKP	15.22	828.4341	8	-0.6	415.2213	16.28
VGEKSGPR	17.7	828.4453	8	14.4	415.2331	0.57
NIGFPGPK	30.61	828.4493	8	0.8	415.2294	27.21	sp|P02465|CO1A2_BOVIN
GVGVASGIGL	17.74	828.4705	10	-0.4	415.2395	25.29
QASQGSPGV	20.34	829.3929	9	-2.2	415.7	30.58
GHRGFSGL	34.47	829.4194	8	-1	415.7137	11.08	sp|P02453|CO1A1_BOVIN
FGLPGDPK	15.03	829.4333	8	14.6	415.7272	23.12
PVNFKLL	25.56	829.5062	7	2.9	415.7587	49.79	sp|P01966|HBA_BOVIN:A0A1K0FUD3|A0A1K0FUD3_BOVIN
ADASAPGSR	18.53	830.3882	9	-0.1	416.1985	2.95
GEGVGLDGK	21.18	830.4133	9	-1.9	416.2103	1.38	F1MZU6|F1MZU6_BOVIN
EGRLFPI	17.04	830.465	7	1	416.2373	52.73
WETGPSR	16.61	831.3875	7	-11.9	416.6932	13.94
PPNFGPGF	16.7	831.3915	8	0.8	416.7005	66.8
GERGFPGL	27.09	831.4238	8	0.6	416.7166	33.28	sp|P02453|CO1A1_BOVIN:W0SK50|W0SK50_BOVIN
VMGFPGPK	20.3	831.4313	8	-8.7	416.7164	19.06	sp|P02453|CO1A1_BOVIN:Q08E14|Q08E14_BOVIN
SGPPGPPGPA	31.07	832.4078	10	5.9	417.2108	16.33	sp|P02465|CO1A2_BOVIN
PGHPGKSGP	16.22	832.4191	9	13	417.2194	6.01	F1MZU6|F1MZU6_BOVIN
FTSYLGF	16.73	833.3959	7	8.4	417.7059	18.93
GPPGEPGPQ	21.77	834.3871	9	-1.5	418.1974	10.56
KCVSDRQ	15.82	834.4018	7	-8.2	418.2019	2.09
APAASPPGAP	20.9	834.4235	10	0.7	418.2165	28.79
STPDRLF	16.16	834.4235	7	1.7	418.2169	34.16	A0A3Q1M7S1|A0A3Q1M7S1_BOVIN:A0A3Q1M3V3|A0A3Q1M3V3_BOVIN:sp|P98133|FBN1_BOVIN
GPPGLPGLK	18.94	834.4963	9	1.8	418.2533	31.76	G3MZI7|G3MZI7_BOVIN:F1N0K0|F1N0K0_BOVIN
KMSADDGI	15.98	835.3746	8	9.9	418.6958	30.96
RGMVSMR	20.93	835.4156	7	-3.1	418.7109	10.4
GPQGPQGPV	17.59	835.4188	9	-0.7	418.7135	15.35	F1N0K0|F1N0K0_BOVIN:sp|Q28083|COBA1_BOVIN
VILPLPGQ	18.04	835.5167	8	0.2	418.7628	75.44
PGTPGSPGPA	15.73	836.4028	10	13.9	419.2116	7.91
RGGPEPGPA	22.62	836.414	9	-1.4	419.2108	7.56
GPAGPPGER	20.64	836.414	9	2.7	419.2125	8.34	G3MZI7|G3MZI7_BOVIN
ERGPGKGH	19.48	836.4253	8	-4.7	419.2151	0.6
PGTAGLPGAP	18.3	836.4392	10	4	419.2257	11.8
PGSPGRPGL	15.81	836.4504	9	-12.2	419.2245	31.7	sp|Q7SIB2|CO4A1_BOVIN
GPLGPPGSR	18.52	836.4504	9	-0.5	419.2294	10.53
GVPGVGVPGV	24.59	836.4756	10	-5.4	419.24	58.53	sp|P04985|ELN_BOVIN
ILDHNLL	22.18	836.4756	7	1.3	419.2428	49.77	sp|Q05443|LUM_BOVIN
GPVGLQGLP	18.72	836.4756	9	12.1	419.2473	21.88	G3MZI7|G3MZI7_BOVIN
PGVGVPGVGV	24.38	836.4756	10	14	419.248	17.52	sp|P04985|ELN_BOVIN
KSSSLDSD	19.15	837.3716	8	2.9	419.6914	14.31
GVPGQPGAR	17.12	837.4457	9	11.9	419.7322	0.91	F1MZU6|F1MZU6_BOVIN
LLDDHII	21.28	837.4596	7	0.5	419.7344	58.69
ILDHDLI	16.89	837.4596	7	0.8	419.7345	62.5
PMVPPGIK	32.87	837.4782	8	1.2	419.744	39.97	sp|Q05443|LUM_BOVIN
PGASGEPGAP	17.43	838.3821	10	-0.1	420.1954	8.23
PGARTPGPS	17.89	838.4297	9	1.6	420.2199	9.14
PGRSGVPGL	17.56	838.4661	9	-2.4	420.2364	24.29	F1N474|F1N474_BOVIN:A0A3Q1M0M2|A0A3Q1M0M2_BOVIN:A0A3Q1M970|A0A3Q1M970_BOVIN
VARATGPAP	17.68	838.4661	9	-0.4	420.2373	14.58
LPPDTALL	18.73	838.48	8	0.8	420.2447	70.33	sp|P21793|PGS2_BOVIN
IVGLPGQR	19.62	838.5024	8	2	420.2565	28.37
ERGPPGPM	30.6	839.3959	8	1.1	420.7028	13.58	sp|P02453|CO1A1_BOVIN
AGPKGADGAP	18.4	839.4137	10	1.1	420.7117	7.86	sp|P02453|CO1A1_BOVIN
GPAGPKGEK	18.25	839.4501	9	9.1	420.7333	0.84	sp|Q32S24|COBA2_BOVIN
GPPGFGRPG	19.15	840.4242	9	2.9	421.2177	18.3	F1MUC5|F1MUC5_BOVIN:A0A3Q1M4P8|A0A3Q1M4P8_BOVIN:A0A3Q1M0N0|A0A3Q1M0N0_BOVIN:A0A3Q1MUA3|A0A3Q1MUA3_BOVIN:A0A3Q1LXM2|A0A3Q1LXM2_BOVIN
PGSGLTVGPG	21.12	840.4341	10	-0.2	421.2214	10.91
LNRGPGDI	17.48	840.4453	8	-3.5	421.2256	17.51
GPTGPIGSR	34.57	840.4453	9	-0.9	421.2267	11.18	sp|P02465|CO1A2_BOVIN
GPAGLGLEK	17.36	840.4705	9	0.2	421.2397	23.03
LGAGPSVAAV	18.78	840.4705	10	1.4	421.2402	16.46
KGEAVPGAL	16.01	840.4705	9	2.7	421.2408	28.04
TSLLTHGL	15.19	840.4705	8	13.3	421.2452	27.91
PGFPDFY	15.3	841.3646	7	9.4	421.6906	13.91
GPSGEPGGKG	29.32	841.3929	10	3.6	421.7024	2.79	E1BKJ9|E1BKJ9_BOVIN
GPASASGPGAA	25.95	841.3929	11	9.3	421.7048	1.69
GQPGAVGEK	18.55	841.4293	9	-2.6	421.718	7.16
KGPSGDPGK	19.01	841.4293	9	8.6	421.7227	0.31	sp|P02465|CO1A2_BOVIN
DGDFYRA	15.62	842.3558	7	-0.3	422.1822	41.37	sp|P02465|CO1A2_BOVIN
PGSSGVDGAP	15.2	842.377	10	11.7	422.1978	6.29	Q08E14|Q08E14_BOVIN
ERGEQGPA	20.58	842.3882	8	-0.2	422.1984	4.98	sp|P02453|CO1A1_BOVIN
LQSGHSSQ	15.8	842.3882	8	-0.2	422.1984	3.96
QQGNPGSR	22.68	842.3995	8	6.7	422.207	11.37
GAPGFQGLP	15.85	842.4286	9	0.1	422.2187	14.9	F1N7Q7|F1N7Q7_BOVIN:A0A3Q1LZF7|A0A3Q1LZF7_BOVIN:A0A3Q1MPS8|A0A3Q1MPS8_BOVIN:A0A3Q1LT89|A0A3Q1LT89_BOVIN:A0A3Q1LLV2|A0A3Q1LLV2_BOVIN:A0A3Q1NK70|A0A3Q1NK70_BOVIN:F1MZU6|F1MZU6_BOVIN
KADVWPK	17.44	842.465	7	-3.4	422.2355	20.81
GPSGLPGFL	15.87	843.449	9	-0.2	422.7288	74.31
AVKDQQR	15.29	843.4562	7	-2	422.7317	0.79
AVDDIAKL	20.14	843.4702	8	-0.3	422.7393	60.08
YLDHNAL	19.5	844.4079	7	-0.1	423.2083	25.82	sp|P19879|MIME_BOVIN:A5D9E8|A5D9E8_BOVIN:Q3T085|Q3T085_BOVIN
HIDDKAF	24.38	844.4079	7	1.5	423.209	13.2	sp|Q05443|LUM_BOVIN
QMSVPQR	21.38	844.4225	7	-4.2	423.2139	14
AATAGIEAAA	18.22	844.429	10	0.7	423.2192	9.71
AVGGFPGLQ	27.66	844.4443	9	0.9	423.2269	26.92
QPGFGARN	16.58	845.4144	8	8.6	423.7152	13.93
FDGLAGLPG	18.83	845.4283	9	-0.8	423.7182	35.27	G3MZI7|G3MZI7_BOVIN
LGGVSFGPL	19.72	845.4647	9	14.7	423.7429	29.05
GTTLQDGR	17.36	846.4196	8	-5.4	424.2119	11.89
TGKHKGYG	23.52	846.4348	8	14	424.2277	6.22
GERGFPGE	30.06	847.3824	8	1.6	424.6963	14.99	sp|P02453|CO1A1_BOVIN
GPPGFGPGY	25.1	847.3864	9	2	424.6984	45.36
FSDVPGNN	18.71	848.3665	8	9.2	425.1915	70.1
GPASPGPPLG	22.44	848.4391	10	0.1	425.224	28.05
PGLPGVGGVP	16.07	848.4756	10	13.7	425.248	19.78	sp|P04985|ELN_BOVIN
VQRPGFF	21.65	849.4497	7	3.4	425.7307	30.63
SPPAASPGAP	15.22	850.4185	10	-9.8	426.2094	12.71
GFSGLDGAK	20.27	850.4185	9	0.6	426.2139	23.2	sp|P02453|CO1A1_BOVIN
GPVGPPGLTG	18.91	850.4548	10	13.6	426.2376	12.1
GPRGTPGPI	19.3	850.4661	9	-0.1	426.2374	14.09	F1N0K0|F1N0K0_BOVIN:sp|Q28083|COBA1_BOVIN
RNRGHGR	18.02	851.4586	7	8.1	426.7371	1.01
GPAGPQTPE	16.24	852.3977	9	-7.9	427.1998	9.99
GPKGDPGPE	21.75	852.3977	9	-3.4	427.2018	7.13	sp|C0HLN2|CO9A2_BOVIN
GPEQASPPA	18.71	852.3977	9	-1.8	427.2025	11.82
GPAGAAGQPGA	15.26	852.4089	11	8	427.2122	5.08	sp|P02465|CO1A2_BOVIN
GPAGPPGFPG	27.77	852.413	10	1.3	427.2114	39.63	sp|P02453|CO1A1_BOVIN
LGEAAAGPAP	15.63	852.4341	10	12.8	427.2268	28.63
GAPGPPGTSL	15.11	852.4341	10	13	427.2269	40.16	sp|Q32S24|COBA2_BOVIN
GLPGEAGPR	16.67	852.4453	9	-1.6	427.2263	9.04	F1N0K0|F1N0K0_BOVIN:sp|Q28083|COBA1_BOVIN
KMPDLHL	33.95	852.4528	7	1.9	427.2315	33.98	A0A3Q1MHT0|A0A3Q1MHT0_BOVIN:F1MCK2|F1MCK2_BOVIN:A0A3Q1NE82|A0A3Q1NE82_BOVIN
GPIGLDGKP	20.82	852.4705	9	12.6	427.245	22.24
FSNPVQY	15.96	853.397	7	3.5	427.7043	37.22	sp|P21793|PGS2_BOVIN
PGTAGGPGLK	16.29	853.4657	10	9.5	427.7412	29.41	sp|Q32S24|COBA2_BOVIN
GVRGEPGSP	24.42	854.4246	9	2	428.2175	7.22	F1N7Q7|F1N7Q7_BOVIN:A0A3Q1LZF7|A0A3Q1LZF7_BOVIN:A0A3Q1MPS8|A0A3Q1MPS8_BOVIN
KGANGAPGIA	24.2	854.461	10	-0.5	428.2346	33.79	sp|P02453|CO1A1_BOVIN
VDVNLPKA	19.79	854.4861	8	7	428.2504	31.32	A0A3Q1MHT0|A0A3Q1MHT0_BOVIN:F1MCK2|F1MCK2_BOVIN:A0A3Q1NE82|A0A3Q1NE82_BOVIN
VIGIGSGPR	20.42	854.4974	9	-4.3	428.2512	22.37
VILPVPAF	15.68	854.5266	8	1.6	428.2683	88.41
GPSGEPGKQ	19.04	855.4086	9	-0.8	428.7083	3.15	sp|P02453|CO1A1_BOVIN
GDVGVKGPAG	17.25	855.445	10	11.7	428.7318	9.31	F1MMG6|F1MMG6_BOVIN
GAPGKDGVR	30.73	855.4562	9	-2.7	428.7313	6.76	sp|P02453|CO1A1_BOVIN
KGSIGPQGL	15.22	855.4814	9	0.3	428.7451	7.1
FAGVPPIVG	15.57	855.4854	9	0.7	428.7474	40.66
GPTGFPGPK	29.8	856.4443	9	-3.2	429.2251	28.33	G3MZI7|G3MZI7_BOVIN
AVREAAAGL	19.13	856.4766	9	-2.4	429.2416	19.17
DGAKGDAGPA	18.77	857.3879	10	0.5	429.6985	4.1	sp|P02453|CO1A1_BOVIN
QGPETNGR	16.41	857.3991	8	-0.4	429.7037	4.94
PMGLMGPR	33.05	857.4252	8	0.1	429.717	32.04	sp|P02465|CO1A2_BOVIN
TGISVPGPM	36.99	857.4317	9	1.6	429.7209	52.49	sp|P02453|CO1A1_BOVIN
KTTTDMY	22.57	858.3793	7	12.7	430.1995	3.15
GDRGETGPA	24.93	858.3831	9	0.3	430.196	7.2	sp|P02453|CO1A1_BOVIN:Q08E14|Q08E14_BOVIN
GPSGFQGLP	22.7	858.4235	9	-1.1	430.2156	12.83
VGSKSPGMP	16.8	858.4269	9	-3	430.2165	13.88
KQFGVAPL	24.04	858.4963	8	0.6	430.2527	37.56	E1BB91|E1BB91_BOVIN
GLGGGSPGAST	16.49	859.4036	11	10.7	430.7107	36.65
LGPAEGTLC	16.66	859.4109	9	2.4	430.7108	36.77
VRGFPGPM	20.43	859.4374	8	2.6	430.7242	36.03
SYGYDEK	24.34	860.3552	7	-1.8	431.1812	11.74	sp|P02453|CO1A1_BOVIN
GLPGPIGPPG	22.62	860.4756	10	3.6	431.2437	52.26	sp|P02453|CO1A1_BOVIN
GIPGPIGPPG	22.62	860.4756	10	3.6	431.2437	52.26	F1N474|F1N474_BOVIN:A0A3Q1M0M2|A0A3Q1M0M2_BOVIN:A0A3Q1M970|A0A3Q1M970_BOVIN
GLPGPLGPPG	22.62	860.4756	10	3.6	431.2437	52.26	F1N2Y2|F1N2Y2_BOVIN:A0A3Q1LSX2|A0A3Q1LSX2_BOVIN
EGIMAGVGE	25.63	861.3902	9	-3.5	431.6979	30.27
GPPGKPGPR	16.22	861.4821	9	-3.4	431.7439	1.36	F1MJR6|F1MJR6_BOVIN:Q7M2X0|Q7M2X0_BOVIN
GQFDHFL	20.09	862.3973	7	0.3	432.2031	54.76
TGPIGPPGPA	37.88	862.4548	10	0.5	432.232	31.18	sp|P02453|CO1A1_BOVIN:Q08E14|Q08E14_BOVIN
GLPGPLGPR	16.78	862.5024	9	-2.7	432.2544	24.93
GLPGPRGIP	22.89	862.5024	9	-0.7	432.2552	29.87	sp|P02465|CO1A2_BOVIN
GIPGPRGLP	22.89	862.5024	9	-0.7	432.2552	29.87	F1N474|F1N474_BOVIN:A0A3Q1M0M2|A0A3Q1M0M2_BOVIN:A0A3Q1M970|A0A3Q1M970_BOVIN
GPGTAFSID	17.34	863.4025	9	-2	432.7047	44.06
GRVGPPGPAG	19.28	863.4613	10	1.3	432.7355	13.35	F1N2Y2|F1N2Y2_BOVIN:A0A3Q1LSX2|A0A3Q1LSX2_BOVIN:A0A3Q1LL95|A0A3Q1LL95_BOVIN:A0A3Q1MDT9|A0A3Q1MDT9_BOVIN:A0A3Q1MUF0|A0A3Q1MUF0_BOVIN
LGGFGGPGGF	15.54	864.413	10	-3.9	433.2091	30.73
PGAFEAAGF	15.05	865.397	9	13	433.7084	23.87
PGTPQFGY	21.33	865.397	8	13.6	433.7087	14.07
GPIGQPGIAG	19.01	865.4657	10	1.8	433.7379	37.25	F1N0K0|F1N0K0_BOVIN:sp|Q28083|COBA1_BOVIN
HDGGRYY	27.81	866.3671	7	-0.2	434.1877	8.66	sp|P02453|CO1A1_BOVIN
TLPGPTGAPG	16.23	866.4498	10	1.5	434.2299	37.58	F1N7Q7|F1N7Q7_BOVIN:A0A3Q1LZF7|A0A3Q1LZF7_BOVIN:A0A3Q1MPS8|A0A3Q1MPS8_BOVIN:A0A3Q1LT89|A0A3Q1LT89_BOVIN:A0A3Q1LLV2|A0A3Q1LLV2_BOVIN:A0A3Q1NK70|A0A3Q1NK70_BOVIN
GPVGERGPV	17.15	866.461	9	-0.3	434.2347	9.15	F1MMG6|F1MMG6_BOVIN
LGPPGEKGI	17.15	866.4861	9	0.2	434.2475	61.82	F1MZU6|F1MZU6_BOVIN
GLPGPSGIAV	20.78	866.4861	10	1.4	434.248	60.08	F1MJR6|F1MJR6_BOVIN:Q7M2X0|Q7M2X0_BOVIN
IVAPGKGIL	16.2	866.5589	9	-0.7	434.2834	31.97
GPAGERGAPG	15.96	867.4198	10	-1.7	434.7135	6.94	sp|P02453|CO1A1_BOVIN
PAPGADGQR	26.87	867.4199	9	-5	434.7121	15.53
GARGPEGPQ	23.16	867.4199	9	8.2	434.7178	7.29	F1N2Y2|F1N2Y2_BOVIN:A0A3Q1LSX2|A0A3Q1LSX2_BOVIN:A0A3Q1LL95|A0A3Q1LL95_BOVIN:A0A3Q1MDT9|A0A3Q1MDT9_BOVIN
PGADGVAGPK	41.42	867.445	10	1.4	434.7274	30.6	sp|P02453|CO1A1_BOVIN
GPAGLGPAQT	17.64	867.445	10	13.5	434.7327	10.42
GPKGDPGIAG	15.41	867.445	10	13.6	434.7327	9.41
GPSGPQGIR	31.68	867.4562	9	-2.9	434.7312	10.01	sp|P02465|CO1A2_BOVIN
PGKDGLPGK	17.52	867.4814	9	0.2	434.7451	13.87	A0A3Q1M1R0|A0A3Q1M1R0_BOVIN:A0A3Q1M906|A0A3Q1M906_BOVIN:F1MJY9|F1MJY9_BOVIN:A0A3Q1NK51|A0A3Q1NK51_BOVIN
QGLPGLNGL	17.09	867.4814	9	8.3	434.7486	27.09	F1MZU6|F1MZU6_BOVIN
GPYGPPGAPG	20.32	868.4078	10	-0.6	435.2079	40.81	E1BPV7|E1BPV7_BOVIN:A0A3Q1LYA4|A0A3Q1LYA4_BOVIN
GYPGPAGPPG	15.18	868.4078	10	0.6	435.2085	60.1	Q08E14|Q08E14_BOVIN
GPSGPPGFPG	15.64	868.4078	10	3.4	435.2097	83.23	F1N474|F1N474_BOVIN:A0A3Q1M0M2|A0A3Q1M0M2_BOVIN:A0A3Q1M970|A0A3Q1M970_BOVIN
GPSGLPGER	32.19	868.4402	9	0.1	435.2245	14.29	sp|P02465|CO1A2_BOVIN
AGPPGFPGAV	34.67	868.4443	10	-0.4	435.2263	50.86	sp|P02453|CO1A1_BOVIN
IGDGLGPAGL	17.35	868.4654	10	-2.3	435.236	24.45
TEAPLNPK	23.83	868.4654	8	1.8	435.2378	12.4
ATPALGSRP	16.81	868.4766	9	-13	435.237	43.72	F1MTP1|F1MTP1_BOVIN:A0A3Q1M646|A0A3Q1M646_BOVIN:A0A3Q1MT85|A0A3Q1MT85_BOVIN
GPPGFPGLE	15.24	869.4283	9	14.5	435.7247	17.51	F1MZU6|F1MZU6_BOVIN
GLPGADGRAG	29.16	869.4355	10	0.6	435.7223	15.01	sp|P02465|CO1A2_BOVIN
GKEGPPGTK	17.49	869.4606	9	12.8	435.7402	6.21	sp|Q32S24|COBA2_BOVIN
QVRDAGPK	16.67	869.4719	8	-1.5	435.7396	4.11
SGPGLGAGVR	17.67	869.4719	10	0.8	435.7406	12.34
GPRGEAGPM	15.48	870.4017	9	0.6	436.2054	9.45
PGYPGNPGL	29.41	870.4235	9	2.7	436.2172	45.13	sp|Q7SIB2|CO4A1_BOVIN
KAEAAPGPM	21.32	870.4269	9	11.3	436.2227	7.21
AVAETPAGR	15.39	870.4559	9	0.1	436.2323	24.67
LPGFGPGGVA	21.3	870.4599	10	-3.5	436.2327	48.02
GPVGVSWGL	16.89	870.46	9	-2.6	436.2332	82.44
LGEATPGGGGG	15.21	871.4035	11	7.9	436.7095	69.03
GDRGDAGPK	33.46	871.4147	9	-3.8	436.71	0.63	sp|P02453|CO1A1_BOVIN
GDQGPVGRS	23.15	871.4148	9	1.7	436.7124	7.88	sp|P02465|CO1A2_BOVIN
QGLHVYR	15.57	871.4664	7	14.3	436.7437	11.89
FKMPDVH	21.74	872.4214	7	0.9	437.2154	26.11	A0A3Q1MHT0|A0A3Q1MHT0_BOVIN:F1MCK2|F1MCK2_BOVIN:A0A3Q1NE82|A0A3Q1NE82_BOVIN
GPTGFQGLP	15.22	872.4392	9	1.1	437.2244	40.86
VMGPKGER	21.65	872.4538	8	3.2	437.2326	17.63
KGSLDVSAP	17.06	872.4603	9	-13.6	437.2285	5.63	A0A3Q1MHT0|A0A3Q1MHT0_BOVIN:F1MCK2|F1MCK2_BOVIN:A0A3Q1NE82|A0A3Q1NE82_BOVIN
VASGLKEGL	20.46	872.4967	9	0.1	437.2527	30.99
QSALKDVI	16.8	872.4967	8	14.5	437.259	17.23
GAPGFLRR	17.15	872.498	8	-13	437.2477	32.02
KAEAPGSSQ	18.02	873.4192	9	0.5	437.7141	3.83
PGPPGAPGPQ	33.76	873.4344	10	-2.5	437.7204	39.15	sp|P02453|CO1A1_BOVIN
GPAGPPGPPGA	21.51	873.4344	11	0.7	437.7218	62.92	Q08E14|Q08E14_BOVIN
PGADHPQPG	15.64	874.3933	9	4.1	438.2027	39.39
PGSPGYGLQ	22.9	874.4185	9	1.1	438.214	12.07	E1BPV7|E1BPV7_BOVIN
PGPEGPPGAP	29.02	874.4185	10	7.7	438.2169	18.76	F1MMG6|F1MMG6_BOVIN
GPSPASTFL	15.6	875.4388	9	1.7	438.7244	68.72
DFGLVAPGT	17.76	875.4388	9	11.1	438.7286	40.84
PGPAGPAGPR	18.89	875.4613	10	-3.6	438.7334	1.18	sp|P02465|CO1A2_BOVIN
SPPLLPPR	18.58	875.5228	8	2	438.7666	31.65
GLPGEPGPPG	29.75	876.4341	10	0.3	439.2214	39.81	sp|C0HLN2|CO9A2_BOVIN
GFVGEKGPS	20.86	876.4341	9	1.9	439.2221	22.38	sp|P02465|CO1A2_BOVIN
FSYYGKI	18.4	876.4381	7	0.5	439.2236	31.54
GQPRPHVS	17.74	876.4565	8	12.7	439.2381	61.06
LGPGPRPSP	15.42	876.4817	9	-13	439.2394	50.68
RGPAGGNIH	17.85	877.4518	9	-4	439.7285	5.51
FDGLVNLT	19.94	877.4545	8	0.6	439.7318	52.54	sp|Q05443|LUM_BOVIN
PGKPGPTGPA	17.17	877.4657	10	12.2	439.7425	13.22	sp|Q7SIB2|CO4A1_BOVIN
PGPAGVVGPQ	27.2	877.4657	10	13	439.7428	7.28
PGAVGPAGPR	32.26	877.4769	10	-4	439.741	1.1	sp|P02465|CO1A2_BOVIN
GFEPPSFV	24.66	878.4174	8	1.4	440.2136	75.24
RGFSGLDGA	25.22	878.4246	9	-2.3	440.2155	27.16	sp|P02453|CO1A1_BOVIN
ASTPPAAPAP	21.34	878.4497	10	-0.6	440.2289	24.02
GPPGLDGLPG	19	878.4497	10	7.2	440.2323	18.56	F1N7Q7|F1N7Q7_BOVIN:A0A3Q1LZF7|A0A3Q1LZF7_BOVIN:A0A3Q1MPS8|A0A3Q1MPS8_BOVIN:A0A3Q1LT89|A0A3Q1LT89_BOVIN:A0A3Q1LLV2|A0A3Q1LLV2_BOVIN:A0A3Q1NK70|A0A3Q1NK70_BOVIN
PTPDSLHL	15.64	878.4498	8	1.7	440.2299	34.58
GPLGERGPP	17.09	878.4609	9	0.9	440.2351	22.05
GLPGEPGPR	20.97	878.4609	9	1.7	440.2355	20.95	G3MZI7|G3MZI7_BOVIN
IDWFDGK	20.57	879.4127	7	0.8	440.7109	50.03
GGRGDFGSK	26.12	879.4199	9	-1.3	440.7136	6.62	Q1JQB0|Q1JQB0_BOVIN:F1MKG2|F1MKG2_BOVIN
PGVGGPSRGP	17.53	879.4562	10	-5.2	440.7301	0.6
PGKDGPPGR	23.38	879.4562	9	2.1	440.7333	8.55
IPDLLPGR	20.83	879.5178	8	1.4	440.7638	49.18
PGMPGKHGT	15.29	880.4225	9	-2.6	441.2144	19.29
RGPPGPMGL	27.81	880.4589	9	-1.2	441.2332	25.06	F1N0K0|F1N0K0_BOVIN:sp|Q28083|COBA1_BOVIN
PGPRGPMGL	18.81	880.4589	9	3.4	441.2352	26.84	A0A3Q1M1R0|A0A3Q1M1R0_BOVIN:A0A3Q1M906|A0A3Q1M906_BOVIN:F1MJY9|F1MJY9_BOVIN:A0A3Q1NK51|A0A3Q1NK51_BOVIN
GLPGRPGPM	23.68	880.4589	9	7.4	441.2369	20.69	sp|Q7SIB2|CO4A1_BOVIN
SLPLVDTH	21.26	880.4654	8	1.1	441.2375	43.91
VAATPSAPPA	15.36	880.4654	10	1.1	441.2375	45.28
GPVGLPGIDG	20.05	880.4654	10	12.3	441.2424	22.73	sp|P02465|CO1A2_BOVIN
GIDGRPGPI	31.51	880.4766	9	0.6	441.2428	25.46	sp|P02465|CO1A2_BOVIN
GLTRLGPAP	15.09	880.513	9	-2.1	441.2598	28.43
PGSPGENGAP	15.15	881.3879	10	12.8	441.7038	6.52	sp|P02453|CO1A1_BOVIN
GPRGDQGPV	26.56	881.4355	9	-0.7	441.7217	9.21	sp|P02465|CO1A2_BOVIN
GPKGEPGIQ	18.25	881.4606	9	-0.3	441.7344	10.62	F1MMG6|F1MMG6_BOVIN
GPKGEPGLQ	18.25	881.4606	9	-0.3	441.7344	10.62
GVVGLPGQR	30.62	881.5083	9	-3.2	441.757	24.05	sp|P02453|CO1A1_BOVIN
GPTGLPGDLG	24.27	882.4446	10	14.1	442.2328	14.99
GPSGRQGPK	16.1	882.4671	9	14.7	442.2443	22.28	F1MTP1|F1MTP1_BOVIN:A0A3Q1M646|A0A3Q1M646_BOVIN:A0A3Q1MT85|A0A3Q1MT85_BOVIN
RGAAGIPGGK	17.5	882.5035	10	-5.5	442.2536	6.33	sp|P02465|CO1A2_BOVIN
GPAADDPGGK	18.29	883.4035	10	-13.6	442.7	5.53
RGDGGPPGAT	27.84	883.4147	10	0.9	442.712	7.97	sp|P02465|CO1A2_BOVIN
GPPGFQGPK	35.81	883.4551	9	13.4	442.7378	17.64	sp|Q7SIB2|CO4A1_BOVIN
GDEGIQGLP	17.98	884.424	9	2.6	443.2174	15.53	A0A3Q1M1R0|A0A3Q1M1R0_BOVIN:A0A3Q1M906|A0A3Q1M906_BOVIN:F1MJY9|F1MJY9_BOVIN:A0A3Q1NK51|A0A3Q1NK51_BOVIN
RAEDGPAAV	15.63	884.4352	9	-0.8	443.2215	8.22
YGPPGAPGIG	16.74	884.4391	10	0.2	443.2239	43.95	E1BPV7|E1BPV7_BOVIN:A0A3Q1LYA4|A0A3Q1LYA4_BOVIN
GFPGLPGPSG	29.45	884.4391	10	2.2	443.2248	61.99	sp|P02453|CO1A1_BOVIN
GPSDRQLL	18.98	884.4716	8	1.8	443.2408	24.75
GPIGYPGPK	15.3	884.4756	9	0.3	443.2422	30.98	F1MTP1|F1MTP1_BOVIN:A0A3Q1M646|A0A3Q1M646_BOVIN:A0A3Q1MT85|A0A3Q1MT85_BOVIN
IIEPGMLL	15.64	884.5041	8	2.3	443.2573	87.22	G3MZI7|G3MZI7_BOVIN
WSLAHTAT	15.24	885.4344	8	-7	443.7184	5.04
AVSWAPGAQ	16.44	885.4344	9	2.4	443.7225	77.74
PGIEGPIGF	26.37	885.4596	9	7.9	443.7375	75.08	Q1JQB0|Q1JQB0_BOVIN:F1MKG2|F1MKG2_BOVIN
KPGGQGTGGK	15.23	885.4668	10	0.2	443.7377	5.89
QEGVQGLR	15.31	885.4668	8	2.3	443.7386	4.1	F1MTP1|F1MTP1_BOVIN:A0A3Q1M646|A0A3Q1M646_BOVIN:A0A3Q1MT85|A0A3Q1MT85_BOVIN
GNIGFPGPK	15.06	885.4708	9	3.8	443.7413	24.87	sp|P02465|CO1A2_BOVIN
GPAGMPGFPG	23.16	886.4007	10	-5.6	444.2021	9.03	Q08E14|Q08E14_BOVIN
PGFQGLPGD	15.67	886.4185	9	14.4	444.2198	74.38	F1N7Q7|F1N7Q7_BOVIN:A0A3Q1LZF7|A0A3Q1LZF7_BOVIN:A0A3Q1MPS8|A0A3Q1MPS8_BOVIN:A0A3Q1LT89|A0A3Q1LT89_BOVIN:A0A3Q1LLV2|A0A3Q1LLV2_BOVIN:A0A3Q1NK70|A0A3Q1NK70_BOVIN
GPMGLEGVQ	22.11	886.4218	9	12.7	444.2208	16.69	A0A3Q1M1R0|A0A3Q1M1R0_BOVIN:A0A3Q1M906|A0A3Q1M906_BOVIN:F1MJY9|F1MJY9_BOVIN:A0A3Q1NK51|A0A3Q1NK51_BOVIN
GFPGLRGPS	22.2	886.4661	9	1.4	444.2379	30.46	F1MTP1|F1MTP1_BOVIN:A0A3Q1M646|A0A3Q1M646_BOVIN:A0A3Q1MT85|A0A3Q1MT85_BOVIN
GPSAASSSGPA	15.8	887.3984	11	-0.5	444.7032	2.93
GSTPQDQR	16.36	887.4097	8	10.5	444.7137	1.2
GLPGFPGFP	15.43	887.4541	9	5.3	444.7336	88.03	F1MZU6|F1MZU6_BOVIN
LFGLEPGR	20.29	887.4865	8	2.2	444.7484	49.79
GEGPSVSAW	16.76	888.3977	9	12.4	445.2086	12.69
IGIGDMFH	28.97	888.4164	8	1.9	445.2133	61.02	Q1JQB0|Q1JQB0_BOVIN:F1MKG2|F1MKG2_BOVIN
ALPGDNVGF	22.15	888.4341	9	0.8	445.2216	54.54
GPGSSAPGFL	15.65	888.4341	10	14.2	445.2276	33.72
GVMGFPGPK	28.78	888.4528	9	-0.5	445.2304	41.97	sp|P02453|CO1A1_BOVIN:Q08E14|Q08E14_BOVIN
PGAPGPPGSPG	26.47	889.4293	11	-7.5	445.7155	33.76
SGPPGPPGPAG	26.21	889.4293	11	-0.2	445.7188	32.55	sp|P02465|CO1A2_BOVIN
PGPPGSPGPAG	24.64	889.4293	11	1.9	445.7197	56.57
LCDLGGVLT	18.43	889.4579	9	9.2	445.7373	37.17
APGAPGPVGPA	28.12	889.4657	11	1.1	445.7375	23.9	sp|P02453|CO1A1_BOVIN
APGAPGAPGPV	32.02	889.4657	11	2.8	445.7383	25.68	sp|P02453|CO1A1_BOVIN
GPYQAMPQ	17.6	890.3956	8	-3	446.2007	32.22
IDFDIIR	18.71	890.4861	7	1.4	446.2479	58.98
MGRVGCGGGV	15.44	891.4055	10	-14.1	446.7007	15.13
PGAVAPAGPR	20.28	891.4926	10	-3.8	446.7488	1.37
DGRGERGF	27.46	892.4151	8	1	447.2122	7.74
APDIDLHL	26.08	892.4654	8	1.8	447.2377	59.24	A0A3Q1MHT0|A0A3Q1MHT0_BOVIN:F1MCK2|F1MCK2_BOVIN:A0A3Q1NE82|A0A3Q1NE82_BOVIN
MTPGPSSAF	15.57	893.3953	9	-5.1	447.6996	76.88
CICKDKGQ	15.79	893.4099	8	-5.4	447.7068	4.03	F1MZU6|F1MZU6_BOVIN
GERGPPGPQ	19.06	893.4355	9	10.7	447.7267	13.02	sp|P02453|CO1A1_BOVIN:Q08E14|Q08E14_BOVIN
ELDVPPGPA	17.97	893.4494	9	14.7	447.7355	10.18
PGPQGVVGPS	17.73	893.4606	10	10.8	447.7393	10.64
GPLGPPGSRG	17.91	893.4719	10	-1.8	447.7393	10.64
AGLPGKPGPT	29.09	893.497	10	0.1	447.7527	14.44	sp|Q7SIB2|CO4A1_BOVIN
PVGPSGKGVP	15.05	893.497	10	0.9	447.7531	15.17
GLPGLPGRE	20.13	894.4922	9	0.6	448.2506	35.1
PGSPGISGPK	16.65	895.4763	10	-8.2	448.7387	10.18	Q08E14|Q08E14_BOVIN
GPRGEKGPV	15.24	895.4875	9	-0.1	448.7479	13.34
GERGPPGPM	38.34	896.4174	9	-1	449.2125	12.98	sp|P02453|CO1A1_BOVIN
GPEGGKGAAGP	19.28	896.4351	11	10.2	449.2263	0.98	Q08E14|Q08E14_BOVIN
LRGGEPGPD	20.92	896.4352	9	-0.5	449.2216	10.77
KGDAGAPGPQ	15.09	896.4352	10	14.1	449.2281	7.13
FDSFLLR	18.54	896.4756	7	1.5	449.2427	80.91
RGFPGLPGP	22.11	896.4868	9	1.2	449.2482	44.63	sp|P02453|CO1A1_BOVIN
LENLQNPA	16.89	897.4556	8	1.2	449.7325	11.56
PGTPGSPGTK	20.14	897.4556	10	2.9	449.7333	13.19	F1N7Q7|F1N7Q7_BOVIN:A0A3Q1LZF7|A0A3Q1LZF7_BOVIN:A0A3Q1MPS8|A0A3Q1MPS8_BOVIN:A0A3Q1LT89|A0A3Q1LT89_BOVIN:A0A3Q1LLV2|A0A3Q1LLV2_BOVIN
GPTGKDGIPG	16.14	897.4556	10	13.6	449.7381	10.25
GEVGQVGPR	27.11	897.4668	9	13.1	449.7435	6.26	F1N0K0|F1N0K0_BOVIN:sp|Q28083|COBA1_BOVIN
DEKLFTF	15.17	898.4436	7	0.6	450.2263	80.84
LFENYIT	15.13	898.4436	7	3.6	450.2276	37.81
DLGWNPVV	16.11	898.4548	8	7.8	450.2351	44.04
RPGLDGER	15.7	898.462	8	-11.5	450.2301	19.43	A0A3Q1M1R0|A0A3Q1M1R0_BOVIN:A0A3Q1M906|A0A3Q1M906_BOVIN:F1MJY9|F1MJY9_BOVIN:A0A3Q1NK51|A0A3Q1NK51_BOVIN
PGYPGPRGV	17.57	898.4661	9	-12.7	450.2315	52.59
VVGEVRGPS	22.9	898.4872	9	1.7	450.2485	22.65
GERGEQGPA	29.98	899.4097	9	-1.1	450.7085	6.03	sp|P02453|CO1A1_BOVIN
TSGPQSVPQ	15.77	899.4348	9	8.6	450.7255	9.7
DFSFLGSK	20.76	899.4388	8	3.7	450.7253	62.47
GSPGGLREAG	17.3	899.446	10	-0.1	450.7272	9.21
PGYPGGPGAK	23.92	899.4501	10	0	450.7292	14.59	sp|Q7SIB2|CO4A1_BOVIN
LGADIQGLD	18.02	900.4552	9	13.2	451.2377	26.36
TSLGPGAEGL	17.67	900.4552	10	14.4	451.2383	35.25
NIEDVIAQ	23.6	900.4553	8	3.1	451.2332	49.79
IGDGLKEGL	26.14	900.4916	9	-0.1	451.2499	40.82
PQFLPPGF	17.28	901.4697	8	1	451.7395	77.58
ETLLDAIK	22.62	901.512	8	0.2	451.7603	54.66
GEVKSVDGI	15.03	902.4709	9	-6.2	452.2368	62.34
GEKGETGLL	18.6	902.4709	9	1.3	452.2402	19.65	F1MZU6|F1MZU6_BOVIN
PFIDLHY	21.05	903.449	7	-0.6	452.7284	59.73
GIGDMFHE	26.1	904.3749	8	1.5	453.1923	50.69	Q1JQB0|Q1JQB0_BOVIN:F1MKG2|F1MKG2_BOVIN
PGPSRTGSF	15.58	904.4402	9	0.3	453.2245	22.69
YPGPGPGDF	19.61	905.3919	9	2.2	453.7011	60.06
EGPPGAPGPQ	23.3	905.4243	10	-1.6	453.7156	26.87
PGAPGPEGPQ	18.24	905.4243	10	3.1	453.7177	56.44	F1MMG6|F1MMG6_BOVIN
IDDHFLF	23.43	905.4283	7	-0.3	453.7182	70.51
TGASRAWAS	15.17	905.4355	9	13.4	453.728	19.5
GPPGPAGSPGL	17.39	905.4606	11	-14.4	453.728	19.5	E1BKJ9|E1BKJ9_BOVIN
PASPGPAGPR	16.61	905.4719	10	-3.4	453.7386	1.2
GVPGAVPGGVP	17.64	905.497	11	11.8	453.758	17.54	sp|P04985|ELN_BOVIN
RGVPGPPGAV	40.61	905.5082	10	-0.9	453.7579	18.74	sp|P02453|CO1A1_BOVIN
ADQHVPGSP	16.42	906.4195	9	-1.7	454.2131	12.29
VIQPLPIQ	24.98	906.5538	8	-0.1	454.281	61.92	G3MZI7|G3MZI7_BOVIN:sp|Q32S24|COBA2_BOVIN
PGEPGANGLP	27.89	907.4399	10	2.4	454.7252	15.83	Q08E14|Q08E14_BOVIN
GLPGVAGAPGL	18.51	907.5127	11	-0.3	454.7604	26.45	sp|P02465|CO1A2_BOVIN
PPGSDGLPGL	17.14	908.4603	10	0	455.2343	50.05	F1MZU6|F1MZU6_BOVIN
GEPGIPGIGL	15.69	908.4967	10	1.8	455.2533	65.92	F1N474|F1N474_BOVIN:A0A3Q1M0M2|A0A3Q1M0M2_BOVIN:A0A3Q1M970|A0A3Q1M970_BOVIN
LQVPDAPGL	16.24	908.4967	9	6.3	455.2554	62.23
SPVGVQPIL	19.81	908.5331	9	1.7	455.2715	62.28
PGSVPGGRPS	17.49	909.4668	10	0	455.7375	17.18
GPSGSPRPGV	16.39	909.4668	10	0.2	455.7376	10.83
GHNGLDGLK	31.76	909.4668	9	0.8	455.7379	14.99	sp|P02465|CO1A2_BOVIN
QPTKTPAAP	15.38	909.4919	9	5.7	455.7527	11.81
LGGAAPGTPGL	22.26	909.4919	11	6.1	455.7529	24.25
PGAVGLGGVSP	15.64	909.4919	11	12	455.7556	17.81	sp|P04985|ELN_BOVIN
GFPGPPGPEG	17.04	910.4185	10	-2.2	456.2124	44.88	F1MTP1|F1MTP1_BOVIN:A0A3Q1M646|A0A3Q1M646_BOVIN:A0A3Q1MT85|A0A3Q1MT85_BOVIN
PGFPGVPGSP	21.45	910.4548	10	-4	456.2298	87.8	F1N7Q7|F1N7Q7_BOVIN:A0A3Q1LZF7|A0A3Q1LZF7_BOVIN:A0A3Q1MPS8|A0A3Q1MPS8_BOVIN:A0A3Q1LT89|A0A3Q1LT89_BOVIN:A0A3Q1LLV2|A0A3Q1LLV2_BOVIN:A0A3Q1NK70|A0A3Q1NK70_BOVIN
EGVPTLAPQ	17.72	910.476	9	0.2	456.2422	53.15
VGEAVPTAAP	22.35	910.476	10	1.7	456.2429	58.52
MLGGPGPGLL	15.76	910.4946	10	-3	456.2501	81.26
DFCPPGYN	31.37	911.3483	8	2.3	456.6794	57.25	sp|P21793|PGS2_BOVIN
PVASPVVPF	15.12	911.5116	9	2.9	456.7613	87.68
DEFSFLR	20.48	912.4341	7	-0.6	457.2209	55.37
PGSVTSTPAP	20.12	912.4553	10	-4.5	457.2297	20.09
SFLPQPPQ	38.1	912.4705	8	0.3	457.2395	52.8	sp|P02453|CO1A1_BOVIN
KVPDVDIK	29.05	912.528	8	-0.8	457.2678	17.97	A0A3Q1MHT0|A0A3Q1MHT0_BOVIN:F1MCK2|F1MCK2_BOVIN:A0A3Q1NE82|A0A3Q1NE82_BOVIN
EGPASSQPAA	16.27	913.4141	10	9.9	457.7157	5.98
QDGREGPR	16.11	913.4365	8	14.5	457.729	11.47
PDVDLDLK	15.79	913.4756	8	-12.1	457.7365	17.94	A0A3Q1MHT0|A0A3Q1MHT0_BOVIN:F1MCK2|F1MCK2_BOVIN:A0A3Q1NE82|A0A3Q1NE82_BOVIN
GLWTGRPQ	19.66	913.477	8	13.2	457.7487	13.38
AVAQSPQTI	16.4	913.4869	9	0.7	457.7479	15.68
VAAATAPATAA	16.33	913.4869	11	0.9	457.748	15.31
GVAAIAGVGAE	29.39	913.4869	11	5.9	457.7503	50.8	Q08E14|Q08E14_BOVIN
QIIDAINK	19.89	913.5233	8	1.5	457.7664	31.17	E1BB91|E1BB91_BOVIN
STPATRDAP	17.19	914.4457	9	9.8	458.2315	45.55
GPMGLMGPR	31.26	914.4466	9	1.7	458.2282	36.36	sp|P02465|CO1A2_BOVIN
KGSSGPTGPK	17.33	914.4821	10	0.7	458.2455	3.03	G3MZI7|G3MZI7_BOVIN
GEKGSPGER	24.63	915.441	9	-8.9	458.7206	5.1
KGDKNGKGL	18.07	915.5137	9	-0.3	458.7609	12.8
KGSWSQAPG	26.25	916.4402	9	10.6	459.2291	1.44
EANRPGFGA	17.8	917.4355	9	-0.5	459.7216	8.45
PGKDQRSM	16.22	917.4389	8	-1.1	459.7231	49.48
GLEPGTTPF	17.25	917.4494	9	0.9	459.7292	62.9
PPGSPGPRGP	15.24	917.4719	10	-1.4	459.7394	15.11
RLPIGSYI	19.27	917.5334	8	-2.6	459.7697	48.97	sp|P19879|MIME_BOVIN:A5D9E8|A5D9E8_BOVIN:Q3T085|Q3T085_BOVIN
FDGDFYR	32.32	918.3871	7	2.3	460.1988	64.41	sp|P02465|CO1A2_BOVIN
FERDAGGPA	15.14	918.4195	9	-1.1	460.2134	9.69
GFVEQPPF	16.59	919.4439	8	0.8	460.7265	80.11
GTPGPPGPAGI	21.97	919.4763	11	2.8	460.7436	30.85
RGPVGPSGPP	19.93	919.4875	10	0.2	460.748	14.22	Q08E14|Q08E14_BOVIN
VGLPGPAGPVG	16.42	919.5127	11	8.6	460.7644	1.33	G3MZI7|G3MZI7_BOVIN
PGSPGLPGLQ	17.49	921.4919	10	3.1	461.7515	26.24	sp|Q7SIB2|CO4A1_BOVIN
PQPGLQPSV	21.26	921.4919	9	6.7	461.7532	53.03
GIPGAPGLIGA	24.62	921.5283	11	2.6	461.7695	70.85	Q08E14|Q08E14_BOVIN
PGARGSPGPQ	33.09	922.462	10	0.7	462.2354	7.23	Q08E14|Q08E14_BOVIN
KGHAGATGPK	18.84	922.4984	10	-1.3	462.2527	2.79	F1N474|F1N474_BOVIN:A0A3Q1M0M2|A0A3Q1M0M2_BOVIN:A0A3Q1M970|A0A3Q1M970_BOVIN
GPAGPPGFPGA	38.13	923.4501	11	0.1	462.7292	43.56	sp|P02453|CO1A1_BOVIN
KGHGALDAR	16.85	923.4937	9	-2.7	462.7497	0.11
IGPAGKEGPV	22.22	923.5076	10	11	462.763	23.51	sp|P02465|CO1A2_BOVIN
GQRGPTGPR	33.11	924.489	9	-0.7	463.2483	2.53	G3MZI7|G3MZI7_BOVIN:F1N0K0|F1N0K0_BOVIN:sp|Q28083|COBA1_BOVIN
PGEEGKRGP	16.56	925.4617	9	0.9	463.7354	17.98	F1N2Y2|F1N2Y2_BOVIN:A0A3Q1LSX2|A0A3Q1LSX2_BOVIN:A0A3Q1LL95|A0A3Q1LL95_BOVIN:A0A3Q1MDT9|A0A3Q1MDT9_BOVIN:A0A3Q1MUF0|A0A3Q1MUF0_BOVIN
GPPGFPGAVGA	23.92	925.4657	11	1.4	463.7376	51.82	sp|P02453|CO1A1_BOVIN
GERGPTGPR	34.13	925.473	9	0	463.7406	5.21	sp|Q32S24|COBA2_BOVIN
AGLEGPPGKT	38.23	925.4869	10	1.5	463.7482	13.35	G3MZI7|G3MZI7_BOVIN
VGPAAVPGGTT	23.56	925.4869	11	13.5	463.7538	15.23
GILGIPRSN	16.13	925.5345	9	-1	463.7709	32.01
KGEAGPSGPAG	23.47	926.4457	11	1	464.2274	6.34	sp|P02453|CO1A1_BOVIN
GELQAGAGGPA	15.14	926.4457	11	4.4	464.229	6.72
YYNKLIN	18.72	926.4861	7	0.7	464.2475	24.7
TESVGPLPK	34.02	926.5073	9	2.9	464.2591	19.46	sp|Q05443|LUM_BOVIN
VLSEGPRGL	16.74	926.5185	9	5.6	464.266	20.24
GPPGFGRPGS	31.11	927.4562	10	-1.5	464.7315	14.54	F1MUC5|F1MUC5_BOVIN:A0A3Q1M4P8|A0A3Q1M4P8_BOVIN:A0A3Q1M0N0|A0A3Q1M0N0_BOVIN:A0A3Q1MUA3|A0A3Q1MUA3_BOVIN:A0A3Q1LXM2|A0A3Q1LXM2_BOVIN
PGYPGRQGP	20.73	927.4562	9	0	464.7322	15.81	G3MZI7|G3MZI7_BOVIN:sp|Q32S24|COBA2_BOVIN:F1N0K0|F1N0K0_BOVIN:sp|Q28083|COBA1_BOVIN
TAQGLPDLN	15.89	927.4661	9	11.3	464.7424	24.62
DAVARATGPA	15	927.4774	10	1.6	464.7435	13.71
GGGGGGLGGGLGN	15.33	928.4362	13	9.1	465.2264	22.74
PGYPGEPGR	16.68	928.4402	9	4.7	465.2264	22.74	F1N474|F1N474_BOVIN:A0A3Q1M0M2|A0A3Q1M0M2_BOVIN:A0A3Q1M970|A0A3Q1M970_BOVIN
PGYPAGLGPT	15.21	928.4654	10	1.2	465.2374	26.07
EAGSQVPDAG	17.77	929.409	10	-1.6	465.7079	1.97
SGREGAPGAE	30.49	929.4202	10	0.5	465.7144	7.35	sp|P02453|CO1A1_BOVIN
QESLQAKQ	16.85	930.4771	8	8.5	466.2466	2.19
SGPAGALSSW	15.22	931.4399	10	12.1	466.7297	12.9	F1N1M2|F1N1M2_BOVIN
GLPGPAGPPGL	25.05	931.5127	11	3.2	466.7619	60.77
EFGFDGDF	16.6	932.3552	8	7.3	467.1851	80.94	sp|P02465|CO1A2_BOVIN
GPTGFQPET	21.19	932.424	9	13.4	467.2223	12.75
GPAGPPGPIGN	38.21	932.4716	11	0.8	467.2402	28.23	sp|P02453|CO1A1_BOVIN
ARMETVAR	16.94	932.4861	8	-11.6	467.2418	22.16
RAEPPVPPA	15.01	932.5079	9	-8.3	467.2542	62.39
KRGPPGPAGP	16.81	932.5192	10	10.4	467.2685	1.5	G3MZI7|G3MZI7_BOVIN
IAKDFIVK	23.92	932.5695	8	0.3	467.289	22.82	E1BI98|E1BI98_BOVIN
SVGSGMTPGAA	21.66	933.4225	11	4.7	467.7175	10.95
AGSTALSCPK	16.9	933.4589	10	-3.8	467.7318	10.15
GPVGPQGLLP	20.34	933.5283	10	11.3	467.7735	20.87
GLPGPRGPAL	15.94	933.5396	10	-0.6	467.7736	27.23
GPAGPSGAPGPA	21.32	934.4508	12	12.3	468.2352	7.81	Q08E14|Q08E14_BOVIN
PGYGPPPGPP	15.06	934.4548	10	-0.2	468.2314	20.82
GAPGAIGAPGPA	15.58	934.4872	12	2.2	468.2487	40.5	sp|P02465|CO1A2_BOVIN
RDKPGSYI	15.25	934.4872	8	10.1	468.2524	3.95
PMVPPLGGPA	17.41	934.4946	10	4.7	468.2536	13.31
RGVQGPPGPA	37.66	934.4984	10	-2	468.2523	11.01	sp|P02453|CO1A1_BOVIN:G3MZI7|G3MZI7_BOVIN
RGRPGAPGPA	17.24	934.5096	10	-0.3	468.2588	7.13	sp|P02453|CO1A1_BOVIN
RGPSGPPGPD	35.06	935.446	10	0.3	468.7272	9.71	sp|P02465|CO1A2_BOVIN
PGERGPPGAV	21.97	935.4824	10	-0.7	468.745	15.1	A0A3Q1MBH5|A0A3Q1MBH5_BOVIN:A0A3Q1MIV7|A0A3Q1MIV7_BOVIN:A0A3Q1LN20|A0A3Q1LN20_BOVIN:A0A3Q1MCD1|A0A3Q1MCD1_BOVIN:E1BFN9|E1BFN9_BOVIN:A0A3Q1M376|A0A3Q1M376_BOVIN
DGRPGPIGPA	25.72	935.4824	10	0.6	468.7456	21.88	sp|P02465|CO1A2_BOVIN
PGDRGLPGPA	16.15	935.4824	10	2.1	468.7462	37.55
LPQPPQEK	18.27	935.5076	8	-7.6	468.7543	14.43	sp|P02453|CO1A1_BOVIN
VGVPGVGVPGV	32.83	935.544	11	1.1	468.7766	71.13	sp|P04985|ELN_BOVIN
PGSQGIPGPQ	15.24	936.4664	10	9	469.2415	7.06
GPSGPPGAKGL	22.44	936.5028	11	0	469.2555	6.83	F1MTP1|F1MTP1_BOVIN:A0A3Q1M646|A0A3Q1M646_BOVIN:A0A3Q1MT85|A0A3Q1MT85_BOVIN
VPMVPPGIK	33.3	936.5466	9	2.1	469.2784	36.91	sp|Q05443|LUM_BOVIN
AHDGGRYY	25.27	937.4042	8	0	469.7062	7.96	sp|P02453|CO1A1_BOVIN
AAAVQDPPAV	17.87	937.4869	10	12.1	469.7532	12.04
GLPGIDGRPG	15.63	937.4981	10	3	469.7545	34.11	sp|P02465|CO1A2_BOVIN
GPRGLPGER	23.67	937.5093	9	-0.2	469.7586	9.9	sp|P02453|CO1A1_BOVIN
GLPGERGRP	17.22	937.5093	9	0.1	469.7588	9.21	sp|P02453|CO1A1_BOVIN
APVAVAAATAP	19.66	937.5233	11	14.4	469.7724	25.3
DFGFSNGPV	18.03	938.4133	9	13.4	470.217	35.41
MPDVDLHL	20.02	938.4531	8	1	470.2311	70.1	A0A3Q1MHT0|A0A3Q1MHT0_BOVIN:F1MCK2|F1MCK2_BOVIN:A0A3Q1NE82|A0A3Q1NE82_BOVIN
RGPSGPQGPS	24.33	938.457	10	-0.5	470.2323	7.42	sp|P02453|CO1A1_BOVIN
GPAGASVVGPQ	22.06	938.4821	11	3.3	470.2467	9.88
PGPSGKDGPK	16.66	938.4821	10	8.5	470.2491	0.51
PGQDGLAGPK	15.16	938.4821	10	8.8	470.2493	0.69
APGGPYGPPAG	30.02	939.4449	11	0.8	470.7269	37.91	A0A3Q1N2S6|A0A3Q1N2S6_BOVIN:A5D7S6|A5D7S6_BOVIN
PGADATVGPR	15.99	939.4774	10	13.6	470.7491	7.07
GRASVPASPV	15.86	939.5137	10	-0.5	470.7607	22.44
VGPAGLGLEK	17.6	939.5389	10	0.4	470.7737	29.93
IGGALAVGSVP	15.61	939.5389	11	4.3	470.7755	37.47
RGDQGPVGR	20.71	940.4838	9	-4.2	471.244	6.45	sp|P02465|CO1A2_BOVIN
RGDKGVPGR	18.36	940.5202	9	5	471.2665	7.62	F1N7Q7|F1N7Q7_BOVIN:A0A3Q1LZF7|A0A3Q1LZF7_BOVIN:A0A3Q1MPS8|A0A3Q1MPS8_BOVIN:A0A3Q1LT89|A0A3Q1LT89_BOVIN:A0A3Q1LLV2|A0A3Q1LLV2_BOVIN:A0A3Q1NK70|A0A3Q1NK70_BOVIN
LLDMLPGSP	16.08	941.4892	9	10.1	471.7534	40.65
RGEKGEPGL	19.27	941.493	9	2.2	471.7516	19.07	sp|Q7SIB2|CO4A1_BOVIN
GPIGYPGPKG	22.52	941.497	10	-4.7	471.7503	24.58	F1MTP1|F1MTP1_BOVIN:A0A3Q1M646|A0A3Q1M646_BOVIN:A0A3Q1MT85|A0A3Q1MT85_BOVIN
PPGPPGPPGAV	25.35	941.497	11	12.5	471.7585	48.1	F1MUC5|F1MUC5_BOVIN:A0A3Q1M4P8|A0A3Q1M4P8_BOVIN:A0A3Q1M0N0|A0A3Q1M0N0_BOVIN:A0A3Q1MUA3|A0A3Q1MUA3_BOVIN:A0A3Q1LXM2|A0A3Q1LXM2_BOVIN
GPLGPYGPKG	18.32	941.497	10	13.6	471.759	24.89	A0A3Q1M1R0|A0A3Q1M1R0_BOVIN:A0A3Q1M906|A0A3Q1M906_BOVIN:F1MJY9|F1MJY9_BOVIN:A0A3Q1NK51|A0A3Q1NK51_BOVIN
PGAGARFPGI	16.59	941.5082	10	-3.6	471.7565	62.72	sp|P04985|ELN_BOVIN
EGGKPGDQGV	15.16	942.4406	10	10.8	472.2294	1.15
GQKGTVEPQ	20.35	942.4771	9	11	472.2477	2.46
LGVPGSPGFL	15.4	942.5175	10	-3.7	472.261	80.79
AALQSGGGGGGL	15.24	943.4723	12	2.7	472.7415	12.8
PGIPGPFFL	21.78	943.5167	9	10.1	472.7672	71.06
RLDSNALR	16.65	943.5199	8	1.4	472.7647	10.21
PGPIGPPGPR	36.74	943.5239	10	1.3	472.7666	38.96	sp|P02453|CO1A1_BOVIN:Q08E14|Q08E14_BOVIN
GLVGGSATGLL	16.02	943.5338	11	12.4	472.7768	25.55
ADWTPGPSD	15.46	944.3876	9	2.6	473.199	0.46
STGISVPGPM	41.13	944.4637	10	2.7	473.2372	52.26	sp|P02453|CO1A1_BOVIN
GLPGFPGFPG	18.75	944.4755	10	-1.2	473.2412	30.82	F1MZU6|F1MZU6_BOVIN
FADIPNLR	30.05	944.5079	8	1.9	473.2589	45.06	sp|P19879|MIME_BOVIN:A5D9E8|A5D9E8_BOVIN:Q3T085|Q3T085_BOVIN
SGDRGETGPA	32.92	945.4152	10	0.3	473.7118	7.13	sp|P02453|CO1A1_BOVIN:Q08E14|Q08E14_BOVIN
TCVIGGDGKP	15.97	945.4589	10	9	473.7378	9.06
EGKGEGLKE	23.51	945.4767	9	12.6	473.7484	5.87
GEKGETGLR	15.65	945.4879	9	0.1	473.748	7.33	sp|P02465|CO1A2_BOVIN
GPIGPPGPAGQ	17.1	946.4872	11	-2.5	474.2465	25.54	Q08E14|Q08E14_BOVIN
FDGLIFVH	16.19	946.4912	8	-1.2	474.2491	49.05
PAGPAGPAGPR	19.05	946.4984	11	5.5	474.2559	4.28	sp|P02465|CO1A2_BOVIN
STAPPPLPPA	15.01	946.5123	10	-1.7	474.2594	69.16
GPEPPAPGIL	21.66	946.5123	10	12	474.2659	43.4
ELPVESFK	16.19	947.4963	8	0.3	474.7523	39.24	A6QQQ3|A6QQQ3_BOVIN:sp|Q9GKN8|PRELP_BOVIN
SPAQPPGPAK	19.21	948.5028	10	12.2	475.2612	7.03
GRPGPIGPAGA	33.98	948.514	11	0.3	475.2612	14.96	sp|P02465|CO1A2_BOVIN
PGALGDPGLPG	24.58	949.4868	11	-4.1	475.7455	25.13	A0A3Q1M1R0|A0A3Q1M1R0_BOVIN:A0A3Q1M906|A0A3Q1M906_BOVIN:F1MJY9|F1MJY9_BOVIN:A0A3Q1NK51|A0A3Q1NK51_BOVIN
HLDDLPGAL	30.15	949.4869	9	3.2	475.749	51.56	sp|P01966|HBA_BOVIN:A0A1K0FUD3|A0A1K0FUD3_BOVIN:A0A452DIQ5|A0A452DIQ5_BOVIN
LILDHNLL	20.45	949.5596	8	1	475.7843	74.86	sp|Q05443|LUM_BOVIN
PGAPGPGGPSGT	22.08	950.4457	12	14.2	476.2336	69.46
PGPEGMPGLP	23.08	950.4531	10	7.8	476.2343	46.22	F1MUC5|F1MUC5_BOVIN:A0A3Q1M4P8|A0A3Q1M4P8_BOVIN:A0A3Q1M0N0|A0A3Q1M0N0_BOVIN
PGEPGLPGMP	25.68	950.4531	10	13.5	476.237	31.28	F1MZU6|F1MZU6_BOVIN
RGRPGLPGAA	32.79	950.541	10	0.3	476.2747	10.4	Q08E14|Q08E14_BOVIN
KGDPGPPGPM	23.32	951.4484	10	11.9	476.7339	12.38
GPTTPASGPAP	17.74	951.4661	11	11.5	476.7426	10.52
QPLQQNGAP	15.58	951.4774	9	-2	476.7417	9.98
RGMPGLPGPA	18.69	951.496	10	2.6	476.7533	18.87	F1N2Y2|F1N2Y2_BOVIN:A0A3Q1LSX2|A0A3Q1LSX2_BOVIN:A0A3Q1LL95|A0A3Q1LL95_BOVIN:A0A3Q1MDT9|A0A3Q1MDT9_BOVIN:A0A3Q1MUF0|A0A3Q1MUF0_BOVIN
AAEQGLPPGL	22.3	951.5025	10	2.6	476.7565	45.69
GPPQPDSGAQ	15.46	952.425	10	-9.5	477.212	30.27
PGPSGEPGKQ	32.78	952.4614	10	2.1	477.2357	33.87	sp|P02453|CO1A1_BOVIN
EGPKGSPGPQ	16.44	952.4614	10	10.9	477.2399	7.56	F1N474|F1N474_BOVIN:A0A3Q1M0M2|A0A3Q1M0M2_BOVIN:A0A3Q1M970|A0A3Q1M970_BOVIN
PSGASGPAGPR	17.53	952.4726	11	6.7	477.2435	1.84	sp|P02453|CO1A1_BOVIN
KPNHSQSR	16.41	952.4839	8	-11.3	477.2406	8.48
KGEAGLPGKP	17.75	952.5341	10	-5.7	477.2683	8.12	sp|Q7SIB2|CO4A1_BOVIN
GPPGYPGPRG	15.03	953.4719	10	-0.3	477.7398	18.54
FLPQPPQE	34.52	954.481	8	-0.2	478.2444	43.81	sp|P02453|CO1A1_BOVIN
GRDGLQGPVG	15.56	954.4883	10	12.6	478.2542	8.43	G3MZI7|G3MZI7_BOVIN
SGPSGLPGER	25.12	955.4723	10	11.2	478.7455	9.36	sp|P02465|CO1A2_BOVIN
PGPSGFQGLP	15.76	955.4763	10	-3.1	478.7407	28.25
PGIQGFPGPS	15.68	955.4763	10	2.8	478.7435	62.22
GPTCLPINAA	16.4	955.4797	10	8.7	478.748	21.54
EGLRGPRGD	26.76	955.4835	9	0.6	478.746	8.61	sp|P02465|CO1A2_BOVIN
RGPDENIR	22.13	955.4835	8	0.9	478.7462	7.84
KGHFGPINS	17.96	955.4875	9	-1.3	478.7472	2.71
GLDGLPGASGL	16.73	955.4974	11	-2.5	478.7515	19.38	F1N7Q7|F1N7Q7_BOVIN:A0A3Q1LZF7|A0A3Q1LZF7_BOVIN:A0A3Q1MPS8|A0A3Q1MPS8_BOVIN:A0A3Q1LT89|A0A3Q1LT89_BOVIN:A0A3Q1LLV2|A0A3Q1LLV2_BOVIN:A0A3Q1NK70|A0A3Q1NK70_BOVIN
LGFAARGPAP	16.64	955.5239	10	11.2	478.7713	31.56
VSEYTKCQ	17.06	956.4273	8	-0.9	479.2172	3.39
DGGRYYRA	22.63	956.4464	8	3.8	479.229	10.35	sp|P02453|CO1A1_BOVIN
QKPSNEGVV	15.37	956.4927	9	1.8	479.2512	9.01
GAPGNDGAKGD	26.42	957.4152	11	-2.4	479.7104	0.64	sp|P02453|CO1A1_BOVIN
DGNTLPTPSG	17.01	957.4403	10	10.7	479.7293	14.69
GLPGPIGPPGP	19.43	957.5283	11	1.3	479.7688	60.54	sp|P02453|CO1A1_BOVIN
GIPGPIGPPGP	19.43	957.5283	11	1.3	479.7688	60.54	F1N474|F1N474_BOVIN:A0A3Q1M0M2|A0A3Q1M0M2_BOVIN:A0A3Q1M970|A0A3Q1M970_BOVIN
GLPGPLGPPGP	19.43	957.5283	11	1.3	479.7688	60.54	F1N2Y2|F1N2Y2_BOVIN:A0A3Q1LSX2|A0A3Q1LSX2_BOVIN
NQMSVPQR	15.17	958.4655	8	-3	480.2353	14.58
AGVMGFPGPK	35.38	959.4899	10	3.3	480.7505	41.11	sp|P02453|CO1A1_BOVIN
AVPTPGPGPPA	18.46	959.5076	11	0.1	480.7578	64.82
PGPVSPAAPPA	16.83	959.5076	11	12.6	480.7638	54.34
RGPAGPPGPR	17.6	960.5253	10	-3.6	481.2649	46.14	W0SK50|W0SK50_BOVIN
PLGNVYVSI	15.67	960.528	9	11.9	481.2737	56.18
EHLTCCEQ	16.44	961.3633	8	3.8	481.6875	54.19
ITREPSFI	24.33	961.5233	8	1.3	481.7662	52.57
GPTGPIGPPGL	28.69	961.5233	11	1.8	481.7665	57.33	F1N7K7|F1N7K7_BOVIN
GPEGMNYPV	17.18	962.4167	9	12.6	482.2184	38.77
GIPGEDGYR	34.93	962.4457	9	0.2	482.2269	21.34	E1BB91|E1BB91_BOVIN
VAPEEPGPAP	19.75	962.4708	10	-3.1	482.2379	28.12
QPGSPGPAGVP	16.9	962.4821	11	3.3	482.2466	23.41	sp|Q7SIB2|CO4A1_BOVIN
RGVPGPPGAVG	15.35	962.5297	11	1	482.2693	18.38	sp|P02453|CO1A1_BOVIN
GPLGPSGLPGL	19.7	963.5389	11	-1.8	482.7726	75.45
GIPGPAGISVP	18.88	963.5389	11	1.2	482.774	78.74
FLSPPPPPL	17.69	963.5429	9	1.7	482.7762	80.79
PGAGDGGIPGPA	18.07	964.4614	12	-13.1	483.2284	28.27
DDKHIPGSP	15.42	964.4614	9	14.7	483.2417	44.42
YPHITFST	16.17	964.4654	8	-13.9	483.2299	28.64
GPDYKGCLI	16.31	964.4688	9	-3.9	483.2365	66.46
GAPGEPGAPGR	16.9	964.4726	11	-6.4	483.2372	9.39
FDSGLKAEV	16.51	964.4865	9	0.9	483.2477	49.71
APGTPGPQGIA	21.56	964.4977	11	11.1	483.2582	3.32	sp|P02453|CO1A1_BOVIN
GVPGQPGSPGL	17.61	964.4977	11	12.3	483.2588	14.45	F1N474|F1N474_BOVIN:A0A3Q1M0M2|A0A3Q1M0M2_BOVIN:A0A3Q1M970|A0A3Q1M970_BOVIN
PGKDGLPGPQ	15.25	964.4977	10	14.5	483.2598	2.06
PGPKGERGPA	15.62	964.509	10	0.9	483.2589	13.31	W0SK50|W0SK50_BOVIN
KGPMGPPGPK	19.1	964.5164	10	-0.7	483.2618	0.33	W0SK50|W0SK50_BOVIN
RVPGRVGPQ	17.98	964.5566	9	-13.1	483.276	16.46
GEVIQPLPI	24.18	964.5593	9	-0.8	483.2832	80.19	G3MZI7|G3MZI7_BOVIN:sp|Q32S24|COBA2_BOVIN:F1N0K0|F1N0K0_BOVIN
PAGPPGFPGAV	35.02	965.497	11	0.2	483.7526	54.69	sp|P02453|CO1A1_BOVIN
ILDHNLLE	25.68	965.5182	8	1.5	483.7638	51.14	sp|Q05443|LUM_BOVIN
FGFDGDFY	29.28	966.3759	8	0.9	484.1924	79.06	sp|P02465|CO1A2_BOVIN
KGPPGDDGPK	15.29	966.477	10	14.4	484.2494	7.1	G3MZI7|G3MZI7_BOVIN:F1N0K0|F1N0K0_BOVIN
RPAGLSPGRG	18.15	966.5359	10	-10.6	484.2668	14.97
SPHAANPFQ	16.98	967.4512	9	1	484.73	17.42
PGPRGEAGPM	17.16	967.4545	10	-1.8	484.7304	10.42
GASAGQAPPGGV	17.9	967.4723	12	5.7	484.7429	45.53
PGFPGVPGSPG	15.04	967.4763	11	10.2	484.747	14.35	F1N7Q7|F1N7Q7_BOVIN:A0A3Q1LZF7|A0A3Q1LZF7_BOVIN:A0A3Q1MPS8|A0A3Q1MPS8_BOVIN:A0A3Q1LT89|A0A3Q1LT89_BOVIN:A0A3Q1LLV2|A0A3Q1LLV2_BOVIN:A0A3Q1NK70|A0A3Q1NK70_BOVIN
KGAPGEKGPQ	20.64	967.5087	10	0.9	484.7588	28.27	G3MZI7|G3MZI7_BOVIN:F1N0K0|F1N0K0_BOVIN:sp|Q28083|COBA1_BOVIN
GFAPISGMCS	15.04	968.4095	10	11.1	485.2141	43.11
KGNQGPSGPQ	17.26	968.4675	10	-8.6	485.2336	2.18	sp|Q32S24|COBA2_BOVIN
RGDSGPPGRA	18	968.4788	10	-2.2	485.2423	1.18
KGPRGETGPA	23.14	968.5039	10	2.7	485.2572	2.87	sp|P02453|CO1A1_BOVIN
GKEGLRGPR	16.26	968.5515	9	-1.8	485.2789	4.77	sp|P02465|CO1A2_BOVIN
APAEGSASPSP	17.14	969.4403	11	6.6	485.7273	5.49
GPPGFPGERG	24.64	969.4668	10	1.3	485.738	19.98	F1N474|F1N474_BOVIN:A0A3Q1M0M2|A0A3Q1M0M2_BOVIN:A0A3Q1M970|A0A3Q1M970_BOVIN
KGENGKPGPS	18.69	969.4879	10	4.1	485.7499	9.08	Q08E14|Q08E14_BOVIN
GPAGAGGAAAVAT	18.07	969.4879	13	13.7	485.7546	26.4
VAAQSLPGPM	17.31	969.4954	10	12.5	485.7577	30.95
DGAPGKDGVR	34.72	970.4832	10	0.7	486.2459	7.37	sp|P02453|CO1A1_BOVIN
GPYGPSGLPGA	22.33	971.4712	11	11.3	486.7451	16.04	A0A3Q1M1R0|A0A3Q1M1R0_BOVIN:A0A3Q1M906|A0A3Q1M906_BOVIN:F1MJY9|F1MJY9_BOVIN:A0A3Q1NK51|A0A3Q1NK51_BOVIN
PGLPGPPGPPS	24.49	971.5076	11	-5.7	486.755	27.2
SHGPPPPGMP	18.85	972.4487	10	0.7	487.2287	36.06
ASRATAPGKD	16.09	972.4988	10	7	487.2568	1.52
GPGAPGGTPPAP	20.79	974.4821	12	11.6	488.2507	87.83
GVPGPPGAVGPA	38.98	974.5185	12	1.1	488.2637	36.77	sp|P02453|CO1A1_BOVIN
GFDGDFYR	30.62	975.4086	8	2.4	488.7094	39.16	sp|P02465|CO1A2_BOVIN
KDFLNGPAD	15.38	975.4661	9	12.3	488.743	31.88
PGLPGEPGPVG	27.96	975.5025	11	13.2	488.7616	44.71	F1N474|F1N474_BOVIN:A0A3Q1M0M2|A0A3Q1M0M2_BOVIN:A0A3Q1M970|A0A3Q1M970_BOVIN
PGLPGDPGIPG	21.17	975.5025	11	13.2	488.7616	44.71	F1MZU6|F1MZU6_BOVIN
PGLPGDPGLPG	21.17	975.5025	11	13.2	488.7616	44.71
TRPSPGPPPA	16.28	975.5137	10	-2.4	488.7596	25.03
PGLPGPRGEP	17.63	975.5137	10	3.8	488.7626	41.55
PGPLLASWH	15.43	976.513	9	3.4	489.2621	45.33
LDNFLDKL	18.23	976.5229	8	-0.6	489.2651	67.2
GPTGPIGKPGP	18.98	976.5341	11	2.9	489.2724	16.47
VGVGGPGIPGAP	26.45	976.5341	12	12.3	489.277	18.54	sp|P04985|ELN_BOVIN
LPVLPPKLT	20.17	976.6321	9	1.1	489.3205	59.47	sp|P19879|MIME_BOVIN:A5D9E8|A5D9E8_BOVIN:Q3T085|Q3T085_BOVIN
NPEDFIPF	20.08	977.4494	8	3.1	489.7301	81.44
GPPGAPGIGQQ	19.71	977.493	11	-1	489.7499	7.69	E1BPV7|E1BPV7_BOVIN:A0A3Q1LYA4|A0A3Q1LYA4_BOVIN
PGIDGRPGPI	38.34	977.5294	10	1.1	489.7691	56.95	sp|P02465|CO1A2_BOVIN
VIQPLPIQA	32.76	977.5909	9	-0.2	489.7993	69.29	G3MZI7|G3MZI7_BOVIN
RAEPGPQGAP	20.53	978.4882	10	2.8	490.2494	15.87
AGIGAPGSPGPV	18.5	978.5134	12	10.9	490.266	14.36
VTAPDIDLH	20.55	979.4974	9	2.3	490.7538	40.12	A0A3Q1MHT0|A0A3Q1MHT0_BOVIN:F1MCK2|F1MCK2_BOVIN:A0A3Q1NE82|A0A3Q1NE82_BOVIN
PAGGPGFPGAPG	17.25	980.4715	12	6.1	491.2426	41.36
GWPAAPAGGPT	15.8	980.4716	11	-5.6	491.237	8.78
ATAAASPGPAPA	17.07	980.4927	12	1.6	491.251	13.71
GPYGPPGAPGI	16.16	981.4919	11	-0.3	491.7498	58.79	E1BPV7|E1BPV7_BOVIN:A0A3Q1LYA4|A0A3Q1LYA4_BOVIN
GVLAASPTPGL	15.51	981.5494	11	1.1	491.7792	32.46
LTEAPLNPK	25.53	981.5494	9	4.2	491.7807	19.56
QNASTHTPQ	16.08	982.4468	9	-6.2	492.2243	0.65
LGGSRASPAPA	16.92	982.5195	11	5	492.2661	16.53
GAKGANGAPGIA	15.35	982.5195	12	8.1	492.2677	69.85	sp|P02453|CO1A1_BOVIN
ARQASLPGSP	15.12	982.5195	10	14.1	492.2706	78
PRHTITSAT	19.81	982.5196	9	12.9	492.2701	24.34
FGGRPIPGSP	21.79	983.5188	10	-1.4	492.7626	48.55
RGFPGLPGPS	30.01	983.5188	10	0.2	492.7634	44.4	sp|P02453|CO1A1_BOVIN
PPQERDPF	18.3	984.4664	8	-0.6	493.2368	64.9
ELGAPGSAGVAG	17.05	984.4875	12	10.9	493.2531	11.87
QGPTGFPGPK	15.13	984.5028	10	11.2	493.2608	9.36	G3MZI7|G3MZI7_BOVIN
DGAKGDAGAPGA	15.3	985.4464	12	1	493.7276	3.03	sp|P02453|CO1A1_BOVIN
KNSPQAGTLA	16.53	985.5192	10	-1.7	493.7627	2.59
MPDFDLHL	26.45	986.4531	8	0.3	494.2306	78.64	A0A3Q1MHT0|A0A3Q1MHT0_BOVIN:F1MCK2|F1MCK2_BOVIN:A0A3Q1NE82|A0A3Q1NE82_BOVIN
LDQSAKYY	24.68	986.4709	8	12.6	494.2456	12.36
VGSTPQDQR	20.36	986.4781	9	-0.4	494.2427	1.39
QIFYTGFI	19.01	987.5065	8	-2.4	494.756	59.13
FDGDFYRA	17.43	989.4243	8	1	495.7165	55.63	sp|P02465|CO1A2_BOVIN
MPGPPGPPGSP	21	989.464	11	4.1	495.7379	7.05	F1MZU6|F1MZU6_BOVIN
PAPIGTQGIH	23.15	989.5294	10	-6.9	495.7652	41.02
GDAGAPGVQGY	18.45	990.4406	11	0.3	496.2244	15.58	sp|C0HLN2|CO9A2_BOVIN
VGPGPSPGPLN	29.1	990.5134	11	0.8	496.261	28.62	G3N346|G3N346_BOVIN
GPSGPPGRPGL	18.95	990.5247	11	-0.3	496.2661	19.04
LPGKPGPTGPA	16.86	990.5498	11	10	496.2838	23.07	sp|Q7SIB2|CO4A1_BOVIN
GLPGVQGPPGL	15.68	990.5498	11	14.6	496.286	37.47
PGPSGVPPGMP	15.99	991.4797	11	-2.4	496.7426	28.66
GERGVPGPPGA	28.93	992.5039	11	-1.4	497.2552	16.22	sp|P02453|CO1A1_BOVIN
KDEIDVKF	16.36	992.5178	8	10.3	497.2679	27.18
LPSAAGPAGPR	15.76	992.5403	11	13.4	497.2807	1.8
PMGPRGEPGP	15.76	993.4702	10	-9.8	497.7341	48.29	W0SK50|W0SK50_BOVIN
PPGADGQPGAK	46.84	993.4879	11	4.4	497.75	10.02	sp|P02453|CO1A1_BOVIN
AQPSPELGVP	15.67	993.5131	10	11.5	497.7661	19.07
VALRGPPGPM	42.3	993.543	10	1.3	497.776	35.63	sp|Q32S24|COBA2_BOVIN
PAGSEGPARGP	15.17	994.4832	11	-0.4	498.2452	3.33
RGLGPGVSPR	16.2	994.5671	10	0.7	498.2878	11.78
PTDEFFLK	39.19	995.4963	8	-1.1	498.7515	48.44	E1BB91|E1BB91_BOVIN
IGVLDIYGF	16.3	995.5327	9	6.2	498.7733	65.96
APGGPYGPPAGG	21.22	996.4664	12	2	499.2381	35.99	A0A3Q1N2S6|A0A3Q1N2S6_BOVIN:A5D7S6|A5D7S6_BOVIN
ACSPVPSPGSP	18.2	997.4539	11	-0.3	499.7306	73.35
TDGPKGAAGPAG	15.17	997.4828	12	7.2	499.7489	1.04
SPGFPGVPGSP	19.66	997.4868	11	11.8	499.7532	29.71	F1N7Q7|F1N7Q7_BOVIN:A0A3Q1LZF7|A0A3Q1LZF7_BOVIN:A0A3Q1MPS8|A0A3Q1MPS8_BOVIN:A0A3Q1LT89|A0A3Q1LT89_BOVIN:A0A3Q1LLV2|A0A3Q1LLV2_BOVIN:A0A3Q1NK70|A0A3Q1NK70_BOVIN
GPAGSRGATGPA	28.92	997.4941	12	1.4	499.7516	7.22	sp|P02465|CO1A2_BOVIN
QGPNGFPGPK	21.73	997.4981	10	5	499.7554	28.09	sp|Q32S24|COBA2_BOVIN
GVGTPGAAGGVR	15.65	997.5305	12	8.3	499.7733	7.03
QEVTQPGAGL	15.77	998.5032	10	0.9	500.2559	31.73
GPAGPRGHPGP	18.99	998.5046	11	-8.5	500.2519	16.96
GCRLTLPGPS	18.29	999.5172	10	-2.7	500.7611	35.95
FKMPDLHL	15.8	999.5211	8	1.2	500.765	64.3	A0A3Q1MHT0|A0A3Q1MHT0_BOVIN:F1MCK2|F1MCK2_BOVIN:A0A3Q1NE82|A0A3Q1NE82_BOVIN
GGGGKGSWGAAP	18.39	1000.4726	12	-2.3	501.239	10.79	W0SK50|W0SK50_BOVIN
PMVPPGIKY	41.59	1000.5416	9	5.7	501.2775	56.82	sp|Q05443|LUM_BOVIN
SPSTVRDGPS	17.54	1001.4778	10	2.1	501.7438	45.76
GPPGPPGAPGKA	22.3	1001.5294	12	-7.7	501.7646	69.01
ISGPPGPPGPAG	19.02	1002.5134	12	4.2	502.2626	29.08	sp|P02465|CO1A2_BOVIN
PGSPGPIGPAGP	21.53	1002.5134	12	5.2	502.2631	29.58	F1MZU6|F1MZU6_BOVIN
GPSGPNGPPGPA	19	1003.4723	12	0.9	502.7404	16.76	sp|P02465|CO1A2_BOVIN
SIQGGGQPGGF	16.01	1003.4723	11	1.8	502.7409	33.86
GERGFPGER	29.64	1003.4835	9	-4.1	502.7436	10.25	sp|P02453|CO1A1_BOVIN
PPGLGVSGPGPA	15.03	1004.5291	12	-3.5	503.2666	49.04
GPPGPPGPPSF	16.19	1005.4919	11	12.4	503.756	72.78
LPGDPGIPGSP	17.08	1005.5131	11	-6.1	503.7573	72.44	F1MZU6|F1MZU6_BOVIN
WEIQPSTF	18.07	1006.476	8	4.7	504.2442	72.9	sp|P21793|PGS2_BOVIN
PGTAPSGVPGAP	22.09	1006.5083	12	-3.7	504.2561	24.38
RGFSGLDGAK	33.99	1006.5195	10	-0.2	504.2635	16.6	sp|P02453|CO1A1_BOVIN
KDFIFQPL	17.74	1006.5487	8	3.9	504.2802	75.61
IDVPDVDVH	32.08	1007.4924	9	-0.6	504.7497	47.54	A0A3Q1MHT0|A0A3Q1MHT0_BOVIN:F1MCK2|F1MCK2_BOVIN:A0A3Q1NE82|A0A3Q1NE82_BOVIN
PGARARRGPA	16.44	1007.5736	10	0.5	504.7909	1.39
IDWFDGKE	15.36	1008.4552	8	-2	505.2304	54.02
SNLQPPPGAE	18.2	1008.4876	10	5.6	505.2505	89.24
MPKFSVPGF	28.96	1008.5103	9	0.6	505.2593	64.12	A0A3Q1MHT0|A0A3Q1MHT0_BOVIN:F1MCK2|F1MCK2_BOVIN:A0A3Q1NE82|A0A3Q1NE82_BOVIN
GPLGGPEVKR	15.47	1008.5716	10	-1.2	505.289	28.18
PGPMGLPGIDG	19.36	1009.4902	11	-3.1	505.7474	50.43	A0A3Q1M1R0|A0A3Q1M1R0_BOVIN:A0A3Q1M906|A0A3Q1M906_BOVIN:F1MJY9|F1MJY9_BOVIN:A0A3Q1NK51|A0A3Q1NK51_BOVIN
PSPGAMLGPSP	20.21	1009.4902	11	9	505.7535	57.31
KGSPGIGIGAPG	27.31	1009.5556	12	0.4	505.7818	8.09	A0A3Q1M1R0|A0A3Q1M1R0_BOVIN:A0A3Q1M906|A0A3Q1M906_BOVIN:F1MJY9|F1MJY9_BOVIN:A0A3Q1NK51|A0A3Q1NK51_BOVIN
APGSPPEAGASA	18.22	1010.4669	12	-0.3	506.2371	28.78
EQHIPGSPF	15.31	1010.4821	9	0.7	506.2452	44.24
GIPGAKGELGL	26.29	1010.576	11	2.1	506.2929	31.77
AYRAPPPGPS	17.92	1011.5137	10	7.1	506.7643	65.98
AAGPSRPSCPA	15.49	1012.476	11	-1.3	507.2411	11.16
KGDPDAISGPG	17.96	1012.4825	11	2.7	507.2464	3.07
ERSREPGSP	17.48	1013.489	9	4.3	507.7505	36.67
PGSMLRGDSP	19.51	1015.4756	10	-12.7	508.7352	59.88
PSHPAGLPGSP	23.57	1015.5087	11	-0.2	508.758	36.77
GPTGPIGPPGPA	32.08	1016.5291	12	-1.2	509.2677	41.08	Q08E14|Q08E14_BOVIN
GPVGLPGPAGPV	25.48	1016.5654	12	-0.4	509.2863	66.77	G3MZI7|G3MZI7_BOVIN
PGLPGAGGPVVP	17.95	1016.5654	12	0.6	509.2868	59.84
IGIGDMFHE	18.98	1017.4589	9	1.3	509.7339	72.39	Q1JQB0|Q1JQB0_BOVIN:F1MKG2|F1MKG2_BOVIN
DFGLPFPPE	19.49	1017.4807	9	7.8	509.7481	43.66
WKTPFDPK	32.9	1017.5283	8	2.5	509.7692	30.93	A0A0A0MP88|A0A0A0MP88_BOVIN:sp|A2I7M9|SPA32_BOVIN:sp|Q9TTE1|SPA31_BOVIN:A0A3Q1N535|A0A3Q1N535_BOVIN:A0A452DJK6|A0A452DJK6_BOVIN:Q28921|Q28921_BOVIN
GPTGPPGIGLPG	15.86	1018.5447	12	-0.5	510.2759	53.17	A0A3Q1M1R0|A0A3Q1M1R0_BOVIN:A0A3Q1M906|A0A3Q1M906_BOVIN:F1MJY9|F1MJY9_BOVIN:A0A3Q1NK51|A0A3Q1NK51_BOVIN
GPVGPPGLTGPA	15.47	1018.5447	12	13.9	510.2832	16.67
GPAGPRGPAGPS	20.9	1019.5148	12	-0.4	510.761	10.15	sp|P02465|CO1A2_BOVIN
GPRGPAGPSGPA	40.73	1019.5148	12	1.2	510.7618	9.39	sp|P02465|CO1A2_BOVIN
GPAARGPGPGPS	16.78	1019.5148	12	7.1	510.7648	77.19
GPIGPVGQPGAA	21.25	1019.5399	12	12.4	510.7801	15.37	sp|Q32S24|COBA2_BOVIN
GAPGPMGPPGSP	16.33	1020.4698	12	11.8	511.2447	27.53	F1N474|F1N474_BOVIN:A0A3Q1M0M2|A0A3Q1M0M2_BOVIN:A0A3Q1M970|A0A3Q1M970_BOVIN
GPAGPAGLMGPP	19.1	1020.5062	12	-2.5	511.2556	49.57	F1N0K0|F1N0K0_BOVIN:sp|Q28083|COBA1_BOVIN
CGPLPGPAGPR	19.43	1020.5175	11	8.6	511.2669	4.02
ASPGPAPSLAPG	15.84	1020.5239	12	10.6	511.2712	14.19
PTARAPSPGAP	22.74	1020.5352	11	-2.5	511.2701	18.17
PGVSGIPGAPGL	29.75	1020.5604	12	1.4	511.2847	66.23	sp|Q7SIB2|CO4A1_BOVIN
GPLGPLGKEGP	15.41	1020.5604	11	2.6	511.2853	27.78
APGTPGPQGIAG	18.8	1021.5192	12	11.7	511.7694	3.99	sp|P02453|CO1A1_BOVIN
PGAAGPAGGSGPAG	15.7	1022.4781	14	9	512.2474	29.25	Q08E14|Q08E14_BOVIN
SPGGLDPNGPI	16.88	1022.5032	11	-11.5	512.2495	62.61
GPAGPPGFPGAV	47.99	1022.5185	12	-0.4	512.2628	55.05	sp|P02453|CO1A1_BOVIN
LGREAGVPPGA	19.16	1022.5508	11	0.7	512.2795	26.39
GSPAPTLARPG	15.13	1022.5508	11	1.5	512.28	4.1
GPPGLPGPKGF	20.44	1022.5549	11	3.2	512.2828	37.41	F1N7Q7|F1N7Q7_BOVIN:A0A3Q1LZF7|A0A3Q1LZF7_BOVIN:A0A3Q1MPS8|A0A3Q1MPS8_BOVIN:A0A3Q1LT89|A0A3Q1LT89_BOVIN:A0A3Q1LLV2|A0A3Q1LLV2_BOVIN:A0A3Q1NK70|A0A3Q1NK70_BOVIN
GLRGPSGIPGL	17.18	1022.5872	11	1	512.2979	39.28	F1MJR6|F1MJR6_BOVIN:Q7M2X0|Q7M2X0_BOVIN
PGAGDCGDCDD	23.98	1023.291	11	2.8	512.6507	69.98
PGSVGAPGSAGAP	15.29	1023.4985	13	11.5	512.7589	14.06
LGAPGSAGVAGPA	16.74	1023.5349	13	12	512.7773	7.44
SVPMVPPGIK	37.36	1023.5787	10	1	512.7936	39.93	sp|Q05443|LUM_BOVIN
EGKDPAAPGSP	16.69	1024.4824	11	12.2	513.2512	10.64
YGQGPPPPGGV	17.41	1024.4978	11	-0.1	513.2526	46.28	A0A3Q1N2S6|A0A3Q1N2S6_BOVIN:A5D7S6|A5D7S6_BOVIN
DAVARATGPAP	19.88	1024.5302	11	11.8	513.2749	17.07
PGAPFLPGAGAA	16.22	1024.5342	12	1.9	513.2719	41.94
GEKGAPGADGPA	38.97	1025.4778	12	-0.1	513.7426	8.78	sp|P02453|CO1A1_BOVIN
ISMPDVDLH	38.27	1025.4851	9	1.1	513.7469	54.08	A0A3Q1MHT0|A0A3Q1MHT0_BOVIN:F1MCK2|F1MCK2_BOVIN:A0A3Q1NE82|A0A3Q1NE82_BOVIN
PPPPPPQPEA	18.48	1025.5182	10	-0.2	513.7628	43.84
LSFLPQPPQ	24.06	1025.5546	9	3.6	513.7829	73.04	sp|P02453|CO1A1_BOVIN
RIITGPEIK	19.42	1025.6233	9	0.7	513.8158	17.51
RVGINTDRP	19.81	1026.557	9	-10	514.2772	21.87
LGVSTGAVVPQ	15.94	1026.5709	11	-7.6	514.2853	34.01	sp|P04985|ELN_BOVIN
PAQGTSGDPGAA	16.07	1027.457	12	9.8	514.7373	6.06
GSRGDGGPPGAT	33.03	1027.4683	12	-7	514.7343	7.76	sp|P02465|CO1A2_BOVIN
SPGWIGDGIK	31.28	1028.5291	10	-1.8	515.2673	41.24	A0A3Q1M7S1|A0A3Q1M7S1_BOVIN:A0A3Q1M3V3|A0A3Q1M3V3_BOVIN:sp|P98133|FBN1_BOVIN
GPIGSPGLQGF	18.55	1028.5291	11	1.4	515.269	23.18	F1N7Q7|F1N7Q7_BOVIN:A0A3Q1LZF7|A0A3Q1LZF7_BOVIN:A0A3Q1MPS8|A0A3Q1MPS8_BOVIN:A0A3Q1LT89|A0A3Q1LT89_BOVIN:A0A3Q1LLV2|A0A3Q1LLV2_BOVIN:A0A3Q1NK70|A0A3Q1NK70_BOVIN
GPAGPPGPVGPAG	15.03	1029.5243	13	-7.2	515.7622	71.9
PPPPPPQPGF	19.16	1029.5283	10	1.2	515.7686	72.21
DAGAPGVQGYP	16.88	1030.4719	11	11.7	516.2457	16.69	sp|C0HLN2|CO9A2_BOVIN
SMPDPLPEF	29.04	1031.4634	9	13.2	516.7422	81.93	F1N2Y2|F1N2Y2_BOVIN:A0A3Q1LSX2|A0A3Q1LSX2_BOVIN:A0A3Q1LL95|A0A3Q1LL95_BOVIN:A0A3Q1MDT9|A0A3Q1MDT9_BOVIN:A0A3Q1MUF0|A0A3Q1MUF0_BOVIN
PGAGGPVVPGPGA	19.81	1031.5399	13	-10	516.7686	37.37
GPAGPPGPIGNV	40.3	1031.5399	12	2.2	516.7748	40.81	sp|P02453|CO1A1_BOVIN
GPPGPIGNVGAP	17.22	1031.5399	12	10.1	516.7789	15.59	sp|P02453|CO1A1_BOVIN
LGERGPPGPPG	16.04	1032.5352	11	0.1	517.2714	27.78
GLPGPRGEPGP	19.84	1032.5352	11	4.2	517.2735	49.52
GLTGPIGPPGPA	36.91	1032.5603	12	1.3	517.2845	52.64	sp|P02453|CO1A1_BOVIN
EKGEPGPPGPA	16.4	1034.5032	11	-0.4	518.2551	20.62
GPPGAEGLPGSP	20.11	1034.5032	12	0.2	518.2554	22.42	sp|Q7SIB2|CO4A1_BOVIN
ERGVPGPPGAV	38.32	1034.5508	11	-3.4	518.2773	24.38	sp|P02453|CO1A1_BOVIN
PGLAGSPGLPGI	18.54	1034.576	12	4.5	518.2941	75.52	F1MZU6|F1MZU6_BOVIN
GPPGTPGSPGVN	20.81	1035.4985	12	-0.6	518.7527	10.05
GPAGERGAPGPA	20.32	1035.5096	12	0	518.7585	8.34	sp|P02453|CO1A1_BOVIN
DRGGPGPAGPR	20.44	1035.521	11	-10.5	518.7588	4.07	Q08E14|Q08E14_BOVIN
YLPVLPGDY	23.82	1035.5277	9	3	518.7692	79.73
GPPGAAGEKGVP	18.41	1035.5349	12	2.8	518.7726	11.84	sp|Q32S24|COBA2_BOVIN
GPSAELHGLR	15.05	1035.5461	10	-0.8	518.7764	13.99
EVIQPLPIQ	24.22	1035.5964	9	2.1	518.803	70.41	G3MZI7|G3MZI7_BOVIN:sp|Q32S24|COBA2_BOVIN
DLYGQAAQAT	15.06	1036.4825	10	10.1	519.2502	42.57
TGGPVHLEDL	17.49	1036.5189	10	11.5	519.2692	62.37
GPAGGKGPKGDP	18.71	1036.5302	12	9.5	519.2737	0.52	F1MMG6|F1MMG6_BOVIN
GLPGEVLGAQP	15.89	1036.5553	11	0.7	519.2817	26.26	F1N7Q7|F1N7Q7_BOVIN:A0A3Q1LZF7|A0A3Q1LZF7_BOVIN:A0A3Q1MPS8|A0A3Q1MPS8_BOVIN:A0A3Q1LT89|A0A3Q1LT89_BOVIN:A0A3Q1LLV2|A0A3Q1LLV2_BOVIN:A0A3Q1NK70|A0A3Q1NK70_BOVIN
GPFNQGPPGAP	16.2	1037.493	11	-7.8	519.7462	9.85
IDTPDIDIH	35.97	1037.5029	9	1.1	519.7557	47.08	A0A3Q1MHT0|A0A3Q1MHT0_BOVIN:F1MCK2|F1MCK2_BOVIN:A0A3Q1NE82|A0A3Q1NE82_BOVIN
RGPRGDQGPV	29.76	1037.5366	10	-2.1	519.7709	7.63	sp|P02465|CO1A2_BOVIN
KPEAVLPGDI	15.91	1037.5757	10	1.2	519.7922	78.33
EAREAAAPGPA	15.8	1038.5094	11	0	520.2584	12.97
GPYGPPGAPGIG	17.63	1038.5134	12	0.7	520.2608	45.41	E1BPV7|E1BPV7_BOVIN:A0A3Q1LYA4|A0A3Q1LYA4_BOVIN
LMGPRGPPGAS	16.23	1038.5281	11	-4.7	520.2653	24.63	sp|P02465|CO1A2_BOVIN
PGSVDLQPVQ	16.44	1038.5345	10	10.9	520.2767	23.58
GPPGLQGFPGL	27.21	1038.5498	11	-3.6	520.2767	30.51	F1N7Q7|F1N7Q7_BOVIN:A0A3Q1LZF7|A0A3Q1LZF7_BOVIN:A0A3Q1MPS8|A0A3Q1MPS8_BOVIN:A0A3Q1LT89|A0A3Q1LT89_BOVIN:A0A3Q1LLV2|A0A3Q1LLV2_BOVIN:A0A3Q1NK70|A0A3Q1NK70_BOVIN
MPKFSMPGF	20.03	1040.4823	9	-3.3	521.2432	60.83	A0A3Q1MHT0|A0A3Q1MHT0_BOVIN:F1MCK2|F1MCK2_BOVIN:A0A3Q1NE82|A0A3Q1NE82_BOVIN
FRPDNFVF	16.9	1040.5079	8	2.4	521.2589	64.89
SRPGSSIPGSP	18.55	1040.525	11	5.9	521.2693	40.93
PGTAGLPGAPGF	24.46	1040.5291	12	6.3	521.2715	27.98
GFPGLRGPSGP	31.53	1040.5403	11	-0.9	521.2734	40.62	F1MTP1|F1MTP1_BOVIN:A0A3Q1M646|A0A3Q1M646_BOVIN:A0A3Q1MT85|A0A3Q1MT85_BOVIN
AVSVSSGAPGLP	15.7	1040.5502	12	-5.1	521.2761	32.14
LQEKEAGPGL	15.58	1040.5502	10	-1.4	521.2781	27.48
SFLPQPPQE	44.54	1041.5131	9	1.7	521.7611	58.52	sp|P02453|CO1A1_BOVIN
GPTGPKGEPGF	23.37	1042.5083	11	7.8	522.2619	18.8	F1MJR6|F1MJR6_BOVIN
MPDVDLNLK	39.84	1043.5321	9	2.3	522.7709	48.54	A0A3Q1MHT0|A0A3Q1MHT0_BOVIN:F1MCK2|F1MCK2_BOVIN:A0A3Q1NE82|A0A3Q1NE82_BOVIN
GLPGPPGAPGPQ	42.81	1043.5399	12	1.3	522.7744	39.42	sp|P02453|CO1A1_BOVIN
FAQPALPGFP	17.7	1043.5439	10	13	522.7825	77.62
HQVLPLPLQ	15.07	1043.6128	9	-1	522.8096	46.55
GLPGPPGPPGEA	16.7	1044.5239	12	1.2	523.2663	41.54	A0A3Q1LSX2|A0A3Q1LSX2_BOVIN:A0A3Q1MDT9|A0A3Q1MDT9_BOVIN:A0A3Q1MUF0|A0A3Q1MUF0_BOVIN
PGPRPSPLGPA	19.52	1044.5715	11	0.3	523.2896	49.47
PQSPAQPPGPA	20.52	1045.5192	11	14.1	523.7706	10.22
GFDGDFYRA	33.6	1046.4457	9	0.6	524.2269	47.06	sp|P02465|CO1A2_BOVIN
ASTPPAAPAPPA	15.9	1046.5396	12	3.1	524.2751	38.54
GPAGPRGPVGPS	24.35	1047.5461	12	1.6	524.7776	13.76	Q08E14|Q08E14_BOVIN
ASPGPPGPRRG	16.16	1047.5574	11	10.7	524.788	17.45
GPAGPIGPVGAR	35.99	1047.5825	12	0.5	524.7952	22.49	sp|P02453|CO1A1_BOVIN
SPVGPPGTPGSP	16.13	1048.5189	12	-5.3	525.2604	84.4
PVDSPGPAGPR	22.81	1048.5302	11	-5.3	525.266	3.9
PGPSITGVPGPA	15.44	1048.5553	12	-1.3	525.2806	49.98	A0A3Q1M1R0|A0A3Q1M1R0_BOVIN:A0A3Q1M906|A0A3Q1M906_BOVIN:F1MJY9|F1MJY9_BOVIN:A0A3Q1NK51|A0A3Q1NK51_BOVIN
GPKGAQGLPGAP	21.61	1048.5665	12	-1.4	525.2862	26.8	F1MZU6|F1MZU6_BOVIN
IDGRPGPIGPA	38.87	1048.5665	11	-0.6	525.2866	25.4	sp|P02465|CO1A2_BOVIN
DFGVSLYCF	18.03	1049.4528	9	-0.2	525.73	71.6
GPAGPKGEPGSP	15.65	1049.5142	12	13.4	525.7678	76.75	sp|P02453|CO1A1_BOVIN
IEVRDHGQP	16.87	1049.5254	9	1.9	525.7674	17.21
PGERGRPGAPG	15.05	1049.5366	11	7.9	525.7761	16.12	sp|P02453|CO1A1_BOVIN
PQVPAQVPSQ	20.97	1049.5505	10	0.4	525.7792	41.48
GPSGIPGLQGPA	20.3	1049.5505	12	2.2	525.7801	14.03	F1MJR6|F1MJR6_BOVIN:Q7M2X0|Q7M2X0_BOVIN
PGLGPALGSPGK	23.7	1049.5869	12	0.5	525.7974	28.22
GPEGGKGAAGPPG	18.86	1050.5094	13	-1.8	526.2574	11.78	Q08E14|Q08E14_BOVIN
RGGASPGQPPQ	15.64	1050.5206	11	9.5	526.269	5.74
VPGPMGPSGPR	39.13	1050.5281	11	0.3	526.2679	18.35	sp|P02453|CO1A1_BOVIN
SVSGPPGLPGSP	16.46	1050.5345	12	-1	526.2704	62.87	F1MUC5|F1MUC5_BOVIN:A0A3Q1M4P8|A0A3Q1M4P8_BOVIN:A0A3Q1M0N0|A0A3Q1M0N0_BOVIN:A0A3Q1MUA3|A0A3Q1MUA3_BOVIN:A0A3Q1LXM2|A0A3Q1LXM2_BOVIN
PAVSVEAGGPAP	19.54	1050.5345	12	10.2	526.2763	38.32
PRSDRPPGAV	16.98	1050.557	10	-12.6	526.2756	19.04
GAPGAPGFPGPK	17.64	1051.545	12	-5.6	526.7733	0.69	F1N474|F1N474_BOVIN:A0A3Q1M0M2|A0A3Q1M0M2_BOVIN:A0A3Q1M970|A0A3Q1M970_BOVIN
PPGYQPPNLA	17.15	1052.5291	10	-1	527.2677	54.51
ARWLGEGPAP	17.62	1052.5403	10	9.6	527.2789	19.37
PGLDGASGLPGI	16.4	1052.5502	12	0.3	527.2789	70.62	F1MUC5|F1MUC5_BOVIN:A0A3Q1M4P8|A0A3Q1M4P8_BOVIN:A0A3Q1M0N0|A0A3Q1M0N0_BOVIN:A0A3Q1MUA3|A0A3Q1MUA3_BOVIN:A0A3Q1LXM2|A0A3Q1LXM2_BOVIN
GPAGPPGPPGPPG	19.65	1053.5243	13	-0.9	527.7653	19.84	sp|P02453|CO1A1_BOVIN:sp|P02465|CO1A2_BOVIN:Q08E14|Q08E14_BOVIN
HAHLQPPGAE	18.01	1055.5148	10	13.5	528.7682	53.79
RISLPLPNF	18.2	1055.6127	9	1.7	528.8109	81.51
RGDDGEVGPR	27.71	1056.4948	10	0.5	529.2513	7.73	G3MZI7|G3MZI7_BOVIN
VGISGDVGLPGS	15.66	1056.5452	12	13.7	529.2835	30.09	A0A3Q1M1R0|A0A3Q1M1R0_BOVIN:A0A3Q1M906|A0A3Q1M906_BOVIN:F1MJY9|F1MJY9_BOVIN:A0A3Q1NK51|A0A3Q1NK51_BOVIN
LPGPIGPPGPR	33.99	1056.6079	11	-2.1	529.3065	50.4	sp|P02453|CO1A1_BOVIN
IPGPIGPPGPR	33.99	1056.6079	11	-2.1	529.3065	50.4
MPDIDLNLK	34.85	1057.5477	9	1	529.7781	60.4	A0A3Q1MHT0|A0A3Q1MHT0_BOVIN:F1MCK2|F1MCK2_BOVIN:A0A3Q1NE82|A0A3Q1NE82_BOVIN
KDLEEDHAC	17.9	1058.4338	9	-4.3	530.2183	22.44
ASPAFGANQTP	15.32	1059.4985	11	-0.6	530.7526	14.91
GISGPPGPPGPAG	27.36	1059.5349	13	-0.6	530.7708	33.21	sp|P02465|CO1A2_BOVIN
GIPGPPGAPGSPG	38.04	1059.5349	13	0.4	530.7713	34.26	F1N474|F1N474_BOVIN:A0A3Q1M0M2|A0A3Q1M0M2_BOVIN:A0A3Q1M970|A0A3Q1M970_BOVIN
DFADIPNLR	18.95	1059.5349	9	2.9	530.7726	67.3	sp|P19879|MIME_BOVIN:A5D9E8|A5D9E8_BOVIN:Q3T085|Q3T085_BOVIN
QTPAPPQPPQ	19.08	1059.5349	10	5.9	530.7742	76.93
QLWCLGRW	16.21	1060.5276	8	-8.8	531.2628	20.26
GQPGLHGLPGE	25.92	1060.5302	11	-3.2	531.267	24.61	F1N474|F1N474_BOVIN:A0A3Q1M0M2|A0A3Q1M0M2_BOVIN:A0A3Q1M970|A0A3Q1M970_BOVIN
GPAGPPGERGAP	22.85	1061.5254	12	-0.1	531.7663	8.68
GPAGLPGKDGPP	17.2	1061.5505	12	11.3	531.7849	19.03	G3MZI7|G3MZI7_BOVIN
GPSGPVGPPGLAG	18.33	1061.5505	13	11.3	531.7849	17.08	F1N2Y2|F1N2Y2_BOVIN
PGAPGTAGLPGAP	18.91	1061.5505	13	12.7	531.7856	15.08
GPQRPVPSGPA	30.93	1061.5618	11	0.5	531.7848	13.07	F1MBI8|F1MBI8_BOVIN
PGVGVPGVGVPGA	26.64	1061.5869	13	1	531.7976	48.44	sp|P04985|ELN_BOVIN
VGGPGIPGAPGAI	26.36	1061.5869	13	11.4	531.8032	27.2	sp|P04985|ELN_BOVIN
GEPGPGPLPRS	18.14	1062.5458	11	-9.4	532.2715	70.33
GPAGRAGRPGPA	18.07	1062.5682	12	-2.8	532.2863	15.16
PGPQGSTGPPGI	17.75	1063.5298	12	4.3	532.7708	66.87	F1N2Y2|F1N2Y2_BOVIN:A0A3Q1LSX2|A0A3Q1LSX2_BOVIN:A0A3Q1LL95|A0A3Q1LL95_BOVIN:A0A3Q1MDT9|A0A3Q1MDT9_BOVIN
GPTGPQGLPGPS	17.39	1063.5298	12	11.1	532.7744	10.98	A0A3Q1M1R0|A0A3Q1M1R0_BOVIN:A0A3Q1M906|A0A3Q1M906_BOVIN:F1MJY9|F1MJY9_BOVIN:A0A3Q1NK51|A0A3Q1NK51_BOVIN
GEAGFFGIPGL	19.46	1063.5338	11	5.7	532.7736	64.96	F1N7Q7|F1N7Q7_BOVIN:A0A3Q1LZF7|A0A3Q1LZF7_BOVIN:A0A3Q1MPS8|A0A3Q1MPS8_BOVIN:A0A3Q1LT89|A0A3Q1LT89_BOVIN:A0A3Q1LLV2|A0A3Q1LLV2_BOVIN:A0A3Q1NK70|A0A3Q1NK70_BOVIN
ERGVQGPPGPA	36.83	1063.541	11	1.2	532.7748	13.39	sp|P02453|CO1A1_BOVIN
KDGPPGRPGSP	15.06	1063.541	11	6.2	532.7775	74.24
PGALEGHTQR	15.62	1064.5363	10	3.6	533.2737	16.23
GLPGLRGLPGE	15.92	1064.5978	11	1.9	533.3035	54.58
VIQPLPIQAS	39.34	1064.6229	10	-5.7	533.3121	61.86	G3MZI7|G3MZI7_BOVIN
KAHDGGRYY	37.65	1065.4991	9	-0.9	533.7527	3.99	sp|P02453|CO1A1_BOVIN
SGGDYWRIL	38.69	1065.5243	9	0.3	533.7659	75.17	F1N1C7|F1N1C7_BOVIN:O97567|O97567_BOVIN
ADLGQLAPGGPA	17.76	1065.5454	12	-2.6	533.775	17.81
RVGLPVLSPE	18.06	1065.6182	10	2.3	533.814	43.52
PGQGQEQPGGI	19.76	1066.5043	11	3.5	534.2576	68.06
PGAMLGPSPGPS	20.55	1066.5117	12	1.4	534.2603	47.51
GPPGERGPPGF	24.26	1066.5195	11	8.1	534.2677	75.13	F1N7Q7|F1N7Q7_BOVIN:A0A3Q1LZF7|A0A3Q1LZF7_BOVIN:A0A3Q1MPS8|A0A3Q1MPS8_BOVIN:A0A3Q1LT89|A0A3Q1LT89_BOVIN:A0A3Q1LLV2|A0A3Q1LLV2_BOVIN:A0A3Q1NK70|A0A3Q1NK70_BOVIN
PPQKSPPGFI	22.25	1066.5811	10	-0.4	534.2939	80.52
SVPGALVSPGLA	15.05	1066.6022	12	1.6	534.3055	82.84
PGAGAAGSQGPAGA	20.45	1067.4995	14	4.1	534.7556	36.24	Q6UNK6|Q6UNK6_BOVIN:A0A3Q1M5Q0|A0A3Q1M5Q0_BOVIN:A2VE49|A2VE49_BOVIN:A6QL89|A6QL89_BOVIN:A0A3Q1NFN4|A0A3Q1NFN4_BOVIN
LPPPLPPGPPS	35.25	1067.6014	11	-0.6	534.804	64.62	A6QQQ3|A6QQQ3_BOVIN:sp|Q9GKN8|PRELP_BOVIN
GPGPMGLMGPR	17.99	1068.5209	11	-9.1	535.2592	7.54	sp|P02465|CO1A2_BOVIN
PGPYGPSGLPGA	17.75	1068.5239	12	1.6	535.2664	15.27	A0A3Q1M1R0|A0A3Q1M1R0_BOVIN:A0A3Q1M906|A0A3Q1M906_BOVIN:F1MJY9|F1MJY9_BOVIN:A0A3Q1NK51|A0A3Q1NK51_BOVIN
GPSPVPSATEK	15.05	1068.545	11	10.6	535.2818	24.19
MGPRGLPGER	17.34	1068.5498	10	2.5	535.2798	12.79	sp|P02453|CO1A1_BOVIN
SPGPLGPYGPK	17.85	1068.5603	11	1.7	535.2847	72.11	A0A3Q1M1R0|A0A3Q1M1R0_BOVIN:A0A3Q1M906|A0A3Q1M906_BOVIN:F1MJY9|F1MJY9_BOVIN:A0A3Q1NK51|A0A3Q1NK51_BOVIN
YALPQRPPQ	19.52	1068.5715	9	3.5	535.2913	39.06
GIPGEKGEIGL	23.22	1068.5814	11	2.2	535.2955	40.41
QPFMPIGPPS	15.13	1069.5266	10	-6.9	535.7632	59.9
KGDINIEGPK	19.03	1069.5768	10	13.1	535.799	0.15	A0A3Q1MHT0|A0A3Q1MHT0_BOVIN:F1MCK2|F1MCK2_BOVIN:A0A3Q1NE82|A0A3Q1NE82_BOVIN
PGPEGPPGPPGL	17.29	1070.5396	12	-9.6	536.2682	60.28
GPPGEPGLPGPP	15.38	1070.5396	12	7.6	536.2775	28.93	A0A3Q1M1R0|A0A3Q1M1R0_BOVIN:A0A3Q1M906|A0A3Q1M906_BOVIN:F1MJY9|F1MJY9_BOVIN:A0A3Q1NK51|A0A3Q1NK51_BOVIN
GFPGADGVAGPK	40.07	1071.5349	12	3.1	536.7727	27.09	sp|P02453|CO1A1_BOVIN
GPRGPPGPPGSP	15.02	1071.5461	12	5.6	536.7797	84.72
MVSGPGPAGPGF	18	1072.5011	12	8.8	537.2589	65.73
GPAGPPGFSRM	27.97	1072.5123	11	-13.9	537.2523	61.65	F1MJR6|F1MJR6_BOVIN
KSGDRGETGPA	20.72	1073.5101	11	-0.1	537.7586	0.67	sp|P02453|CO1A1_BOVIN:Q08E14|Q08E14_BOVIN
GLPGPAGPPGEAG	15.96	1075.5298	13	-0.1	538.7684	27.19	sp|P02453|CO1A1_BOVIN
EQGPPGIPGPQ	15.4	1075.5298	11	0.1	538.7686	26.83	sp|C0HLN2|CO9A2_BOVIN
PSTQQPPPPQ	22.94	1075.5298	10	4	538.7706	81.86
GPAGSRGPPGPQ	23.96	1076.5363	12	1.4	539.2725	9.69	Q08E14|Q08E14_BOVIN
ITPDHLEPR	32.96	1076.5614	9	-0.4	539.2841	16.18	E1BI98|E1BI98_BOVIN
GPPGPAGFPGAPG	16.85	1077.5243	13	13.3	539.7729	45.25	Q08E14|Q08E14_BOVIN
GPIGSRGPSGPP	15.61	1077.5566	12	-1.9	539.7809	15.88	sp|P02465|CO1A2_BOVIN
PGPAGPIGLKGD	17.24	1077.5818	12	11.9	539.8009	25.02
GPAGPDPEPGW	18.52	1078.4719	11	10.7	540.2453	16.88
GPSGPPGPDGNK	47.6	1078.5043	12	-0.2	540.2556	9.58	sp|P02465|CO1A2_BOVIN
GPSAVAGGAPAPQ	21.81	1078.5406	13	4.6	540.2764	6.63
GFPGPPGLPGSP	33.82	1078.5447	12	1.6	540.2768	73.17	F1N7Q7|F1N7Q7_BOVIN:A0A3Q1LZF7|A0A3Q1LZF7_BOVIN:A0A3Q1MPS8|A0A3Q1MPS8_BOVIN:A0A3Q1LT89|A0A3Q1LT89_BOVIN:A0A3Q1LLV2|A0A3Q1LLV2_BOVIN:A0A3Q1NK70|A0A3Q1NK70_BOVIN
PGLPGPMGIPGS	23.26	1078.5481	12	4.1	540.2798	50.95
GAVGPRGPSGPQ	15.53	1078.5519	12	0.4	540.2797	10.53	sp|P02465|CO1A2_BOVIN
GPSGPPGPKGDD	17.56	1079.4883	12	7.5	540.7518	8.95
GPAGPPGFPGAVG	26.49	1079.5399	13	0.5	540.7738	52.25	sp|P02453|CO1A1_BOVIN
PAGPRGSPGER	15.81	1079.5471	11	9.3	540.7822	23.73	sp|P02465|CO1A2_BOVIN
GPTGPRGERGP	24	1079.5471	11	10.8	540.783	12.98	G3MZI7|G3MZI7_BOVIN
PGDSPAVAAAPE	17.03	1080.5087	12	9.5	541.2631	14.97
AAAAAGGLAAAGGPG	15.95	1081.5515	15	-0.4	541.7791	12.65
GAPGMQGSPGPAG	20.33	1082.4814	13	14	542.2519	6.67
PPPPPQPPQE	26.96	1082.5396	10	-1.1	542.2728	50.62
FPGDRGLPGPA	23.88	1082.5508	11	0.3	542.2791	39.21
GERGFPGLPGP	28.76	1082.5508	11	0.5	542.2792	48.11	sp|P02453|CO1A1_BOVIN
QKGDPGLSPGK	15.58	1082.572	11	1.6	542.2905	8.75	F1MTP1|F1MTP1_BOVIN:A0A3Q1M646|A0A3Q1M646_BOVIN
STLLRDHEI	17.54	1082.572	9	2.6	542.291	35.96
FLPQPPQEK	34.54	1082.576	9	1.2	542.2922	26.45	sp|P02453|CO1A1_BOVIN
SPPAETHVFT	15.8	1084.5189	10	10.4	543.2687	44.75
GLPDLVPDPY	22.41	1084.5441	10	3.4	543.2775	81.99
GPAGAFPGALDGG	15.38	1085.5142	13	11	543.7666	15.08
GPSGAPYPFPP	15.23	1085.5182	11	8.2	543.7671	16.96
PGSGFPRGPASG	15.87	1085.5254	12	0.6	543.7666	15.08
GPAGPRGHPGPS	17.43	1085.5366	12	13.5	543.7792	31.91
IIAPPERKY	26.02	1085.6233	9	0.3	543.8154	14.87
SVPGGFDKPPS	18.14	1086.5345	11	3.4	544.2727	61.21
KDLFDPIIQ	23.05	1087.5913	9	1.3	544.7999	70.96
PQPGFPGADGF	17.83	1088.4927	11	-1.4	545.2491	53.2
PPGGYGAPPGGY	21.28	1088.4927	12	1.1	545.2505	47.77
AIGIGDMFHE	32.49	1088.4961	10	-1.5	545.2508	65.7	Q1JQB0|Q1JQB0_BOVIN:F1MKG2|F1MKG2_BOVIN
GPAATLSRTCL	19.29	1088.5648	11	-3.1	545.2843	54.79
NPGLPGEPGPVG	20.04	1089.5454	12	-12.1	545.7697	23.52	F1N474|F1N474_BOVIN:A0A3Q1M0M2|A0A3Q1M0M2_BOVIN:A0A3Q1M970|A0A3Q1M970_BOVIN
AGPTGPPGVPGSP	17.43	1089.5454	13	12.1	545.7828	12.31	F1MJR6|F1MJR6_BOVIN:Q7M2X0|Q7M2X0_BOVIN
PGVGVPGVGVPGV	23.74	1089.6182	13	-0.8	545.8122	29.88	sp|P04985|ELN_BOVIN
PGVGVAPGIGLGP	16.72	1089.6182	13	-0.6	545.8123	30.08	sp|P04985|ELN_BOVIN
GPQGPPGSIGPQ	26.03	1090.5406	12	0.8	546.2743	9.09	W0SK50|W0SK50_BOVIN
GPPGKTGPVGPQ	25.78	1090.577	12	8.9	546.2969	16.8	F1N0K0|F1N0K0_BOVIN
LPGIDGRPGPI	31.87	1090.6134	11	-0.9	546.3098	50.68	sp|P02465|CO1A2_BOVIN
GEKGEPGPPGPA	20.73	1091.5247	12	-0.2	546.7657	23.28
MPDLDFNLK	21.07	1091.5321	9	0.2	546.7697	65.21	A0A3Q1MHT0|A0A3Q1MHT0_BOVIN:F1MCK2|F1MCK2_BOVIN:A0A3Q1NE82|A0A3Q1NE82_BOVIN
GPAGGERAAAVH	19.29	1091.5471	12	-8.3	546.7726	8.65
ADLGPGAAGPVPA	15.25	1091.561	13	9.8	546.7894	15.64
GLEGLPGPQGAP	17.78	1091.561	12	10.1	546.7896	17.27	sp|Q7SIB2|CO4A1_BOVIN
GERGVPGPPGAV	41.19	1091.5723	12	-1.3	546.7889	22.69	sp|P02453|CO1A1_BOVIN
GAPGLLGPKGEP	15.46	1091.5974	12	0.8	546.8027	28.18
GPPGIPGAKGEL	21.21	1091.5974	12	1.6	546.8031	30.54
GDRGGPGPAGPR	15.19	1092.5424	12	5.5	547.2777	3.9	Q08E14|Q08E14_BOVIN
AGAPGTPGPQGIA	19.3	1092.5563	13	11	547.2877	6.98	sp|P02453|CO1A1_BOVIN
GEVIQPLPIQ	31.96	1092.6179	10	1.5	547.3133	70.48	G3MZI7|G3MZI7_BOVIN:sp|Q32S24|COBA2_BOVIN
TGPGERGPPGAV	28.6	1093.5515	12	12.4	547.7861	19.85	A0A3Q1MBH5|A0A3Q1MBH5_BOVIN:A0A3Q1MIV7|A0A3Q1MIV7_BOVIN:A0A3Q1LN20|A0A3Q1LN20_BOVIN:A0A3Q1MCD1|A0A3Q1MCD1_BOVIN:E1BFN9|E1BFN9_BOVIN:A0A3Q1M376|A0A3Q1M376_BOVIN
GPAGFPGPPGIQ	18.28	1093.5555	12	-0.1	547.7812	64.42	sp|Q32S24|COBA2_BOVIN
GPAGPPGFQGLP	19.57	1093.5555	12	0.2	547.7814	61.95	sp|P02465|CO1A2_BOVIN
GPPGLQGVQGGK	17.08	1093.588	12	-2.6	547.7961	27.87	sp|P02465|CO1A2_BOVIN
RPTSPGRAGPV	16.45	1093.5992	11	-8.6	547.7985	35.53
GPAAYDGSPGGF	30.5	1094.4668	12	11.7	548.2433	66.8	F1N1M2|F1N1M2_BOVIN
GPAGARGMPGPQ	15.01	1094.5291	12	10.7	548.2739	9.52
PQGPPGEIGFP	18.87	1094.5396	11	-2.6	548.2719	52.84	sp|Q7SIB2|CO4A1_BOVIN
GPAPAPGDFAPV	16.05	1094.5396	12	9.6	548.2786	43.03
PRGDSGQPGPK	25.45	1094.5469	11	-0.3	548.2768	7.18	Q1JQB0|Q1JQB0_BOVIN:F1MKG2|F1MKG2_BOVIN
GPAGPKGDPGSR	16.29	1094.5469	12	11.6	548.2833	20.94
GPRGDQGPVGR	42.79	1094.5581	11	-0.4	548.2823	7.34	sp|P02465|CO1A2_BOVIN
GLPGRDGAPGAK	32.6	1094.5833	12	2.2	548.2964	10.32	Q08E14|Q08E14_BOVIN
EFGFDGDFY	37.47	1095.4185	9	0.9	548.7133	84.74	sp|P02465|CO1A2_BOVIN
KPGGGAAEGAGPGA	21.66	1095.5308	14	1.6	548.7698	5.18
TGGAQNPAGPGGI	15.81	1095.5309	13	3.4	548.7708	58.04
VGVGLPLAEEL	15.07	1095.6176	11	11.6	548.8187	40.75
PGAGEREATPL	16.11	1096.5513	11	5.1	549.282	66.13
GADGAPGKDGVR	39.91	1098.5417	12	-0.3	550.2742	7.52	sp|P02453|CO1A1_BOVIN
GPFGDRLGPSP	15.33	1098.5458	11	-9.9	550.271	48.39
PPQPLPPPQE	17.26	1098.5709	10	5.6	550.2921	29.94
KGEKGDQGPQG	16.93	1099.5258	11	5.9	550.7697	0.62	F1MUC5|F1MUC5_BOVIN:A0A3Q1M4P8|A0A3Q1M4P8_BOVIN:A0A3Q1M0N0|A0A3Q1M0N0_BOVIN:A0A3Q1MUA3|A0A3Q1MUA3_BOVIN:A0A3Q1LXM2|A0A3Q1LXM2_BOVIN
GPSGLSIQGMPG	15.02	1099.5332	12	-3.1	550.7684	16.21
ADRLGNNQGR	22.12	1099.5482	10	-9.2	550.7726	8.87
PGIPGPPGAPGSP	18.54	1099.5662	13	-1.1	550.786	39.51	F1N474|F1N474_BOVIN:A0A3Q1M0M2|A0A3Q1M0M2_BOVIN:A0A3Q1M970|A0A3Q1M970_BOVIN
VPMVPPGIKY	23.62	1099.61	10	0.4	550.8087	50.07	sp|Q05443|LUM_BOVIN
SPSFQPSSPAP	25.31	1100.5138	11	10.9	551.2664	44.86
QPPDIEYQI	23.46	1101.5342	9	10.5	551.7764	30.67
SGPIGPGGPPGLP	26.32	1101.5818	13	11.6	551.8008	21.94	sp|Q32S24|COBA2_BOVIN
GAPPQQDYTK	16.12	1103.5247	10	11.8	552.7723	9.15
RQGPPAGPAAPS	17.02	1104.5675	12	0.1	553.2873	11.73
PGLGVGAGVPGPGA	15.86	1104.5927	14	-7.8	553.2955	50.45	sp|P04985|ELN_BOVIN
KLPVLPPKLT	30.3	1104.7271	10	0.7	553.3674	40.38	sp|P19879|MIME_BOVIN:A5D9E8|A5D9E8_BOVIN:Q3T085|Q3T085_BOVIN
GIDGRPGPIGPA	39.63	1105.5879	12	0.5	553.7977	28.89	sp|P02465|CO1A2_BOVIN
IDGRPGPIGPAG	24.07	1105.5879	12	1	553.798	50.82	sp|P02465|CO1A2_BOVIN
CLCAPGYAGPR	16.64	1106.5001	11	9.8	554.259	43.4
RGPSGPPGPDGN	19.99	1106.5105	12	-4.4	554.2563	10.23	sp|P02465|CO1A2_BOVIN
GPDGKTGPPGPAG	18.73	1106.5356	13	10.5	554.2771	8.41	sp|P02453|CO1A1_BOVIN
SGPAGPRGPPGSA	40.33	1106.5469	13	-0.5	554.2767	10.67	sp|P02453|CO1A1_BOVIN
VAGGTAPAAAPGPA	17.98	1106.572	14	-12.4	554.2827	56.91
GPSGIPGLQGPAG	18.51	1106.572	13	8.9	554.2944	14.49	F1MJR6|F1MJR6_BOVIN:Q7M2X0|Q7M2X0_BOVIN
GPAAATRAQPPA	16.81	1106.5833	12	6.9	554.299	28.89
PKGDRGPAGVPG	16.2	1106.5833	12	10	554.3007	27.81	F1MJR6|F1MJR6_BOVIN
GPTGFPGPKGPP	16.11	1107.5713	12	-4.4	554.7867	14.05	G3MZI7|G3MZI7_BOVIN
GPAGEPGREGSP	16.74	1109.5101	12	-0.8	555.7581	39.12
GPSGPSGLPGER	40.3	1109.5465	12	-1	555.7762	17	sp|P02465|CO1A2_BOVIN
PGAKMPSTPQP	15.25	1109.554	11	10.1	555.7861	45.91
PGSRARLPQE	19.34	1109.5941	10	-5.7	555.7974	32.94
PGAGPSPASFPQ	17.17	1111.5298	12	9.3	556.7736	18.06
QDGLQPTAVSP	15.44	1111.5509	11	2	556.78	39.25
GILGIPRSNGE	17.28	1111.5985	11	4	556.8049	49.54
FTGLPQQWH	16	1112.5403	9	12.9	557.2808	58.35
PRDDDLNLR	37.48	1112.5574	9	-1.9	557.2811	15.8	Q1JQB0|Q1JQB0_BOVIN:F1MKG2|F1MKG2_BOVIN
ERGFPGLPGPS	34.83	1112.5614	11	0.7	557.2845	47.03	sp|P02453|CO1A1_BOVIN
QPGVMGFPGPK	24.07	1113.5641	11	-8.6	557.7807	11.62	Q08E14|Q08E14_BOVIN
GLPGPIGPPGPR	38.24	1113.6294	12	0.6	557.8185	38.42	sp|P02453|CO1A1_BOVIN
GIPGPIGPPGPR	38.24	1113.6294	12	0.6	557.8185	38.42
PGAPGPPGSPGPAG	25.4	1114.5406	14	-0.2	558.2737	40.89
ERGGFNKPGGP	20.12	1114.5519	11	-9.5	558.2741	34.96
APGAPGAPGPVGPA	40.95	1114.577	14	2.5	558.2934	30.52	sp|P02453|CO1A1_BOVIN
GRPGPPGPPGAR	23.63	1114.5995	12	-1.1	558.3026	10.15	sp|P02453|CO1A1_BOVIN
AGSPGLPGPPGLP	21.39	1115.5974	13	-0.3	558.802	45.31
PGAPGPMGPPGSP	18.38	1117.5226	13	-6.5	559.7611	50.19	F1N474|F1N474_BOVIN:A0A3Q1M0M2|A0A3Q1M0M2_BOVIN:A0A3Q1M970|A0A3Q1M970_BOVIN
SLFHDPPGSY	21	1118.5032	10	1	560.2556	46.6
GPAGPPGERGAPG	17.58	1118.5468	13	7.5	560.281	37.47
GPPGKDGLPGPQ	17.93	1118.572	12	9.8	560.2949	16.36
VGPAGPRGPAGPS	20.21	1118.5833	13	1.4	560.2958	13.58	sp|P02465|CO1A2_BOVIN
GAPGLPGLPGRE	17.69	1119.6036	12	4.4	560.8077	35.93
GPIGIQGPTGPQ	18.07	1120.5876	12	1.5	561.2981	11.97	A0A3Q1M1R0|A0A3Q1M1R0_BOVIN:A0A3Q1M906|A0A3Q1M906_BOVIN:F1MJY9|F1MJY9_BOVIN:A0A3Q1NK51|A0A3Q1NK51_BOVIN
GPRGEKGPVGAP	16.49	1120.5989	12	-9.4	561.2976	21.98
VGPAGAVGPRGPS	15.33	1120.5989	13	2.5	561.3043	13.58	sp|P02465|CO1A2_BOVIN
AGPPGADGQPGAK	47.63	1121.5465	13	0.1	561.7767	10.38	sp|P02453|CO1A1_BOVIN
YGQGPPPPGGVP	17.49	1121.5505	12	0.8	561.7792	51.32	A0A3Q1N2S6|A0A3Q1N2S6_BOVIN:A5D7S6|A5D7S6_BOVIN
FGFDGDFYR	41.96	1122.4771	9	-0.3	562.2418	61.34	sp|P02465|CO1A2_BOVIN
GIAGPRGGPGER	16.65	1122.5894	12	10.9	562.3043	27.88	Q08E14|Q08E14_BOVIN
GERGTPGPGGAIG	16.07	1124.5574	13	-0.1	563.282	6.97
SLREPPAGEGI	17.83	1124.5825	11	4.9	563.2974	64.79
AAINANGLIATP	15.17	1124.6189	12	8.4	563.3176	43.3
GPYGPSGLPGAPG	29.2	1125.5454	13	-3.9	563.7739	16.26	A0A3Q1M1R0|A0A3Q1M1R0_BOVIN:A0A3Q1M906|A0A3Q1M906_BOVIN:F1MJY9|F1MJY9_BOVIN:A0A3Q1NK51|A0A3Q1NK51_BOVIN
CLTGPPGASGLPG	22.92	1125.5488	13	-3.1	563.7761	19.24
GPAGERGAGGGGAL	15.72	1125.5526	14	-4.8	563.777	43.81
GLAGPGGAHYRA	16.54	1125.5679	12	13.2	563.7948	28.08
KDGIQVDHES	15.91	1126.5254	10	10.6	564.2721	4.3
IGADGQETIQP	15.61	1127.5459	11	2.5	564.7778	14.81	F1N7Q7|F1N7Q7_BOVIN:A0A3Q1LZF7|A0A3Q1LZF7_BOVIN:A0A3Q1MPS8|A0A3Q1MPS8_BOVIN:A0A3Q1LLV2|A0A3Q1LLV2_BOVIN:A0A3Q1NK70|A0A3Q1NK70_BOVIN
KGDQGEKGPRG	15.27	1127.5682	11	4.4	564.79	7.06	W0SK50|W0SK50_BOVIN
QVRAQPGEIM	15.93	1127.5757	10	-0.7	564.7909	29.4
GLPGPIGFLGNS	28.94	1127.5974	12	11.5	564.8086	31.23	A0A3Q1M1R0|A0A3Q1M1R0_BOVIN:A0A3Q1M906|A0A3Q1M906_BOVIN:F1MJY9|F1MJY9_BOVIN:A0A3Q1NK51|A0A3Q1NK51_BOVIN
FDGLPGLPGEK	21.01	1128.5814	11	1	565.2947	63.53	sp|Q32S24|COBA2_BOVIN
AATPPQPIAAPP	15.6	1129.6132	12	12.4	565.817	69.38
GLPGLGKACLTT	16.82	1129.6165	12	8	565.8162	49.13
GKSGDRGETGPA	45.3	1130.5316	12	-1.8	566.2682	1.21	sp|P02453|CO1A1_BOVIN:Q08E14|Q08E14_BOVIN
GPSVPQPAPGQP	24.66	1130.572	12	7.7	566.2938	34.56
GRPGPPGSPGPR	20.86	1130.5945	12	0.2	566.3008	8.31	Q08E14|Q08E14_BOVIN
PGVGVGGPGIPGAP	34.25	1130.6084	14	9.2	566.3128	21.71	sp|P04985|ELN_BOVIN
RGVPGPPGAVGPA	44.8	1130.6196	13	1.1	566.3138	23.82	sp|P02453|CO1A1_BOVIN
GPPGLPGSPGQIG	15.57	1132.5876	13	13.5	567.3049	19.69	A0A3Q1LT89|A0A3Q1LT89_BOVIN
GPVGLPGIDGRP	17.16	1133.6193	12	0.9	567.8135	37.59	sp|P02465|CO1A2_BOVIN
GPKGDIGPAGLPG	16.7	1134.6033	13	-1.9	568.304	1.87
PQYPGRGPPPA	17.31	1135.5774	11	10.4	568.798	39.07
GPPGLPGLRGDT	20.72	1135.5985	12	1.2	568.8033	32.62	sp|Q32S24|COBA2_BOVIN
GPAGPLGPPGFLG	24.61	1135.6025	13	-4.7	568.802	28.11	F1MZU6|F1MZU6_BOVIN
PGIPGVIGLKGE	16.86	1135.66	12	7	568.8374	56.86	F1MZU6|F1MZU6_BOVIN
GPAGPRGSPGER	23.69	1136.5686	12	4.9	569.2905	25.39	sp|P02465|CO1A2_BOVIN
QPPQQTSQPQ	19.16	1137.5414	10	0.3	569.7742	9.88
SVPGPMGPSGPR	22.01	1137.5601	12	0.8	569.7839	20.41	sp|P02453|CO1A1_BOVIN
GFPGLRGPSGPP	19.39	1137.593	12	-0.5	569.7996	43.54	F1MTP1|F1MTP1_BOVIN:A0A3Q1M646|A0A3Q1M646_BOVIN:A0A3Q1MT85|A0A3Q1MT85_BOVIN
GHPGPIGPPGPR	28	1137.6042	12	2.3	569.8068	12.94	Q08E14|Q08E14_BOVIN
PGSVSTRGPGGAP	16.29	1138.573	13	-1.3	570.2891	11.8
AQSPFGPVPGSP	15.11	1139.561	12	2.9	570.7855	45.56
GPAGPPGPPGPPGS	21.35	1140.5563	14	1	571.2821	15.7
PGPQGPPGPPGPS	19.41	1140.5563	13	10.8	571.2877	65.78
DLSFLPQPPQ	43.9	1140.5815	10	0.9	571.2947	79.67	sp|P02453|CO1A1_BOVIN
AGEAGKPGERGI	17.39	1140.5886	12	4.9	571.3005	12.84	sp|P02465|CO1A2_BOVIN
IGPPGPPGLPGPS	40.21	1141.613	13	2.2	571.8112	57.09	F1N474|F1N474_BOVIN:A0A3Q1M0M2|A0A3Q1M0M2_BOVIN:A0A3Q1M970|A0A3Q1M970_BOVIN
SRISLPLPNF	17.62	1142.6448	10	5.3	572.3288	80.79
LDCPNPEIPF	28.14	1143.527	10	-1.6	572.7659	84.13	Q08E14|Q08E14_BOVIN
RESNSTIPGPS	15.14	1143.552	11	3.3	572.7812	35.76
PGRPPGVGSPGAP	22.52	1144.5989	13	-1	573.3022	18.84
LGPPGLPGLGDPG	19.42	1145.608	13	9.7	573.8129	27.09
VGSPGPAGPRGPV	17.24	1146.6145	13	6.5	574.3143	20.92	Q08E14|Q08E14_BOVIN
GVPGVGVPGVGVPG	36.72	1146.6396	14	2.6	574.3246	71.47	sp|P04985|ELN_BOVIN
GPPGPAPHGPPAP	15.25	1147.5774	13	5.6	574.7953	53.8
GLPGIDGRPGPI	42.2	1147.6349	12	0.1	574.8209	61.58	sp|P02465|CO1A2_BOVIN
LGQGAEPGPGPGL	15.09	1148.5825	13	10.5	575.3007	22.73
VSPQQPGPSGPV	30.85	1148.5825	12	11.2	575.301	15.38	E1BN01|E1BN01_BOVIN
GRPGATGLPGPIG	27.44	1148.6301	13	-6.5	575.3147	25.02
GPAGPPGFPGAVGA	33.3	1150.577	14	1.1	576.2925	59.61	sp|P02453|CO1A1_BOVIN
GPPGLPGPKGFAG	16.92	1150.6134	13	-2.2	576.3088	62.63	F1N7Q7|F1N7Q7_BOVIN:A0A3Q1LZF7|A0A3Q1LZF7_BOVIN:A0A3Q1MPS8|A0A3Q1MPS8_BOVIN:A0A3Q1LT89|A0A3Q1LT89_BOVIN:A0A3Q1LLV2|A0A3Q1LLV2_BOVIN:A0A3Q1NK70|A0A3Q1NK70_BOVIN
KREDPKPGPK	15.74	1150.6458	10	2	576.3274	12.35
PGSPGFPGVPGSP	25.39	1151.561	13	4.3	576.7863	60.73	F1N7Q7|F1N7Q7_BOVIN:A0A3Q1LZF7|A0A3Q1LZF7_BOVIN:A0A3Q1MPS8|A0A3Q1MPS8_BOVIN:A0A3Q1LT89|A0A3Q1LT89_BOVIN:A0A3Q1LLV2|A0A3Q1LLV2_BOVIN:A0A3Q1NK70|A0A3Q1NK70_BOVIN
DIDTPDIDIH	21.28	1152.5299	10	1.3	577.269	55.19	A0A3Q1MHT0|A0A3Q1MHT0_BOVIN:F1MCK2|F1MCK2_BOVIN:A0A3Q1NE82|A0A3Q1NE82_BOVIN
PGYPGSRGPPGI	17.38	1153.5879	12	-5.6	577.7941	65.5	E1BI98|E1BI98_BOVIN
GFPGLPGKDGLP	26.41	1153.613	12	14.1	577.818	56.96	A0A3Q1M1R0|A0A3Q1M1R0_BOVIN:A0A3Q1M906|A0A3Q1M906_BOVIN:F1MJY9|F1MJY9_BOVIN:A0A3Q1NK51|A0A3Q1NK51_BOVIN
LSFLPQPPQE	41.91	1154.5972	10	2.6	578.3034	73.37	sp|P02453|CO1A1_BOVIN
PEPFCLLPGPS	16.31	1155.5634	11	3.5	578.787	47.64
GFPGSRGDIGPP	20.22	1155.5673	12	0.2	578.787	34.61	sp|Q7SIB2|CO4A1_BOVIN
LEELAWPGIM	17.16	1157.5791	10	-3	579.7911	30.91
FDGLAGLPGEKG	18.18	1159.5873	12	0.2	580.7971	50.25	G3MZI7|G3MZI7_BOVIN
GEPGLPGDPGLPG	15.61	1161.5665	13	-12.7	581.7792	22.26
PGAGAAGSQGPAGAP	34.31	1164.5522	15	7.8	583.2839	41.28	Q6UNK6|Q6UNK6_BOVIN:A0A3Q1M5Q0|A0A3Q1M5Q0_BOVIN:A2VE49|A2VE49_BOVIN:A6QL89|A6QL89_BOVIN:A0A3Q1NFN4|A0A3Q1NFN4_BOVIN
RVGLERPLPE	15.75	1164.6615	10	4.4	583.3366	45.39
GPYGPPGAPGIGQ	31.18	1166.572	13	-0.5	584.289	18.68	E1BPV7|E1BPV7_BOVIN:A0A3Q1LYA4|A0A3Q1LYA4_BOVIN
PQGMLGPAQVAV	17.19	1166.6118	12	13.2	584.3169	34.1
GPAGREGPSWR	15.21	1168.5737	11	9.4	585.2957	20.12
GEPGNIGFPGPK	40.75	1168.5876	12	0.3	585.2973	33.96	sp|P02465|CO1A2_BOVIN
PGAVGGFPGLQGL	17.43	1168.624	13	-6.9	585.3113	20.42
GERGFPGLPGPS	37.84	1169.5829	12	2.4	585.7961	47.84	sp|P02453|CO1A1_BOVIN
SFLPQPPQEK	28.59	1169.608	10	0.8	585.8077	35.37	sp|P02453|CO1A1_BOVIN
GPMSLQANLGPS	19.8	1170.5703	12	6.1	586.292	31.8
SFTPDHKPLM	15.05	1171.5696	10	0.3	586.7882	35.75
IVQPIISKLY	27.02	1172.7168	10	0.5	587.3619	60.67
FSDFGPLAPQP	18.07	1174.5658	11	-0.1	588.2861	85.1
GVPGLGVGVGVPGL	16.28	1176.6866	14	2.6	589.3481	86.37
HGFPGAPGREGP	18.4	1177.5627	12	-10.3	589.7786	21.64	F1N7Q7|F1N7Q7_BOVIN:A0A3Q1LZF7|A0A3Q1LZF7_BOVIN:A0A3Q1MPS8|A0A3Q1MPS8_BOVIN:A0A3Q1LT89|A0A3Q1LT89_BOVIN:A0A3Q1LLV2|A0A3Q1LLV2_BOVIN:A0A3Q1NK70|A0A3Q1NK70_BOVIN
TGTPGLPGPPGPM	16.37	1177.5801	13	4.6	589.796	57.94
GPIGIQGPTGPQG	18.54	1177.6091	13	0.3	589.808	23.04	A0A3Q1M1R0|A0A3Q1M1R0_BOVIN:A0A3Q1M906|A0A3Q1M906_BOVIN:F1MJY9|F1MJY9_BOVIN:A0A3Q1NK51|A0A3Q1NK51_BOVIN
GLPGLPGQQGTPG	22.19	1177.6091	13	2.8	589.8094	32.04	sp|Q7SIB2|CO4A1_BOVIN
TGPIGSRGPSGPP	18.2	1178.6044	13	1.8	590.3065	15.14	sp|P02465|CO1A2_BOVIN
RPGPPGPPGPPGP	18.53	1178.6196	13	-9.8	590.3073	29.96	A0A3Q1M1R0|A0A3Q1M1R0_BOVIN:A0A3Q1M906|A0A3Q1M906_BOVIN:F1MJY9|F1MJY9_BOVIN:A0A3Q1NK51|A0A3Q1NK51_BOVIN
PPPPPPQPPQE	24.53	1179.5924	11	-1.2	590.7988	63.09
AGPSGPSGLPGER	16.87	1180.5836	13	-0.5	591.2947	18.42	sp|P02465|CO1A2_BOVIN
GPAGPIGSAGPPGF	20.9	1180.5876	14	8.6	591.3021	26.98	sp|P02465|CO1A2_BOVIN
FEGRGGPLPQE	15.35	1185.5778	11	-1.2	593.7914	58.96
TGPPGIGLPGAPGP	27.84	1186.6345	14	11.4	594.3273	30.67	A0A3Q1M1R0|A0A3Q1M1R0_BOVIN:A0A3Q1M906|A0A3Q1M906_BOVIN:F1MJY9|F1MJY9_BOVIN:A0A3Q1NK51|A0A3Q1NK51_BOVIN
SVPMVPPGIKY	21.94	1186.642	11	-1.7	594.3232	56.72	sp|Q05443|LUM_BOVIN
IAGSPGLPGPVGPA	16.2	1188.6503	14	-0.5	595.3281	62.83
RDGSRGSESSPG	15.69	1190.5276	12	-3.5	596.2649	14.2
VAIARALPAGPR	15.99	1190.7247	12	10.1	596.3716	4.12
GPGNGRAQGPGGAP	20.82	1191.5745	14	-11.2	596.7838	31.23
PGPKGEMGPVGPA	21.24	1192.5909	13	-0.8	597.2982	57.19
GPPGLPGLRGDTG	20.81	1192.62	13	3.4	597.3152	31.87	sp|Q32S24|COBA2_BOVIN
FGFDGDFYRA	41.35	1193.5142	10	0.2	597.7604	72.45	sp|P02465|CO1A2_BOVIN
GLWPRFPGPPA	17.22	1193.6345	11	5.4	597.8237	35.82
LGSPVDSVLFY	15.01	1195.6124	11	6.7	598.8134	50.25
GPAGPTRQASQAG	17.84	1196.5897	13	3.1	599.2999	21.67
GPPGAPGAPGAPGPV	38.87	1197.6141	15	0	599.8102	36.35	sp|P02453|CO1A1_BOVIN
SGPDGSVYVGDF	19.23	1198.5142	12	-4.6	600.2575	3.24
IGSPGPRGLPGPP	15.3	1200.6615	13	0.3	601.3341	39.02
AFGPGLQGGSAGSP	16.14	1201.5728	14	-0.5	601.7892	32.78
GPKGAQGLPGAPGP	20.74	1202.6407	14	0.7	602.324	26.33	F1MZU6|F1MZU6_BOVIN
PGIDGRPGPIGPA	41.95	1202.6407	13	1.9	602.3247	62.22	sp|P02465|CO1A2_BOVIN
PGTTVPAWPGPQ	18.9	1206.6033	12	0.5	604.3051	55.13
APGAPGHPGPPGPV	44.85	1206.6145	14	0.1	604.3105	20.85	Q08E14|Q08E14_BOVIN
GPPGHPSHPGPDG	20.11	1207.537	13	4.3	604.7742	11.15	F1N2Y2|F1N2Y2_BOVIN:A0A3Q1LSX2|A0A3Q1LSX2_BOVIN:A0A3Q1LL95|A0A3Q1LL95_BOVIN:A0A3Q1MDT9|A0A3Q1MDT9_BOVIN
GLRGPRGDQGPV	16.7	1207.6421	12	1.7	604.8252	12.24	sp|P02465|CO1A2_BOVIN
GPAGPPQRKTSD	16.29	1209.6101	12	14.3	605.8168	12.78
GPAPGPLYRVSP	15.36	1209.6505	12	-11	605.8217	69.41
GPAGPNGFAGPAGAA	20.66	1210.573	15	-0.6	606.2892	22.42	sp|P02465|CO1A2_BOVIN
GPSGRGRQGGPW	16.7	1210.5955	12	10	606.3069	29.36
GDLDGLPKSSPGA	16.94	1212.5986	13	9	607.3079	54.44
PGEGLPGPPGPPGS	20.8	1214.5931	14	10	608.3058	35.72	W0SK50|W0SK50_BOVIN
GPSGPRGLPGPPGA	18.35	1215.636	14	0.9	608.8217	21.67	sp|P02453|CO1A1_BOVIN
TSAAPPHPGPGSAA	19.47	1216.5836	14	0.2	609.295	25.34
SVPGIPGPSSPQP	27.07	1218.6244	13	13.7	610.3237	49.05
GPPGAPGSPGSSRP	20.76	1219.5945	14	3.1	610.8022	36.57	F1MZU6|F1MZU6_BOVIN
PGGYPGAPQPGGAP	21.72	1221.5778	14	-2.4	611.7905	39.35
VDIDVPDVDVH	23.4	1221.5876	11	-0.8	611.7964	60.76	A0A3Q1MHT0|A0A3Q1MHT0_BOVIN:F1MCK2|F1MCK2_BOVIN:A0A3Q1NE82|A0A3Q1NE82_BOVIN
SVGPLPKSLVDL	15.36	1223.7125	12	-0.5	612.8591	74.46	sp|Q05443|LUM_BOVIN
PGLPGPIGFLGNS	16.47	1224.6503	13	5.3	613.3315	50.5	A0A3Q1M1R0|A0A3Q1M1R0_BOVIN:A0A3Q1M906|A0A3Q1M906_BOVIN:F1MJY9|F1MJY9_BOVIN:A0A3Q1NK51|A0A3Q1NK51_BOVIN
HAAWRDGLDW	15.15	1225.5629	10	1.2	613.7853	49.6
DGNYLKPPIPL	41.2	1225.6707	11	2.8	613.8401	81.28	A6QQQ3|A6QQQ3_BOVIN:sp|Q9GKN8|PRELP_BOVIN
GEIKVPDVELK	20.3	1225.6918	11	1.4	613.8499	42.99	A0A3Q1MHT0|A0A3Q1MHT0_BOVIN:F1MCK2|F1MCK2_BOVIN:A0A3Q1NE82|A0A3Q1NE82_BOVIN
PGPGFYNVIHQ	16.87	1227.6036	11	7.7	614.8096	40.95
RGFPGADGVAGPK	18.38	1227.636	13	3	410.2177	21.86	sp|P02453|CO1A1_BOVIN
NGLPGPIGPPGPR	31.88	1227.6724	13	2.7	614.8409	38.89	sp|P02453|CO1A1_BOVIN
NGIPGPIGPPGPR	31.88	1227.6724	13	2.7	614.8409	38.89
ERPGPIFGLLM	16.42	1228.6638	11	-7	615.3307	55.44
DGRPGPPGPPGAR	16.98	1229.6265	13	-0.6	615.8159	12.8	sp|P02453|CO1A1_BOVIN
EGPPGKTGPIGPQ	40.11	1233.6353	13	-3.7	617.8184	18.69	G3MZI7|G3MZI7_BOVIN
GPTGPQGLPGPSGL	19.79	1233.6353	14	9.8	617.8267	19.01	A0A3Q1M1R0|A0A3Q1M1R0_BOVIN:A0A3Q1M906|A0A3Q1M906_BOVIN:F1MJY9|F1MJY9_BOVIN:A0A3Q1NK51|A0A3Q1NK51_BOVIN
RGPSGPPGPDGNK	33.99	1234.6053	13	2.6	618.3073	7.73	sp|P02465|CO1A2_BOVIN
SLREPPAGEGIL	26.12	1237.6666	12	3	619.8382	80.04
GPTPGPPLIPVPV	19.78	1239.7227	13	5.4	620.8677	88.22
APISGPGIPGQFT	15.61	1240.6451	13	-7.3	621.3211	45.79
PGNPGLPGEPGPVG	15.12	1243.6196	14	0.9	622.8134	59.1	F1N474|F1N474_BOVIN:A0A3Q1M0M2|A0A3Q1M0M2_BOVIN:A0A3Q1M970|A0A3Q1M970_BOVIN
LPGPPGAEGLPGSP	26.1	1244.64	14	7.1	623.3275	62.44	sp|Q7SIB2|CO4A1_BOVIN
RDGLPGLPGLPGP	16.73	1244.6876	13	0.8	623.3474	32.15	A0A3Q1M1R0|A0A3Q1M1R0_BOVIN:A0A3Q1M906|A0A3Q1M906_BOVIN:F1MJY9|F1MJY9_BOVIN:A0A3Q1NK51|A0A3Q1NK51_BOVIN
GIAGSPGLPGPVGPA	18.39	1245.6716	15	9.1	623.8445	34.22
GVPGVGVPGVGVPGV	29.76	1245.7081	15	0.2	623.8572	81.38	sp|P04985|ELN_BOVIN
VGVPGVGVPGVGVPG	32.41	1245.7081	15	1.6	623.8581	78.29	sp|P04985|ELN_BOVIN
GERGAPGPQGPPGA	17.63	1246.6053	14	-3.3	624.3036	39.24	Q08E14|Q08E14_BOVIN
YGLPDLVPDPY	16.47	1247.6073	11	9.9	624.8128	86.35
LGPDKNFTQTQ	15.77	1247.6146	11	-7.3	624.8058	28.26
LAGPEDALARHV	16.23	1247.6622	12	0.8	624.8346	17.17
VSPASSPDPQAPV	16.3	1250.6143	13	8.2	626.3152	35.86
DKPERSPASPAP	19.92	1250.6255	12	-2.2	626.3144	50.87
RGNQGLDGIPGPA	21.69	1250.6367	13	-10.5	626.3148	17.07	F1MZU6|F1MZU6_BOVIN
RGPRGDQGPVGR	30.01	1250.6592	12	0.3	417.891	7.07	sp|P02465|CO1A2_BOVIN
EFGFDGDFYR	39.53	1251.5195	10	0.9	626.7633	77	sp|P02465|CO1A2_BOVIN
GPPGFQGLPGPAGT	25.89	1251.6248	14	9.4	626.8212	32.9	sp|P02465|CO1A2_BOVIN
YRDGAALGPPGPS	15.49	1256.6149	13	0.4	629.3107	56.65
PGPAGPQGAPGPAGE	20.85	1258.5941	15	3	630.3019	33.25
EVGPRGLPGEPGP	35.21	1260.6462	13	0	631.3261	39.05	G3MZI7|G3MZI7_BOVIN
SMPDPLPEFTE	28.76	1261.5536	11	0.3	631.78	78.71	F1N2Y2|F1N2Y2_BOVIN:A0A3Q1LSX2|A0A3Q1LSX2_BOVIN:A0A3Q1LL95|A0A3Q1LL95_BOVIN:A0A3Q1MDT9|A0A3Q1MDT9_BOVIN:A0A3Q1MUF0|A0A3Q1MUF0_BOVIN
GVGVPGVGVPGALSP	16.05	1261.703	15	5.9	631.8582	77.68	sp|P04985|ELN_BOVIN
RGEPGPPGPAGFAG	22.62	1265.6152	14	-7	633.8062	72.72	sp|P02453|CO1A1_BOVIN
GPYGPKGDKGHPG	15.71	1265.6152	13	0	633.8105	22.9	F1MJY9|F1MJY9_BOVIN
PGAVGGFPGLQGLP	17.62	1265.6768	14	-2.9	422.8954	15.03
GGGYEFGFDGDF	44.64	1266.4829	12	2.1	634.2457	80.72	sp|P02465|CO1A2_BOVIN
GPAGPNGFAGPAGAAG	18.96	1267.5945	16	2.4	634.8017	22.22	sp|P02465|CO1A2_BOVIN
FAGPPGADGQPGAK	39.58	1268.6149	14	-0.6	635.31	19.89	sp|P02453|CO1A1_BOVIN
VDIDVPDVDVQG	20.18	1269.6089	12	10.4	635.814	51.45	A0A3Q1MHT0|A0A3Q1MHT0_BOVIN:F1MCK2|F1MCK2_BOVIN:A0A3Q1NE82|A0A3Q1NE82_BOVIN
DLSFLPQPPQE	45.62	1269.624	11	1.4	635.8159	79.01	sp|P02453|CO1A1_BOVIN
DFDWEYPGSR	28.57	1270.5254	10	0.1	636.2657	59.96	F1MH27|F1MH27_BOVIN
SGGPIGPPGRPGPQ	23.24	1272.6575	14	2.4	637.3332	21.64	sp|Q32S24|COBA2_BOVIN
SPGPQGPPGSIGPQ	29.59	1274.6255	14	0.2	638.3158	10.49	W0SK50|W0SK50_BOVIN
PSTVPSPRDGPAP	18.72	1276.6411	13	2.6	639.3251	82.5
RGDIASQNMMR	16.32	1277.5969	11	10.9	639.8083	8.04
GPAGPIGSAGPPGFP	17.06	1277.6404	15	8.9	639.8288	35.29	sp|P02465|CO1A2_BOVIN
GPVGPSGPPGKDGAS	40.22	1278.6204	15	-1.1	640.3124	14.75	Q08E14|Q08E14_BOVIN
GPAGPPGFPGAVGAK	31.18	1278.672	15	-14.9	640.3294	37.14	sp|P02453|CO1A1_BOVIN
GAPGFPGNAGVPGSP	17.74	1280.6149	15	-4.2	641.3076	42.4
GERGLPGEKGER	15.34	1283.6582	12	-3.9	642.8295	12.81
NTLVCLAVWRN	15.36	1287.6758	11	14.2	644.8499	34.71
GPAGPIGPKGDNGSA	20.3	1293.6312	15	11.7	647.826	29.53
PGAVPGGDRFPGPA	18.99	1293.6465	14	5.2	647.8295	29.97
TWEGSLGPLPGPS	15.87	1296.635	13	-1.5	649.3194	73.2
PRGLPGPPGAPGPQ	26.31	1296.6938	14	-9.1	649.3439	57.3	sp|P02453|CO1A1_BOVIN
GLPGEAGMKGDLGP	15.57	1297.6335	14	7.2	649.8243	35.19	F1MTP1|F1MTP1_BOVIN:A0A3Q1M646|A0A3Q1M646_BOVIN:A0A3Q1MT85|A0A3Q1MT85_BOVIN
QATVPFLLQLAV	17.38	1298.7598	12	1.4	650.3836	69.91
TQGESRDRAGPK	21.33	1300.6483	12	5	651.3303	15.71
QQPQQPGAPPQQ	21.78	1302.6316	12	-4.5	652.3157	79.36
FSDFGPLAPQPE	28.25	1303.6084	12	2	652.8083	87.86
EGVGLREHFDF	16.42	1304.6149	11	4.9	653.3135	43.41
GPAPFALPSLQLP	19.22	1306.7285	13	4.3	654.3699	61.75
FGFDGDFYRAD	33.37	1308.541	11	1.2	655.2741	64.32	sp|P02465|CO1A2_BOVIN
GPGYPVVGGRAPSP	15.07	1309.6779	14	0.6	655.8421	41.01
GPPGPEGPPGAPGPE	15.65	1311.6095	15	-5.3	656.8041	22.36	F1MMG6|F1MMG6_BOVIN
RESAEQLSGPGPS	15.37	1313.6211	13	3.6	657.8157	49.1
PGTTSGSLSSVPGAP	18.47	1313.6462	15	-12.1	657.8179	26.34
GYEFGFDGDFY	52.15	1315.5033	11	2	658.7557	85.75	sp|P02465|CO1A2_BOVIN
GPSGPQGPSGPPGPK	38.53	1315.652	15	1.3	658.8296	12.55	sp|P02453|CO1A1_BOVIN
LPGIDGRPGPIGPA	44.6	1315.7247	14	-0.7	658.8647	54.23	sp|P02465|CO1A2_BOVIN
DEKSTGISVPGPM	38.72	1316.6282	13	0.1	659.317	49.4	sp|P02453|CO1A1_BOVIN
GPSGPPGAKGLPGEP	17.63	1316.6724	15	1.9	659.3402	18.94	F1MTP1|F1MTP1_BOVIN:A0A3Q1M646|A0A3Q1M646_BOVIN:A0A3Q1MT85|A0A3Q1MT85_BOVIN
GERGVPGPPGAVGPA	40.04	1316.6836	15	2.4	659.3461	26.84	sp|P02453|CO1A1_BOVIN
AALPSGPAGELHAK	15.76	1317.7041	14	-10.9	440.2342	14.02
GPAGPPGFQGLPGPA	16.71	1318.6669	15	-3.7	660.3337	26.4	sp|P02465|CO1A2_BOVIN
PGLSGAALASPPGPGA	22.34	1318.688	16	0.8	660.3473	50.18
PGSPGFPGVPGSPGI	16.88	1321.6666	15	0.7	661.8365	78.22	F1N7Q7|F1N7Q7_BOVIN:A0A3Q1LZF7|A0A3Q1LZF7_BOVIN:A0A3Q1MPS8|A0A3Q1MPS8_BOVIN:A0A3Q1LT89|A0A3Q1LT89_BOVIN:A0A3Q1LLV2|A0A3Q1LLV2_BOVIN:A0A3Q1NK70|A0A3Q1NK70_BOVIN
GPALSPLSGPSVGPS	15.93	1321.6877	15	-5.6	661.843	32.24
EFGFDGDFYRA	39.46	1322.5566	11	1.8	662.2823	76.62	sp|P02465|CO1A2_BOVIN
RPEVGQGQTPTGP	16.88	1322.6578	13	-2.3	662.3301	28.94
RGERGFPGLPGPS	33.85	1325.684	13	0	663.8447	32.26	sp|P02453|CO1A1_BOVIN
GSPGPQGPPGSIGPQ	33.28	1331.647	15	-2.2	666.8248	10.7	W0SK50|W0SK50_BOVIN
GPAGIRGSQGSQGPA	17.76	1338.6639	15	7.7	670.3398	26.42	sp|P02465|CO1A2_BOVIN
MPDIDLNLKGPK	16.91	1339.7169	12	0.7	447.5768	47.08	A0A3Q1MHT0|A0A3Q1MHT0_BOVIN:F1MCK2|F1MCK2_BOVIN:A0A3Q1NE82|A0A3Q1NE82_BOVIN
GPPGALGDPGLPGLQ	17.59	1344.7037	15	7.4	673.3595	31.49	A0A3Q1M1R0|A0A3Q1M1R0_BOVIN:A0A3Q1M906|A0A3Q1M906_BOVIN:F1MJY9|F1MJY9_BOVIN:A0A3Q1NK51|A0A3Q1NK51_BOVIN
VGVPGVGVPGVGVPGV	32.46	1344.7765	16	2.2	673.3924	84.62	sp|P04985|ELN_BOVIN
PGEPGPPGPPGPPGH	17.32	1345.6415	15	-10.4	673.8164	68.94	F1N2Y2|F1N2Y2_BOVIN:A0A3Q1LSX2|A0A3Q1LSX2_BOVIN:A0A3Q1LL95|A0A3Q1LL95_BOVIN:A0A3Q1MDT9|A0A3Q1MDT9_BOVIN:A0A3Q1MUF0|A0A3Q1MUF0_BOVIN
GPPGAKGPPGDDGPK	17.89	1345.6626	15	11.6	673.8418	15.48	F1N0K0|F1N0K0_BOVIN
GPIGSRGPSGPPGPD	23.7	1346.6578	15	-0.1	674.3315	18.69	sp|P02465|CO1A2_BOVIN
LEGPPGKTGPIGPQ	45.19	1346.7194	14	-0.7	674.3619	26.77	G3MZI7|G3MZI7_BOVIN
SGPAGPRGPPGSAGSP	16.55	1347.6531	16	1.7	674.8304	11.84	sp|P02453|CO1A1_BOVIN
HSPDTPKVWVPS	15.61	1348.6775	12	5.5	675.3451	21.74
FSLPQPSLHDLT	15.16	1353.6929	12	11.3	677.8568	43.2
SVGPLVLESEAVGT	15.37	1356.7136	14	-10	453.2375	41.1
GPPGEMGPKGPPGAL	15.57	1360.6809	15	-5.9	681.3391	67.89	F1MTP1|F1MTP1_BOVIN:A0A3Q1M646|A0A3Q1M646_BOVIN:A0A3Q1MT85|A0A3Q1MT85_BOVIN
PAATSVPSSGAPGAPP	22.27	1362.6779	16	10	682.3484	19.92
LGGVSFGPLPSPGSP	20	1367.7085	15	-10	684.85	36.36
GGYEFGFDGDFY	45.13	1372.5248	12	2.6	687.2668	83.41	sp|P02465|CO1A2_BOVIN
GLPGIDGRPGPIGPA	48.02	1372.7462	15	0.6	687.3761	58.42	sp|P02465|CO1A2_BOVIN
AAETGIPFSSLGPQ	21.58	1373.6826	14	-14.1	687.8342	71.81
GPPGPKGDRGGPGMP	20.43	1375.6666	15	14.5	688.8458	66.61	E1BPV7|E1BPV7_BOVIN:A0A3Q1LYA4|A0A3Q1LYA4_BOVIN
GPAGPPGFQGLPGPAG	38.25	1375.6884	16	-1.3	688.8459	27.2	sp|P02465|CO1A2_BOVIN
GLPGSDGAPGPPGTSL	24.33	1378.6729	16	8.2	690.3447	29.37	sp|Q32S24|COBA2_BOVIN
PPNLTGIPGGKPAY	15.1	1380.7401	14	9.5	691.3792	68.84
GPLGPRGEKGPVGAP	15.08	1387.7571	15	10.5	463.5947	16.43
GPAGPRGHPGPSGPPG	18.05	1393.6851	16	8.8	697.8512	26.28
DLSFLPQPPQEK	38.98	1397.719	12	1.4	699.863	64.99	sp|P02453|CO1A1_BOVIN
PGAGPDPPSPPGADPA	21.38	1398.6415	16	9.2	700.3297	60.32
GPAGPDGLKGDRGDP	16.91	1407.6742	15	1	704.8403	19.11	F1MTP1|F1MTP1_BOVIN:A0A3Q1M646|A0A3Q1M646_BOVIN:A0A3Q1MT85|A0A3Q1MT85_BOVIN
LPPPLPPGPPSVFP	35.8	1410.791	14	3.4	706.4004	88.29	A6QQQ3|A6QQQ3_BOVIN:sp|Q9GKN8|PRELP_BOVIN
GPAGERGPIGPVGPPG	22.02	1413.7363	16	8	472.2533	54.79
GQDGRPGPPGPPGAR	30.24	1414.7065	15	0.5	708.3561	11.91	sp|P02453|CO1A1_BOVIN
AHSPDTPKVWVPS	17.89	1419.7146	13	2.1	710.8612	22.11
GQQGTPGTQGLPGPQ	15.06	1421.6899	15	-1.5	711.8463	14.9	sp|Q32S24|COBA2_BOVIN
GPPGAPGAPGAPGPVGPA	50.97	1422.7255	18	2.1	712.3666	40.27	sp|P02453|CO1A1_BOVIN
LDGRRGEDGLPGSP	17.24	1424.7007	14	0.6	713.3531	46.02
GAPGPQGPSGAPGPQGP	16.08	1427.6793	17	1.4	714.8431	59.2
GAPGKDGYDGLPGPK	20.31	1427.7045	15	0.7	714.8552	25.87
GGGYEFGFDGDFY	54.88	1429.5461	13	2	715.7769	83.51	sp|P02465|CO1A2_BOVIN
GPQGPPGEIGFPGQP	20.43	1433.6938	15	-3.7	717.8467	53.23	sp|Q7SIB2|CO4A1_BOVIN
RGFPGNPGAPGSPGPA	46.75	1434.7003	16	-1.3	718.3516	25.06	Q08E14|Q08E14_BOVIN
PLYNAVAAPVSPGPS	17.78	1438.7456	15	5	720.3787	81.51
GFPGLTGLQGPQGDP	15.19	1439.7045	15	3.8	720.8573	40.72	F1N7Q7|F1N7Q7_BOVIN:A0A3Q1LZF7|A0A3Q1LZF7_BOVIN:A0A3Q1MPS8|A0A3Q1MPS8_BOVIN:A0A3Q1LT89|A0A3Q1LT89_BOVIN:A0A3Q1LLV2|A0A3Q1LLV2_BOVIN:A0A3Q1NK70|A0A3Q1NK70_BOVIN
QGPPGPPGSPGEQGPS	45.64	1444.6582	16	-4.8	723.328	24.48	sp|P02453|CO1A1_BOVIN
GPAGPGPYGYIRAGL	15.4	1444.7462	15	-4.9	723.3719	39.9
GPAGPPGPPGPMGPPGL	22.92	1451.723	17	-1.7	726.8626	48.08
PGSPGFPGVPGSPGIM	29.91	1452.707	16	0.8	727.3564	82.13	F1N7Q7|F1N7Q7_BOVIN:A0A3Q1LZF7|A0A3Q1LZF7_BOVIN:A0A3Q1MPS8|A0A3Q1MPS8_BOVIN:A0A3Q1LT89|A0A3Q1LT89_BOVIN:A0A3Q1LLV2|A0A3Q1LLV2_BOVIN:A0A3Q1NK70|A0A3Q1NK70_BOVIN
ASPGPPGPRRGAGAGGP	16.74	1457.7487	17	7.8	729.8823	40.98
GPSGPPGAPGSPGSSRP	33.77	1460.7007	17	-1	731.3519	36.88	F1MZU6|F1MZU6_BOVIN
GPPGPPGPPGPHGPPGP	26.34	1467.7258	17	-10.3	734.8576	76.75	E1BKJ9|E1BKJ9_BOVIN
GYEFGFDGDFYR	44.82	1471.6044	12	4.2	736.8075	77.92	sp|P02465|CO1A2_BOVIN
RGPSGPQGPSGPPGPK	40.9	1471.7531	16	0.2	736.8789	10.16	sp|P02453|CO1A1_BOVIN
GPAGPPGFQGLPGPAGT	37.59	1476.7361	17	9.6	739.3774	39.84	sp|P02465|CO1A2_BOVIN
SGPPGERGSPGIPGAPG	19.47	1488.7321	17	-1.2	745.3673	9.96	F1N474|F1N474_BOVIN:A0A3Q1M0M2|A0A3Q1M0M2_BOVIN:A0A3Q1M970|A0A3Q1M970_BOVIN
GPPGEPGPPGPPGPPGH	25.07	1499.7157	17	-7.6	750.8543	69.3	F1N2Y2|F1N2Y2_BOVIN:A0A3Q1LSX2|A0A3Q1LSX2_BOVIN:A0A3Q1LL95|A0A3Q1LL95_BOVIN:A0A3Q1MDT9|A0A3Q1MDT9_BOVIN:A0A3Q1MUF0|A0A3Q1MUF0_BOVIN
PGPPGPPGPPGTPVYD	20.57	1500.7249	16	9.1	751.3714	76.75
QPEGTIAPLGPKHGT	28.55	1501.7888	15	-0.1	501.6001	48.77	F1MKR5|F1MKR5_BOVIN
PDSSTITQGVPAPGPS	15.34	1509.7311	16	-4.1	755.8646	82.44
RGEPGPPGPAGFAGPPG	18.41	1516.7422	17	-4.3	759.3699	72.76	sp|P02453|CO1A1_BOVIN
SPGPQGQPGLPGPPGPS	17.17	1525.7524	17	-5.6	763.874	53.82
LPPPLPPGPPSVFPD	31.7	1525.818	15	3.9	763.9141	87.71	A6QQQ3|A6QQQ3_BOVIN:sp|Q9GKN8|PRELP_BOVIN
GYEFGFDGDFYRA	43.83	1542.6415	13	1	772.3235	79.33	sp|P02465|CO1A2_BOVIN
GPAGPPGASGLPGHNGSD	16.37	1543.7014	18	5.2	772.8567	34.42
GAPGPKGSKGDLGPVGAP	19.26	1560.8259	18	9	521.2837	33.39
GPPGPPGPPGPHGPPGPP	20	1564.7786	18	-7.5	522.5927	65.48	E1BKJ9|E1BKJ9_BOVIN
RDAGYGGLSLSIEGPS	20.28	1577.7686	16	-5.5	789.8818	29.76
RGFPGLPGPSGEPGKQ	42.71	1579.8107	16	0.6	527.6075	30.26	sp|P02453|CO1A1_BOVIN
GGGYEFGFDGDFYR	53.64	1585.6473	14	-0.2	793.8254	77.75	sp|P02465|CO1A2_BOVIN
DLSFLPQPPQEKAH	29.23	1605.8151	14	0.5	536.2756	51.9	sp|P02453|CO1A1_BOVIN
PGLAGKEGTKGDPGPAGL	15.45	1620.847	18	14.1	811.4367	75.84	G3MZI7|G3MZI7_BOVIN
GPPGPPGPPGPHGPPGPPG	35.39	1621.8	19	-10.9	811.8929	63.04	E1BKJ9|E1BKJ9_BOVIN
VAGLDNAVSLFQVDGK	16.08	1631.8518	16	8.9	544.959	28.07
CLTGPPGASGLPGHNGSD	16.34	1635.7311	18	-9.8	818.8592	19.68
GPPGPPGPPGPPGPPSGGY	19.36	1637.7837	19	-0.4	819.8932	72.47	sp|P02453|CO1A1_BOVIN
GPPGPPGPPGPPGAPGAFD	28.69	1637.7837	19	0.9	819.8942	72.11	F1MJR6|F1MJR6_BOVIN:Q7M2X0|Q7M2X0_BOVIN
LEKGGCTGPPGPPGHPGP	17.22	1653.7932	18	-10.2	827.8898	63.45
GGGYEFGFDGDFYRA	50.64	1656.6844	15	2	829.3455	77.86	sp|P02465|CO1A2_BOVIN
PDGLRGIPGPVGEQGLP	17.19	1657.8787	17	1	553.6302	51.02	G3MZI7|G3MZI7_BOVIN
DRPGLGPLVAAACSDGAV	18.85	1667.8301	18	-3.6	834.9136	73.94
KGDLGPVGAPGEHGLAGAP	21.38	1698.8689	19	9.2	567.2982	38.13
PDGLRGIPGPVGEQGLPG	17.02	1714.9001	18	0.4	572.637	46.56	G3MZI7|G3MZI7_BOVIN
PGPAGLKGERGAPGELGAP	16.26	1729.911	19	1.8	577.6414	63.56
GERGFPGLPGPSGEPGKQ	34.68	1765.8746	18	-2.5	589.6266	33.7	sp|P02453|CO1A1_BOVIN
DLSFLPQPPQEKAHDG	20.31	1777.8634	16	1.4	593.6252	56.74	sp|P02453|CO1A1_BOVIN
GLPGQRGERGFPGLPGPS	22.37	1777.9222	18	2	593.6451	40.26	sp|P02453|CO1A1_BOVIN
GPPGAPGRSGPAGPEGLPGSP	21.09	1810.8961	21	0.1	604.6353	37.98	F1MZU6|F1MZU6_BOVIN
DRGLKGENGVGQPGLPGAP	15.82	1817.9384	19	-1.3	606.9818	41.58	F1MJR6|F1MJR6_BOVIN
GPPGPPGPPGPPGPPSGGYDLS	17.79	1952.9268	22	-6.8	651.974	77.02	sp|P02453|CO1A1_BOVIN
GAPGEKGEGGRPGLPGPRGEP	19	1970.9922	21	0.7	658.0006	39.47
GAPALPAFPGLQPPATGAATAP	16.5	1972.0417	22	-12.6	658.3417	64.74
PGAVGEKGEPGEAGEPGLPGEG	16.72	1989.9279	22	-2.8	664.3102	72.61	G3MZI7|G3MZI7_BOVIN
DLSFLPQPPQEKAHDGGR	33.69	1990.986	18	0	664.6647	46.98	sp|P02453|CO1A1_BOVIN
PPGESGAAGPTGPIGSRGPSGPP	18.65	1998.9758	23	-0.6	667.3276	29.05	sp|P02465|CO1A2_BOVIN
GPAGPDGHQGPRGEQGLPGMP	16.19	2010.933	21	0.4	671.314	80.34	W0SK50|W0SK50_BOVIN
RDGLPGLPGLPGPPGAASETGT	22.1	2016.0276	22	1.9	673.0132	72.51	A0A3Q1M1R0|A0A3Q1M1R0_BOVIN:A0A3Q1M906|A0A3Q1M906_BOVIN:F1MJY9|F1MJY9_BOVIN:A0A3Q1NK51|A0A3Q1NK51_BOVIN
GPPGPPGPPGPPGEKGQMGLSF	22.02	2057.0039	22	-2.5	686.6688	73.56	sp|Q7SIB2|CO4A1_BOVIN
GYPGPAGPPGPPGPPGTSGHPGAP	23.63	2074.9861	24	-5.3	692.6609	69.1	Q08E14|Q08E14_BOVIN
PGAPGPPGSPGPAGPIGKQGDRGE	17.61	2152.0659	24	9.3	718.3643	38.29
RDGLPGLPGLPGPPGAASETGTLQ	15.56	2257.1702	24	2.5	753.394	65.45	A0A3Q1M1R0|A0A3Q1M1R0_BOVIN:A0A3Q1M906|A0A3Q1M906_BOVIN:F1MJY9|F1MJY9_BOVIN:A0A3Q1NK51|A0A3Q1NK51_BOVIN
DLSFLPQPPQEKAHDGGRYY	32.2	2317.1125	20	-0.3	773.3726	58.2	sp|P02453|CO1A1_BOVIN
